# Supplementary material for: Boosting targeted genome editing using the hei-tag
Source: eLife. 2022 Mar 25;11:e70558. doi: 10.7554/eLife.70558 (PMC9068219; doi:10.7554/eLife.70558)
Supplement: Figure 2—figure supplement 1—source data 1. [file elife-70558-fig2-figsupp1-data1.xlsx]

## Sheet: all
Sample	Amplicon	Unmodified%	Modified%	Reads_in_input	Reads_aligned_all_amplicons	Reads_aligned	Unmodified	Modified	Discarded	Insertions	Deletions	Substitutions	Only Insertions	Only Deletions	Only Substitutions	Insertions and Deletions	Insertions and Substitutions	Deletions and Substitutions	Insertions Deletions and Substitutions	INDELs	%INDELs	Only Substitutions	%only_Subs
heiCas9	OlOca2	38.1478	61.8522	272082	56572	56572	21581	34991	0	3819	29363	3148	3199	28644	1809	0	620	719	0	33182	58.6545	1809	3.19769
heiCas9	OlOca2	62.4819	37.5181	283089	59294	59294	37048	22246	0	2512	19189	1063	2102	19081	545	0	410	108	0	21701	36.599	545	0.919149
heiCas9	OlOca2	35.6113	64.3887	299074	64356	64356	22918	41438	0	8169	31987	2799	6812	31827	1282	0	1357	160	0	40156	62.3967	1282	1.99204
zCas9	OlOca2	95.3862	4.61384	302557	66669	66669	63593	3076	0	449	2536	214	337	2525	91	0	112	11	0	2985	4.47734	91	0.136495
zCas9	OlOca2	97.1872	2.81284	293741	70036	70036	68066	1970	0	190	1705	118	147	1705	75	0	43	0	0	1895	2.70575	75	0.107088
zCas9	OlOca2	97.2744	2.72559	271387	58226	58226	56639	1587	0	136	1394	97	99	1391	57	0	37	3	0	1530	2.62769	57	0.0978944
control	OlOca2	99.9307	0.0692958	234585	49065	49065	49031	34	0	0	3	31	0	3	31	0	0	0	0	3	0.00611434	31	0.0631815
control	OlOca2	99.9459	0.0541464	231107	48018	48018	47992	26	0	0	1	25	0	1	25	0	0	0	0	1	0.00208255	25	0.0520638
control	OlOca2	99.9168	0.0832448	267492	56460	56460	56413	47	0	1	13	33	1	13	33	0	0	0	0	14	0.0247963	33	0.0584485
heiCas9	OlRx2	4.8218	95.1782	272082	83952	83952	4048	79904	0	13865	63470	10899	6979	62026	2569	0	6886	1444	0	77335	92.1181	2569	3.06008
heiCas9	OlRx2	4.65938	95.3406	283089	88252	88252	4112	84140	0	13904	66245	14792	6747	62601	3991	0	7157	3644	0	80149	90.8183	3991	4.52228
heiCas9	OlRx2	2.9732	97.0268	299074	96899	96899	2881	94018	0	15467	74179	18972	3397	71649	4372	0	12070	2530	0	89646	92.5149	4372	4.51191
zCas9	OlRx2	77.2277	22.7723	302557	76347	76347	58961	17386	0	3221	13432	2778	1664	12944	733	0	1557	488	0	16653	21.8123	733	0.96009
zCas9	OlRx2	79.9618	20.0382	293741	65006	65006	51980	13026	0	3270	9204	1977	2308	8741	552	0	962	463	0	12474	19.189	552	0.849152
zCas9	OlRx2	80.3546	19.6454	271387	82793	82793	66528	16265	0	3350	12140	3038	1645	11582	775	0	1705	558	0	15490	18.7093	775	0.936069
control	OlRx2	99.92	0.0800054	234585	73745	73745	73686	59	0	7	13	41	5	13	39	0	2	0	0	20	0.0271205	39	0.0528849
control	OlRx2	99.9428	0.0571841	231107	73447	73447	73405	42	0	3	9	32	2	8	30	0	1	1	0	12	0.0163383	30	0.0408458
control	OlRx2	99.875	0.124994	267492	83204	83204	83100	104	0	12	48	52	6	46	44	0	6	2	0	60	0.0721119	44	0.0528821
heiCas9	OlRx3	53.1471	46.8529	272082	57847	57847	30744	27103	0	2664	24080	1994	2382	22727	359	0	282	1353	0	26744	46.2323	359	0.620603
heiCas9	OlRx3	53.44	46.56	283089	59085	59085	31575	27510	0	1510	25087	2925	470	24115	913	0	1040	972	0	26597	45.0148	913	1.54523
heiCas9	OlRx3	45.3452	54.6548	299074	58112	58112	26351	31761	0	796	30017	1975	520	29266	948	0	276	751	0	30813	53.0235	948	1.63133
zCas9	OlRx3	82.9861	17.0139	302557	66422	66422	55121	11301	0	916	10050	1338	478	9485	335	0	438	565	0	10966	16.5096	335	0.504351
zCas9	OlRx3	84.7883	15.2117	293741	71077	71077	60265	10812	0	919	9548	1260	521	9031	345	0	398	517	0	10467	14.7263	345	0.485389
zCas9	OlRx3	82.3876	17.6124	271387	57749	57749	47578	10171	0	721	9122	761	488	8922	328	0	233	200	0	9843	17.0445	328	0.567975
control	OlRx3	99.8683	0.131695	234585	48597	48597	48533	64	0	2	12	51	1	12	50	0	1	0	0	14	0.0288084	50	0.102887
control	OlRx3	99.8923	0.107665	231107	52013	52013	51957	56	0	0	11	46	0	10	45	0	0	1	0	11	0.0211486	45	0.0865168
control	OlRx3	99.862	0.13797	267492	59433	59433	59351	82	0	5	29	49	5	28	48	0	0	1	0	34	0.0572073	48	0.0807632
heiCas9	OlCryaa	0.177581	99.8224	272082	63633	63633	113	63520	0	10998	48487	8006	9413	46101	4035	0	1585	2386	0	59485	93.4814	4035	6.34105
heiCas9	OlCryaa	2.95701	97.043	283089	67602	67602	1999	65603	0	5424	60168	1384	4056	60163	11	0	1368	5	0	65592	97.0267	11	0.0162717
heiCas9	OlCryaa	1.54595	98.454	299074	69213	69213	1070	68143	0	6242	57486	5961	4703	57479	4415	0	1539	7	0	63728	92.0752	4415	6.37886
zCas9	OlCryaa	9.92824	90.0718	302557	71624	71624	7111	64513	0	9451	53639	3917	7170	53426	1423	0	2281	213	0	63090	88.085	1423	1.98676
zCas9	OlCryaa	19.1668	80.8332	293741	76669	76669	14695	61974	0	9393	50568	4301	7620	50053	2013	0	1773	515	0	59961	78.2076	2013	2.62557
zCas9	OlCryaa	20.4047	79.5953	271387	61280	61280	12504	48776	0	8434	39673	3333	6114	39329	669	0	2320	344	0	48107	78.5036	669	1.09171
control	OlCryaa	99.8222	0.177794	234585	56245	56245	56145	100	0	11	53	37	10	53	36	0	1	0	0	64	0.113788	36	0.0640057
control	OlCryaa	99.8369	0.163052	231107	50904	50904	50821	83	0	6	40	38	6	39	37	0	0	1	0	46	0.0903662	37	0.0726858
control	OlCryaa	99.7888	0.211193	267492	60608	60608	60480	128	0	14	76	40	13	75	38	0	1	1	0	90	0.148495	38	0.062698
