# Supplementary material for: Boosting targeted genome editing using the hei-tag
Source: eLife. 2022 Mar 25;11:e70558. doi: 10.7554/eLife.70558 (PMC9068219; doi:10.7554/eLife.70558)
Supplement: Figure 3—source data 1. [file elife-70558-fig3-data1.xlsx]

## Sheet: Tabelle1
Cas9 variant	TIDE indel %	R Squared	ICE indel %	KO-Score	R Squared	replicates
JDS246-Cas9	45.3	0.95	53	34	0.95	1
JDS246-Cas9	46.6	0.95	57	36	0.95	2
JDS246-Cas9	46.6	0.95	50	31	0.95	3
GeneArt® CRISPR nuclease	46.7	0.94	57	37	0.94	1
GeneArt® CRISPR nuclease	46.4	0.94	53	34	0.94	2
GeneArt® CRISPR nuclease	46.1	0.94	53	34	0.94	3
heiCas9	58.4	0.95	58	56	0.95	1
heiCas9	58.4	0.95	63	61	0.95	2
heiCas9	54.6	0.94	60	58	0.94	3
