# Supplementary material for: Boosting targeted genome editing using the hei-tag
Source: eLife. 2022 Mar 25;11:e70558. doi: 10.7554/eLife.70558 (PMC9068219; doi:10.7554/eLife.70558)
Supplement: Figure 4—source data 1. [file elife-70558-fig4-data1.csv]

Mean	embryo	injected	species
0,302	1	BE4-Gam OlOca2_T4	medaka
0,265	1	BE4-Gam OlOca2_T4	medaka
0	2	BE4-Gam OlOca2_T4	medaka
0,278	2	BE4-Gam OlOca2_T4	medaka
0	3	BE4-Gam OlOca2_T4	medaka
6,962	3	BE4-Gam OlOca2_T4	medaka
1,276	4	BE4-Gam OlOca2_T4	medaka
2,254	4	BE4-Gam OlOca2_T4	medaka
0	5	BE4-Gam OlOca2_T4	medaka
0	5	BE4-Gam OlOca2_T4	medaka
0	6	BE4-Gam OlOca2_T4	medaka
0	6	BE4-Gam OlOca2_T4	medaka
3,105	7	BE4-Gam OlOca2_T4	medaka
0	7	BE4-Gam OlOca2_T4	medaka
0,638	8	BE4-Gam OlOca2_T4	medaka
0	8	BE4-Gam OlOca2_T4	medaka
1,487	9	BE4-Gam OlOca2_T4	medaka
4,153	9	BE4-Gam OlOca2_T4	medaka
5,98	10	BE4-Gam OlOca2_T4	medaka
13,291	10	BE4-Gam OlOca2_T4	medaka
21,052	11	BE4-Gam OlOca2_T4	medaka
8,41	11	BE4-Gam OlOca2_T4	medaka
0	12	BE4-Gam OlOca2_T4	medaka
0	12	BE4-Gam OlOca2_T4	medaka
0,583	13	BE4-Gam OlOca2_T4	medaka
16,267	13	BE4-Gam OlOca2_T4	medaka
1,769	14	BE4-Gam OlOca2_T4	medaka
2,606	14	BE4-Gam OlOca2_T4	medaka
1,396	15	BE4-Gam OlOca2_T4	medaka
0	15	BE4-Gam OlOca2_T4	medaka
4,611	16	BE4-Gam OlOca2_T4	medaka
0	16	BE4-Gam OlOca2_T4	medaka
0	17	BE4-Gam OlOca2_T4	medaka
5,51	17	BE4-Gam OlOca2_T4	medaka
2,022	18	BE4-Gam OlOca2_T4	medaka
1,241	18	BE4-Gam OlOca2_T4	medaka
0	19	BE4-Gam OlOca2_T4	medaka
0	19	BE4-Gam OlOca2_T4	medaka
0,12	20	BE4-Gam OlOca2_T4	medaka
0	20	BE4-Gam OlOca2_T4	medaka
0,918	21	BE4-Gam OlOca2_T4	medaka
0	21	BE4-Gam OlOca2_T4	medaka
15,278	22	BE4-Gam OlOca2_T4	medaka
9,274	22	BE4-Gam OlOca2_T4	medaka
3,043	23	BE4-Gam OlOca2_T4	medaka
0	23	BE4-Gam OlOca2_T4	medaka
5,068	24	BE4-Gam OlOca2_T4	medaka
8,092	24	BE4-Gam OlOca2_T4	medaka
6,839	25	BE4-Gam OlOca2_T4	medaka
3,502	25	BE4-Gam OlOca2_T4	medaka
0	26	BE4-Gam OlOca2_T4	medaka
0	26	BE4-Gam OlOca2_T4	medaka
8,889	27	BE4-Gam OlOca2_T4	medaka
11,167	27	BE4-Gam OlOca2_T4	medaka
0	28	BE4-Gam OlOca2_T4	medaka
0	28	BE4-Gam OlOca2_T4	medaka
2,254	29	BE4-Gam OlOca2_T4	medaka
0	29	BE4-Gam OlOca2_T4	medaka
1,069	30	BE4-Gam OlOca2_T4	medaka
0,469	30	BE4-Gam OlOca2_T4	medaka
3,087	31	BE4-Gam OlOca2_T4	medaka
10,774	31	BE4-Gam OlOca2_T4	medaka
0,608	32	BE4-Gam OlOca2_T4	medaka
0,681	32	BE4-Gam OlOca2_T4	medaka
0	33	BE4-Gam OlOca2_T4	medaka
0	33	BE4-Gam OlOca2_T4	medaka
78,208	34	BE4-Gam OlOca2_T4	medaka
31,306	34	BE4-Gam OlOca2_T4	medaka
20,567	35	BE4-Gam OlOca2_T4	medaka
4,279	35	BE4-Gam OlOca2_T4	medaka
8,839	36	BE4-Gam OlOca2_T4	medaka
6,951	36	BE4-Gam OlOca2_T4	medaka
0	37	BE4-Gam OlOca2_T4	medaka
0	37	BE4-Gam OlOca2_T4	medaka
0	38	BE4-Gam OlOca2_T4	medaka
0,349	38	BE4-Gam OlOca2_T4	medaka
0	39	BE4-Gam OlOca2_T4	medaka
0	39	BE4-Gam OlOca2_T4	medaka
0	40	BE4-Gam OlOca2_T4	medaka
0	40	BE4-Gam OlOca2_T4	medaka
39,817	1	heiBE4-Gam OlOca2_T4	medaka
7,395	1	heiBE4-Gam OlOca2_T4	medaka
0	2	heiBE4-Gam OlOca2_T4	medaka
2,717	2	heiBE4-Gam OlOca2_T4	medaka
53,743	3	heiBE4-Gam OlOca2_T4	medaka
78,938	3	heiBE4-Gam OlOca2_T4	medaka
42,899	4	heiBE4-Gam OlOca2_T4	medaka
46,508	4	heiBE4-Gam OlOca2_T4	medaka
26,97	5	heiBE4-Gam OlOca2_T4	medaka
255	5	heiBE4-Gam OlOca2_T4	medaka
33,561	6	heiBE4-Gam OlOca2_T4	medaka
53,767	6	heiBE4-Gam OlOca2_T4	medaka
36,988	7	heiBE4-Gam OlOca2_T4	medaka
20,751	7	heiBE4-Gam OlOca2_T4	medaka
13,186	8	heiBE4-Gam OlOca2_T4	medaka
8,498	8	heiBE4-Gam OlOca2_T4	medaka
125,283	9	heiBE4-Gam OlOca2_T4	medaka
88,441	9	heiBE4-Gam OlOca2_T4	medaka
12,004	10	heiBE4-Gam OlOca2_T4	medaka
28,347	10	heiBE4-Gam OlOca2_T4	medaka
15,112	11	heiBE4-Gam OlOca2_T4	medaka
6,083	11	heiBE4-Gam OlOca2_T4	medaka
35,434	12	heiBE4-Gam OlOca2_T4	medaka
20,534	12	heiBE4-Gam OlOca2_T4	medaka
49,432	13	heiBE4-Gam OlOca2_T4	medaka
52,354	13	heiBE4-Gam OlOca2_T4	medaka
19,632	14	heiBE4-Gam OlOca2_T4	medaka
66,781	14	heiBE4-Gam OlOca2_T4	medaka
15,78	15	heiBE4-Gam OlOca2_T4	medaka
38,097	15	heiBE4-Gam OlOca2_T4	medaka
0	16	heiBE4-Gam OlOca2_T4	medaka
3,06	16	heiBE4-Gam OlOca2_T4	medaka
110,234	17	heiBE4-Gam OlOca2_T4	medaka
106,377	17	heiBE4-Gam OlOca2_T4	medaka
30,595	18	heiBE4-Gam OlOca2_T4	medaka
31,327	18	heiBE4-Gam OlOca2_T4	medaka
5,032	19	heiBE4-Gam OlOca2_T4	medaka
6,965	19	heiBE4-Gam OlOca2_T4	medaka
27,214	20	heiBE4-Gam OlOca2_T4	medaka
20,244	20	heiBE4-Gam OlOca2_T4	medaka
45,018	21	heiBE4-Gam OlOca2_T4	medaka
16,777	21	heiBE4-Gam OlOca2_T4	medaka
27,787	22	heiBE4-Gam OlOca2_T4	medaka
48,687	22	heiBE4-Gam OlOca2_T4	medaka
96,245	23	heiBE4-Gam OlOca2_T4	medaka
55,459	23	heiBE4-Gam OlOca2_T4	medaka
16,521	24	heiBE4-Gam OlOca2_T4	medaka
13,617	24	heiBE4-Gam OlOca2_T4	medaka
15,218	25	heiBE4-Gam OlOca2_T4	medaka
4,24	25	heiBE4-Gam OlOca2_T4	medaka
20,231	26	heiBE4-Gam OlOca2_T4	medaka
13,753	26	heiBE4-Gam OlOca2_T4	medaka
9,459	27	heiBE4-Gam OlOca2_T4	medaka
25,256	27	heiBE4-Gam OlOca2_T4	medaka
97,811	28	heiBE4-Gam OlOca2_T4	medaka
115,631	28	heiBE4-Gam OlOca2_T4	medaka
10,81	29	heiBE4-Gam OlOca2_T4	medaka
38,015	29	heiBE4-Gam OlOca2_T4	medaka
15,582	30	heiBE4-Gam OlOca2_T4	medaka
23,677	30	heiBE4-Gam OlOca2_T4	medaka
21,789	31	heiBE4-Gam OlOca2_T4	medaka
17,644	31	heiBE4-Gam OlOca2_T4	medaka
79,409	32	heiBE4-Gam OlOca2_T4	medaka
72,873	32	heiBE4-Gam OlOca2_T4	medaka
36,667	33	heiBE4-Gam OlOca2_T4	medaka
43,982	33	heiBE4-Gam OlOca2_T4	medaka
75,104	34	heiBE4-Gam OlOca2_T4	medaka
74,48	34	heiBE4-Gam OlOca2_T4	medaka
0	35	heiBE4-Gam OlOca2_T4	medaka
0	35	heiBE4-Gam OlOca2_T4	medaka
45,973	36	heiBE4-Gam OlOca2_T4	medaka
28,209	36	heiBE4-Gam OlOca2_T4	medaka
12,236	37	heiBE4-Gam OlOca2_T4	medaka
31,07	37	heiBE4-Gam OlOca2_T4	medaka
68,445	38	heiBE4-Gam OlOca2_T4	medaka
49,066	38	heiBE4-Gam OlOca2_T4	medaka
30,96	39	heiBE4-Gam OlOca2_T4	medaka
10,908	39	heiBE4-Gam OlOca2_T4	medaka
84,25	40	heiBE4-Gam OlOca2_T4	medaka
105,276	40	heiBE4-Gam OlOca2_T4	medaka
27,677	41	heiBE4-Gam OlOca2_T4	medaka
23,803	41	heiBE4-Gam OlOca2_T4	medaka
26,661	42	heiBE4-Gam OlOca2_T4	medaka
82,38	42	heiBE4-Gam OlOca2_T4	medaka
40,188	43	heiBE4-Gam OlOca2_T4	medaka
22,648	43	heiBE4-Gam OlOca2_T4	medaka
21,545	44	heiBE4-Gam OlOca2_T4	medaka
19,777	44	heiBE4-Gam OlOca2_T4	medaka
129,743	45	heiBE4-Gam OlOca2_T4	medaka
114,77	45	heiBE4-Gam OlOca2_T4	medaka
10,101	46	heiBE4-Gam OlOca2_T4	medaka
33,811	46	heiBE4-Gam OlOca2_T4	medaka
0,23	47	heiBE4-Gam OlOca2_T4	medaka
0	47	heiBE4-Gam OlOca2_T4	medaka
13,705	1	BE4-Gam OlOca2_T1	medaka
3,567	1	BE4-Gam OlOca2_T1	medaka
0,218	2	BE4-Gam OlOca2_T1	medaka
0	2	BE4-Gam OlOca2_T1	medaka
7,593	3	BE4-Gam OlOca2_T1	medaka
0,257	3	BE4-Gam OlOca2_T1	medaka
0	4	BE4-Gam OlOca2_T1	medaka
0,299	4	BE4-Gam OlOca2_T1	medaka
0	5	BE4-Gam OlOca2_T1	medaka
0,053	5	BE4-Gam OlOca2_T1	medaka
7,855	6	BE4-Gam OlOca2_T1	medaka
4,819	6	BE4-Gam OlOca2_T1	medaka
11,12	7	BE4-Gam OlOca2_T1	medaka
0	7	BE4-Gam OlOca2_T1	medaka
0	8	BE4-Gam OlOca2_T1	medaka
7,81	8	BE4-Gam OlOca2_T1	medaka
0	9	BE4-Gam OlOca2_T1	medaka
0,91	9	BE4-Gam OlOca2_T1	medaka
0	10	BE4-Gam OlOca2_T1	medaka
0	10	BE4-Gam OlOca2_T1	medaka
0,054	11	BE4-Gam OlOca2_T1	medaka
0	11	BE4-Gam OlOca2_T1	medaka
8,057	12	BE4-Gam OlOca2_T1	medaka
8,496	12	BE4-Gam OlOca2_T1	medaka
0	13	BE4-Gam OlOca2_T1	medaka
0	13	BE4-Gam OlOca2_T1	medaka
2,159	14	BE4-Gam OlOca2_T1	medaka
0	14	BE4-Gam OlOca2_T1	medaka
0	15	BE4-Gam OlOca2_T1	medaka
0	15	BE4-Gam OlOca2_T1	medaka
0	16	BE4-Gam OlOca2_T1	medaka
0	16	BE4-Gam OlOca2_T1	medaka
0	17	BE4-Gam OlOca2_T1	medaka
0	17	BE4-Gam OlOca2_T1	medaka
0	18	BE4-Gam OlOca2_T1	medaka
0	18	BE4-Gam OlOca2_T1	medaka
0,895	19	BE4-Gam OlOca2_T1	medaka
0	19	BE4-Gam OlOca2_T1	medaka
0	20	BE4-Gam OlOca2_T1	medaka
0	20	BE4-Gam OlOca2_T1	medaka
0	21	BE4-Gam OlOca2_T1	medaka
2,74	21	BE4-Gam OlOca2_T1	medaka
1,614	22	BE4-Gam OlOca2_T1	medaka
0	22	BE4-Gam OlOca2_T1	medaka
0	23	BE4-Gam OlOca2_T1	medaka
0	23	BE4-Gam OlOca2_T1	medaka
0	24	BE4-Gam OlOca2_T1	medaka
1,015	24	BE4-Gam OlOca2_T1	medaka
5,897	25	BE4-Gam OlOca2_T1	medaka
1,324	25	BE4-Gam OlOca2_T1	medaka
0	26	BE4-Gam OlOca2_T1	medaka
5,94	26	BE4-Gam OlOca2_T1	medaka
23,864	27	BE4-Gam OlOca2_T1	medaka
0,079	27	BE4-Gam OlOca2_T1	medaka
0,243	28	BE4-Gam OlOca2_T1	medaka
2,983	28	BE4-Gam OlOca2_T1	medaka
0	29	BE4-Gam OlOca2_T1	medaka
0,256	29	BE4-Gam OlOca2_T1	medaka
0	30	BE4-Gam OlOca2_T1	medaka
7,05	30	BE4-Gam OlOca2_T1	medaka
2,528	31	BE4-Gam OlOca2_T1	medaka
1,609	31	BE4-Gam OlOca2_T1	medaka
5,735	32	BE4-Gam OlOca2_T1	medaka
0,402	32	BE4-Gam OlOca2_T1	medaka
0	33	BE4-Gam OlOca2_T1	medaka
0	33	BE4-Gam OlOca2_T1	medaka
1,623	34	BE4-Gam OlOca2_T1	medaka
0	34	BE4-Gam OlOca2_T1	medaka
15,32	1	heiBE4-Gam OlOca2_T1	medaka
5,587	1	heiBE4-Gam OlOca2_T1	medaka
0	2	heiBE4-Gam OlOca2_T1	medaka
0	2	heiBE4-Gam OlOca2_T1	medaka
0	3	heiBE4-Gam OlOca2_T1	medaka
11,802	3	heiBE4-Gam OlOca2_T1	medaka
0	4	heiBE4-Gam OlOca2_T1	medaka
0	4	heiBE4-Gam OlOca2_T1	medaka
0	5	heiBE4-Gam OlOca2_T1	medaka
5,113	5	heiBE4-Gam OlOca2_T1	medaka
3,228	6	heiBE4-Gam OlOca2_T1	medaka
0	6	heiBE4-Gam OlOca2_T1	medaka
8,719	7	heiBE4-Gam OlOca2_T1	medaka
0	7	heiBE4-Gam OlOca2_T1	medaka
25,31	8	heiBE4-Gam OlOca2_T1	medaka
6,28	8	heiBE4-Gam OlOca2_T1	medaka
0	9	heiBE4-Gam OlOca2_T1	medaka
0	9	heiBE4-Gam OlOca2_T1	medaka
0	10	heiBE4-Gam OlOca2_T1	medaka
1,518	10	heiBE4-Gam OlOca2_T1	medaka
29,541	11	heiBE4-Gam OlOca2_T1	medaka
6,609	11	heiBE4-Gam OlOca2_T1	medaka
0	12	heiBE4-Gam OlOca2_T1	medaka
0,693	12	heiBE4-Gam OlOca2_T1	medaka
0	13	heiBE4-Gam OlOca2_T1	medaka
0	13	heiBE4-Gam OlOca2_T1	medaka
0	14	heiBE4-Gam OlOca2_T1	medaka
0	14	heiBE4-Gam OlOca2_T1	medaka
0	15	heiBE4-Gam OlOca2_T1	medaka
1,088	15	heiBE4-Gam OlOca2_T1	medaka
0	16	heiBE4-Gam OlOca2_T1	medaka
0	16	heiBE4-Gam OlOca2_T1	medaka
0	17	heiBE4-Gam OlOca2_T1	medaka
0	17	heiBE4-Gam OlOca2_T1	medaka
0,12	18	heiBE4-Gam OlOca2_T1	medaka
0	18	heiBE4-Gam OlOca2_T1	medaka
0	19	heiBE4-Gam OlOca2_T1	medaka
1,979	19	heiBE4-Gam OlOca2_T1	medaka
0	20	heiBE4-Gam OlOca2_T1	medaka
4,062	20	heiBE4-Gam OlOca2_T1	medaka
4,663	21	heiBE4-Gam OlOca2_T1	medaka
3,115	21	heiBE4-Gam OlOca2_T1	medaka
0,283	22	heiBE4-Gam OlOca2_T1	medaka
1,513	22	heiBE4-Gam OlOca2_T1	medaka
0,926	23	heiBE4-Gam OlOca2_T1	medaka
7,594	23	heiBE4-Gam OlOca2_T1	medaka
0,432	24	heiBE4-Gam OlOca2_T1	medaka
0	24	heiBE4-Gam OlOca2_T1	medaka
12,906	25	heiBE4-Gam OlOca2_T1	medaka
11,392	25	heiBE4-Gam OlOca2_T1	medaka
35,65	26	heiBE4-Gam OlOca2_T1	medaka
18,871	26	heiBE4-Gam OlOca2_T1	medaka
0,132	27	heiBE4-Gam OlOca2_T1	medaka
0	27	heiBE4-Gam OlOca2_T1	medaka
4,775	28	heiBE4-Gam OlOca2_T1	medaka
7,324	28	heiBE4-Gam OlOca2_T1	medaka
0,461	29	heiBE4-Gam OlOca2_T1	medaka
0,053	29	heiBE4-Gam OlOca2_T1	medaka
0,262	30	heiBE4-Gam OlOca2_T1	medaka
8,295	30	heiBE4-Gam OlOca2_T1	medaka
0,059	31	heiBE4-Gam OlOca2_T1	medaka
3,631	31	heiBE4-Gam OlOca2_T1	medaka
0	32	heiBE4-Gam OlOca2_T1	medaka
21,482	32	heiBE4-Gam OlOca2_T1	medaka
1,393	33	heiBE4-Gam OlOca2_T1	medaka
10,595	33	heiBE4-Gam OlOca2_T1	medaka
1,573	34	heiBE4-Gam OlOca2_T1	medaka
7,717	34	heiBE4-Gam OlOca2_T1	medaka
0	35	heiBE4-Gam OlOca2_T1	medaka
1,906	35	heiBE4-Gam OlOca2_T1	medaka
0	36	heiBE4-Gam OlOca2_T1	medaka
0,181	36	heiBE4-Gam OlOca2_T1	medaka
13,772	37	heiBE4-Gam OlOca2_T1	medaka
0	37	heiBE4-Gam OlOca2_T1	medaka
14,822	38	heiBE4-Gam OlOca2_T1	medaka
5,29	38	heiBE4-Gam OlOca2_T1	medaka
2,163	39	heiBE4-Gam OlOca2_T1	medaka
0	39	heiBE4-Gam OlOca2_T1	medaka
1,203	40	heiBE4-Gam OlOca2_T1	medaka
1,367	40	heiBE4-Gam OlOca2_T1	medaka
0	41	heiBE4-Gam OlOca2_T1	medaka
13,053	41	heiBE4-Gam OlOca2_T1	medaka
0	42	heiBE4-Gam OlOca2_T1	medaka
0	42	heiBE4-Gam OlOca2_T1	medaka
1,024	43	heiBE4-Gam OlOca2_T1	medaka
5,219	43	heiBE4-Gam OlOca2_T1	medaka
0	1	control	medaka
0	1	control	medaka
0	2	control	medaka
0,16	2	control	medaka
0	3	control	medaka
0	3	control	medaka
0	4	control	medaka
0	4	control	medaka
0	5	control	medaka
0	5	control	medaka
0,054	6	control	medaka
0	6	control	medaka
0	7	control	medaka
0	7	control	medaka
0,271	8	control	medaka
0	8	control	medaka
0,053	9	control	medaka
0	9	control	medaka
0	10	control	medaka
0	10	control	medaka
0	11	control	medaka
0	11	control	medaka
0	12	control	medaka
0	12	control	medaka
0,534	13	control	medaka
0,132	13	control	medaka
1,829	14	control	medaka
0,062	14	control	medaka
0	15	control	medaka
0	15	control	medaka
0	16	control	medaka
0	16	control	medaka
0,052	17	control	medaka
0	17	control	medaka
1,113	18	control	medaka
0,25	18	control	medaka
0	19	control	medaka
0	19	control	medaka
0	20	control	medaka
0	20	control	medaka
0	21	control	medaka
1,776	21	control	medaka
45,179	22	control	medaka
3,717	22	control	medaka
0	23	control	medaka
0,056	23	control	medaka
0	24	control	medaka
0	24	control	medaka
0,098	25	control	medaka
0	25	control	medaka
0	26	control	medaka
0	26	control	medaka
0	27	control	medaka
0,399	27	control	medaka
0	28	control	medaka
0	28	control	medaka
0	29	control	medaka
0	29	control	medaka
1,4	30	control	medaka
0	30	control	medaka
0	31	control	medaka
0	31	control	medaka
0	32	control	medaka
0	32	control	medaka
0	33	control	medaka
0	33	control	medaka
0	34	control	medaka
0	34	control	medaka
96,816	1	BE4-Gam OlOca2_T3	medaka
93,55	1	BE4-Gam OlOca2_T3	medaka
80,935	2	BE4-Gam OlOca2_T3	medaka
17,256	2	BE4-Gam OlOca2_T3	medaka
88,862	3	BE4-Gam OlOca2_T3	medaka
160,098	3	BE4-Gam OlOca2_T3	medaka
71,3	4	BE4-Gam OlOca2_T3	medaka
23,936	4	BE4-Gam OlOca2_T3	medaka
131,853	5	BE4-Gam OlOca2_T3	medaka
38,672	5	BE4-Gam OlOca2_T3	medaka
54,237	6	BE4-Gam OlOca2_T3	medaka
106,097	6	BE4-Gam OlOca2_T3	medaka
78,855	7	BE4-Gam OlOca2_T3	medaka
103,044	7	BE4-Gam OlOca2_T3	medaka
76,348	8	BE4-Gam OlOca2_T3	medaka
123,047	8	BE4-Gam OlOca2_T3	medaka
13,369	9	BE4-Gam OlOca2_T3	medaka
0,309	9	BE4-Gam OlOca2_T3	medaka
56,052	10	BE4-Gam OlOca2_T3	medaka
122,323	10	BE4-Gam OlOca2_T3	medaka
157,353	11	BE4-Gam OlOca2_T3	medaka
110,626	11	BE4-Gam OlOca2_T3	medaka
94,28	12	BE4-Gam OlOca2_T3	medaka
132,728	12	BE4-Gam OlOca2_T3	medaka
94,029	13	BE4-Gam OlOca2_T3	medaka
85,763	13	BE4-Gam OlOca2_T3	medaka
150	14	BE4-Gam OlOca2_T3	medaka
145,753	14	BE4-Gam OlOca2_T3	medaka
135,104	15	BE4-Gam OlOca2_T3	medaka
175,302	15	BE4-Gam OlOca2_T3	medaka
104,381	16	BE4-Gam OlOca2_T3	medaka
144,3	16	BE4-Gam OlOca2_T3	medaka
128,922	17	BE4-Gam OlOca2_T3	medaka
137,061	17	BE4-Gam OlOca2_T3	medaka
44,142	18	BE4-Gam OlOca2_T3	medaka
62,651	18	BE4-Gam OlOca2_T3	medaka
36,505	19	BE4-Gam OlOca2_T3	medaka
50,837	19	BE4-Gam OlOca2_T3	medaka
201,461	20	BE4-Gam OlOca2_T3	medaka
182,659	20	BE4-Gam OlOca2_T3	medaka
112,866	21	BE4-Gam OlOca2_T3	medaka
58,875	21	BE4-Gam OlOca2_T3	medaka
52,241	22	BE4-Gam OlOca2_T3	medaka
80,154	22	BE4-Gam OlOca2_T3	medaka
81,893	23	BE4-Gam OlOca2_T3	medaka
187,861	23	BE4-Gam OlOca2_T3	medaka
131,086	24	BE4-Gam OlOca2_T3	medaka
72,754	24	BE4-Gam OlOca2_T3	medaka
152,224	25	BE4-Gam OlOca2_T3	medaka
176,006	25	BE4-Gam OlOca2_T3	medaka
48,838	26	BE4-Gam OlOca2_T3	medaka
74,472	26	BE4-Gam OlOca2_T3	medaka
143,764	27	BE4-Gam OlOca2_T3	medaka
145,219	27	BE4-Gam OlOca2_T3	medaka
105,652	28	BE4-Gam OlOca2_T3	medaka
98,336	28	BE4-Gam OlOca2_T3	medaka
105,771	29	BE4-Gam OlOca2_T3	medaka
70,202	29	BE4-Gam OlOca2_T3	medaka
13,02	30	BE4-Gam OlOca2_T3	medaka
30,011	30	BE4-Gam OlOca2_T3	medaka
82,345	31	BE4-Gam OlOca2_T3	medaka
101,784	31	BE4-Gam OlOca2_T3	medaka
77,664	32	BE4-Gam OlOca2_T3	medaka
97,636	32	BE4-Gam OlOca2_T3	medaka
92,416	33	BE4-Gam OlOca2_T3	medaka
184,856	33	BE4-Gam OlOca2_T3	medaka
92,778	34	BE4-Gam OlOca2_T3	medaka
75,522	34	BE4-Gam OlOca2_T3	medaka
63,702	35	BE4-Gam OlOca2_T3	medaka
99,431	35	BE4-Gam OlOca2_T3	medaka
49,143	36	BE4-Gam OlOca2_T3	medaka
111,353	36	BE4-Gam OlOca2_T3	medaka
38,516	37	BE4-Gam OlOca2_T3	medaka
41,532	37	BE4-Gam OlOca2_T3	medaka
124,114	1	heiBE4-Gam OlOca2_T3	medaka
114,637	1	heiBE4-Gam OlOca2_T3	medaka
175,011	2	heiBE4-Gam OlOca2_T3	medaka
209,43	2	heiBE4-Gam OlOca2_T3	medaka
173,068	3	heiBE4-Gam OlOca2_T3	medaka
199,8	3	heiBE4-Gam OlOca2_T3	medaka
148,661	4	heiBE4-Gam OlOca2_T3	medaka
188,489	4	heiBE4-Gam OlOca2_T3	medaka
171,433	5	heiBE4-Gam OlOca2_T3	medaka
158,559	5	heiBE4-Gam OlOca2_T3	medaka
202,53	6	heiBE4-Gam OlOca2_T3	medaka
144,696	6	heiBE4-Gam OlOca2_T3	medaka
178,297	7	heiBE4-Gam OlOca2_T3	medaka
86,515	7	heiBE4-Gam OlOca2_T3	medaka
173,067	8	heiBE4-Gam OlOca2_T3	medaka
99,967	8	heiBE4-Gam OlOca2_T3	medaka
133,702	9	heiBE4-Gam OlOca2_T3	medaka
100,121	9	heiBE4-Gam OlOca2_T3	medaka
189,48	10	heiBE4-Gam OlOca2_T3	medaka
148,443	10	heiBE4-Gam OlOca2_T3	medaka
170,375	11	heiBE4-Gam OlOca2_T3	medaka
193,361	11	heiBE4-Gam OlOca2_T3	medaka
169,874	12	heiBE4-Gam OlOca2_T3	medaka
178,386	12	heiBE4-Gam OlOca2_T3	medaka
214,382	13	heiBE4-Gam OlOca2_T3	medaka
166,873	13	heiBE4-Gam OlOca2_T3	medaka
172,848	14	heiBE4-Gam OlOca2_T3	medaka
159,618	14	heiBE4-Gam OlOca2_T3	medaka
123,988	15	heiBE4-Gam OlOca2_T3	medaka
189,603	15	heiBE4-Gam OlOca2_T3	medaka
174,339	16	heiBE4-Gam OlOca2_T3	medaka
149,073	16	heiBE4-Gam OlOca2_T3	medaka
105,482	17	heiBE4-Gam OlOca2_T3	medaka
79,611	17	heiBE4-Gam OlOca2_T3	medaka
48,737	18	heiBE4-Gam OlOca2_T3	medaka
87,627	18	heiBE4-Gam OlOca2_T3	medaka
187,983	19	heiBE4-Gam OlOca2_T3	medaka
130,918	19	heiBE4-Gam OlOca2_T3	medaka
208,716	20	heiBE4-Gam OlOca2_T3	medaka
169,306	20	heiBE4-Gam OlOca2_T3	medaka
144,945	21	heiBE4-Gam OlOca2_T3	medaka
152,411	21	heiBE4-Gam OlOca2_T3	medaka
190,362	22	heiBE4-Gam OlOca2_T3	medaka
207,664	22	heiBE4-Gam OlOca2_T3	medaka
202,514	23	heiBE4-Gam OlOca2_T3	medaka
192,393	23	heiBE4-Gam OlOca2_T3	medaka
99,412	24	heiBE4-Gam OlOca2_T3	medaka
153,441	24	heiBE4-Gam OlOca2_T3	medaka
140,341	25	heiBE4-Gam OlOca2_T3	medaka
172,673	25	heiBE4-Gam OlOca2_T3	medaka
195,355	26	heiBE4-Gam OlOca2_T3	medaka
207,494	26	heiBE4-Gam OlOca2_T3	medaka
205,232	27	heiBE4-Gam OlOca2_T3	medaka
193,745	27	heiBE4-Gam OlOca2_T3	medaka
163,863	28	heiBE4-Gam OlOca2_T3	medaka
161,52	28	heiBE4-Gam OlOca2_T3	medaka
