# Supplementary material for: Boosting targeted genome editing using the hei-tag
Source: eLife journal article supplement (doi:10.7554/elife.70558), 2022-03-25
Supplement: figures [file elife-70558-figures-v3.pdf]

---

## Figures and figure supplements

Boosting targeted genome editing using the hei-tag

**Thomas Thumberger *et al***

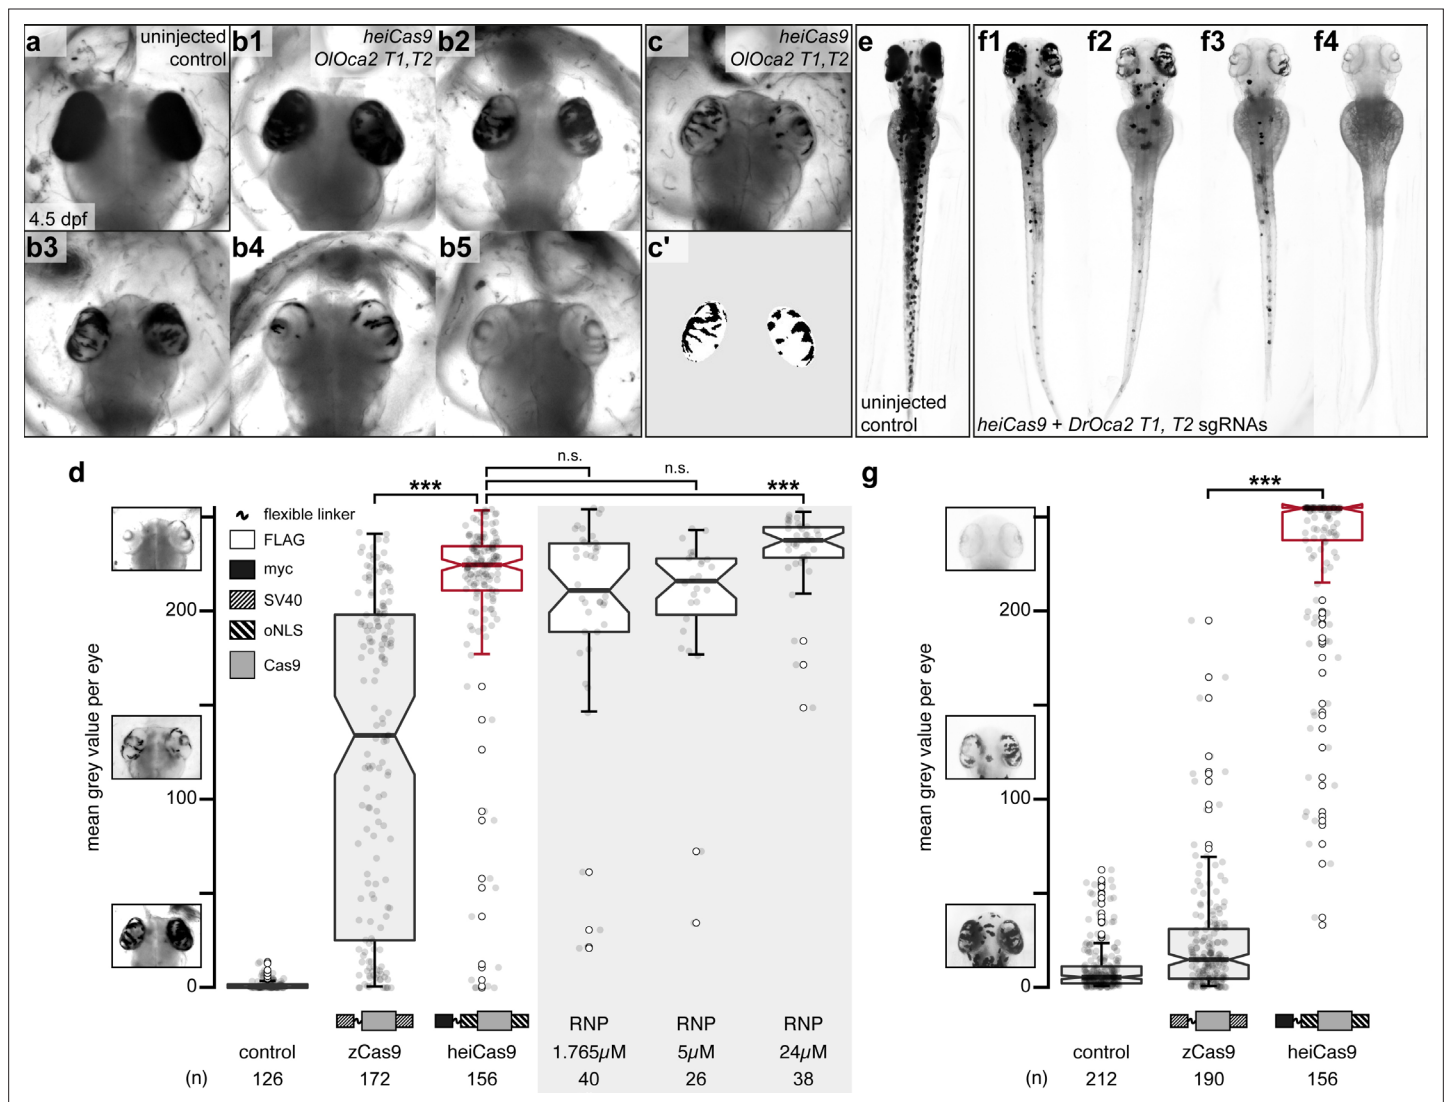

**Figure 1.** *heiCas9* exhibits outstanding bi-allelic targeting activity in fish. Phenotypic range and quantification of *OIOca2 T1, T2* and *DrOca2 T1, T2* sgRNAs/*Cas9* variant and sgRNA/*Cas9* protein complex (ribonucleoprotein [RNP])-mediated loss of pigmentation in medaka (a–d) and zebrafish (e–g) at high concentrations. (a) Fully pigmented eyes in uninjected control medaka embryo at 4.5 dpf. (b1–b5) Range of typically observed loss-of-pigmentation phenotypes upon injection with 150ng/μl *heiCas9* mRNA and 30ng/μl *OIOca2 T1, T2* sgRNAs. The observed phenotypes range from almost full pigmentation (b1) to completely unpigmented eyes (b5). (c) Minimum intensity projection of a medaka embryo at 4.5 days after injection with 150ng/μl *heiCas9* and 30ng/μl *OIOca2 T1, T2* sgRNAs. (c') Locally thresholded pigmentation on elliptical selection per eye (same embryo as in c). (d) Quantification of mean gray values (0 = fully pigmented, 255 = completely unpigmented) of individual eyes from *Oca2* knock-out medaka crispants co-injected with 30ng/μl *OIOca2 T1, T2* sgRNAs and 150ng/μl mRNAs of *zCas9* and *heiCas9* (red) compared to RNP injections (concentrations indicated). Medians: uninjected control = 0.4; *zCas9* = 134.5; *heiCas9* = 225.3; 1.765μM RNP = 211.1; 5μM RNP = 216.2; 24μM RNP = 237.8. Note: highly significant pigment loss (70% increase) in *heiCas9* vs. *zCas9* crispants ( $p = 1.1 \times 10^{-25}$ ); *heiCas9* reaches the same knock-out efficiency compared to RNP injections with only significant differences at highest RNP concentrations (24μM). (e) Fully pigmented uninjected control zebrafish embryo at 2.5 dpf. (f1–f4) Range of typically observed loss-of-pigmentation phenotypes upon injection with 150ng/μl *heiCas9* mRNA and 30ng/μl *DrOca2 T1, T2* sgRNAs. The observed phenotypes range from almost full pigmentation (f1) to completely unpigmented eyes and body (f4). (g) Quantification of mean gray values of individual eyes from *oca2* knock-out zebrafish embryos co-injected with 30ng/μl *DrOca2 T1, T2* sgRNAs and 150ng/μl mRNAs of *zCas9* and *heiCas9* (red), respectively. Medians: uninjected control = 5.3; *zCas9* = 14.7; *heiCas9* = 254.6. Note the very highly significant pigment loss (17-fold increase) in *heiCas9* vs. *zCas9* crispants ( $p = 2.1 \times 10^{-56}$ ). dpf, days post fertilization; mean gray values ranged from 0, that is, fully pigmented eye to 255, that is, complete loss of pigmentation; n, number of eyes analyzed. Bold line, median. Statistical analysis performed in R, pairwise Wilcoxon rank sum test, Bonferroni corrected.

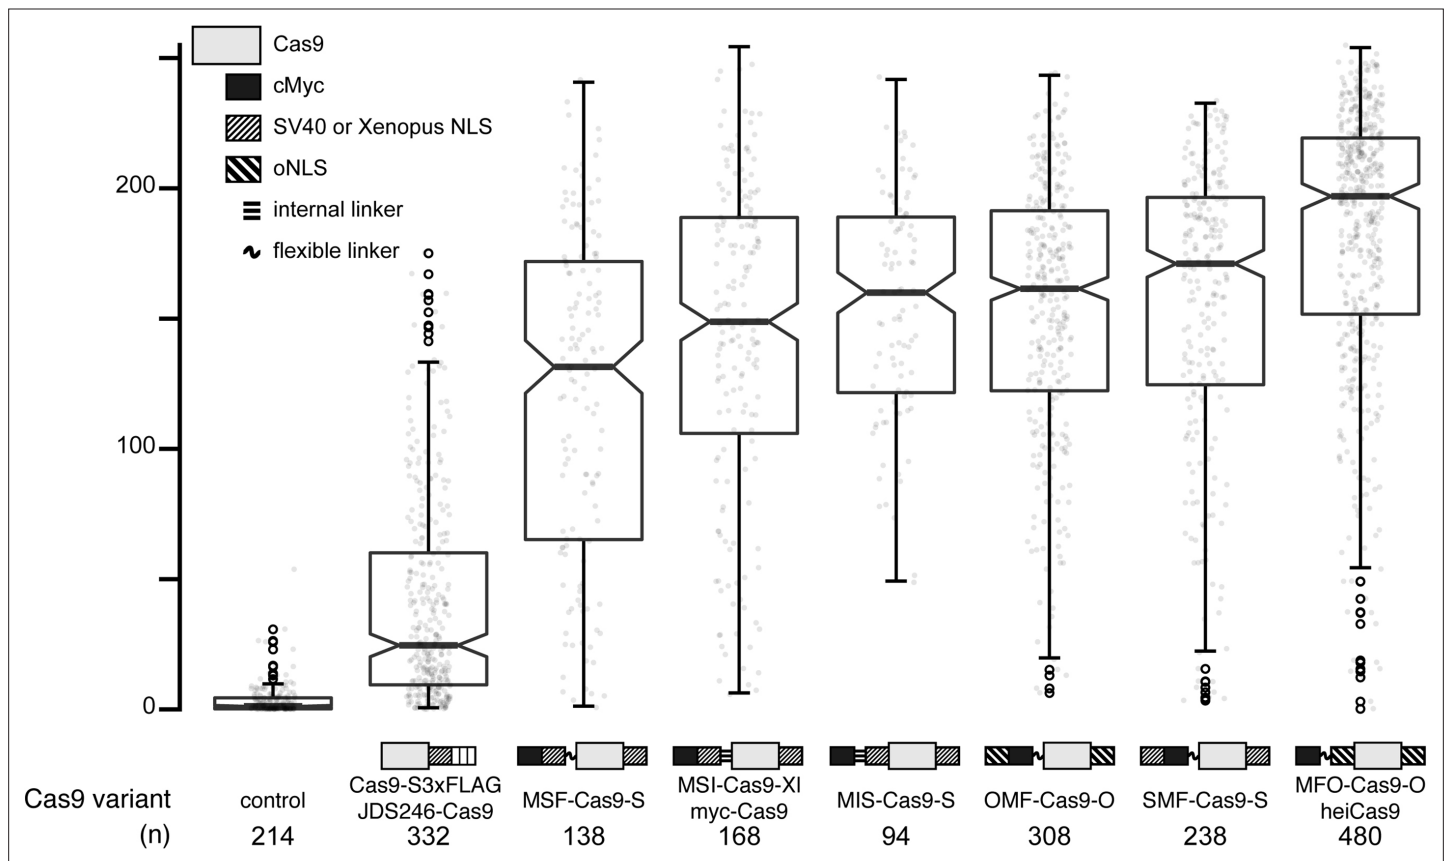

**Figure 1—figure supplement 1.** Identification of the hei-tag. Comparison of *O/Oca2* knock-out efficiency (quantification of eye pigmentation) using a permutation screen of peptide domains (nuclear localization signals [NLSs], Myc-tag, amino acid linkers) flanking a mammalian codon-optimized Cas9 enzyme. Injection mix contained 30ng/μl *O/Oca2* T1, T2, 150ng/μl tagged Cas9 variant mRNA, 20ng/μl GFP mRNA injection marker. Particular peptides and relative positions indicated by schematics. Constellation of peptides sorted by knock-out efficiency. The 'hei-tag' myc-flexible-linker-oNLS-Cas9-oNLS (heiCas9) variant was identified being most efficient. JDS246-Cas9 (Addgene #43861), MSI-Cas9-XI (myc-Cas9) was cloned following [Zhang et al., 2014](#). Peptides used: FLAG, FLAG tag; F, flexible linker; I, internal linker; M, cMyc-tag; O, optimized NLS ([Inoue et al., 2016](#)); S, SV40 NLS ([Kalderon et al., 1984](#)); XI, bipartite *Xenopus laevis* nucleoplasmin NLS ([Dingwall et al., 1988](#)). For sequences, see [Supplementary files 1 and 2](#). 0 = fully pigmented, 255 = completely unpigmented; n, number of eyes analyzed.

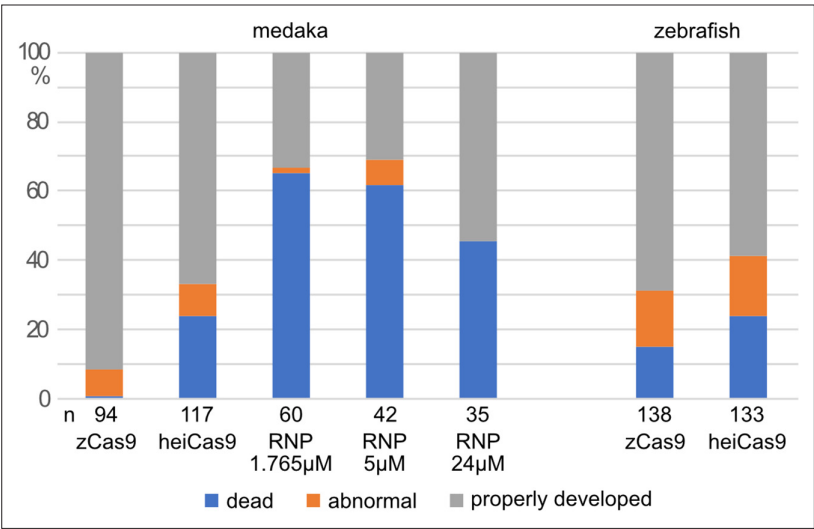

**Figure 1—figure supplement 2.** Survival and abnormality rate of Cas9 mRNA and ribonucleoprotein (RNP) injections. Percentage of dead, abnormal (e.g. delayed development or malformation), and properly developed injected embryos. Only properly developed embryos were included for analysis. n, total number of injected embryos.

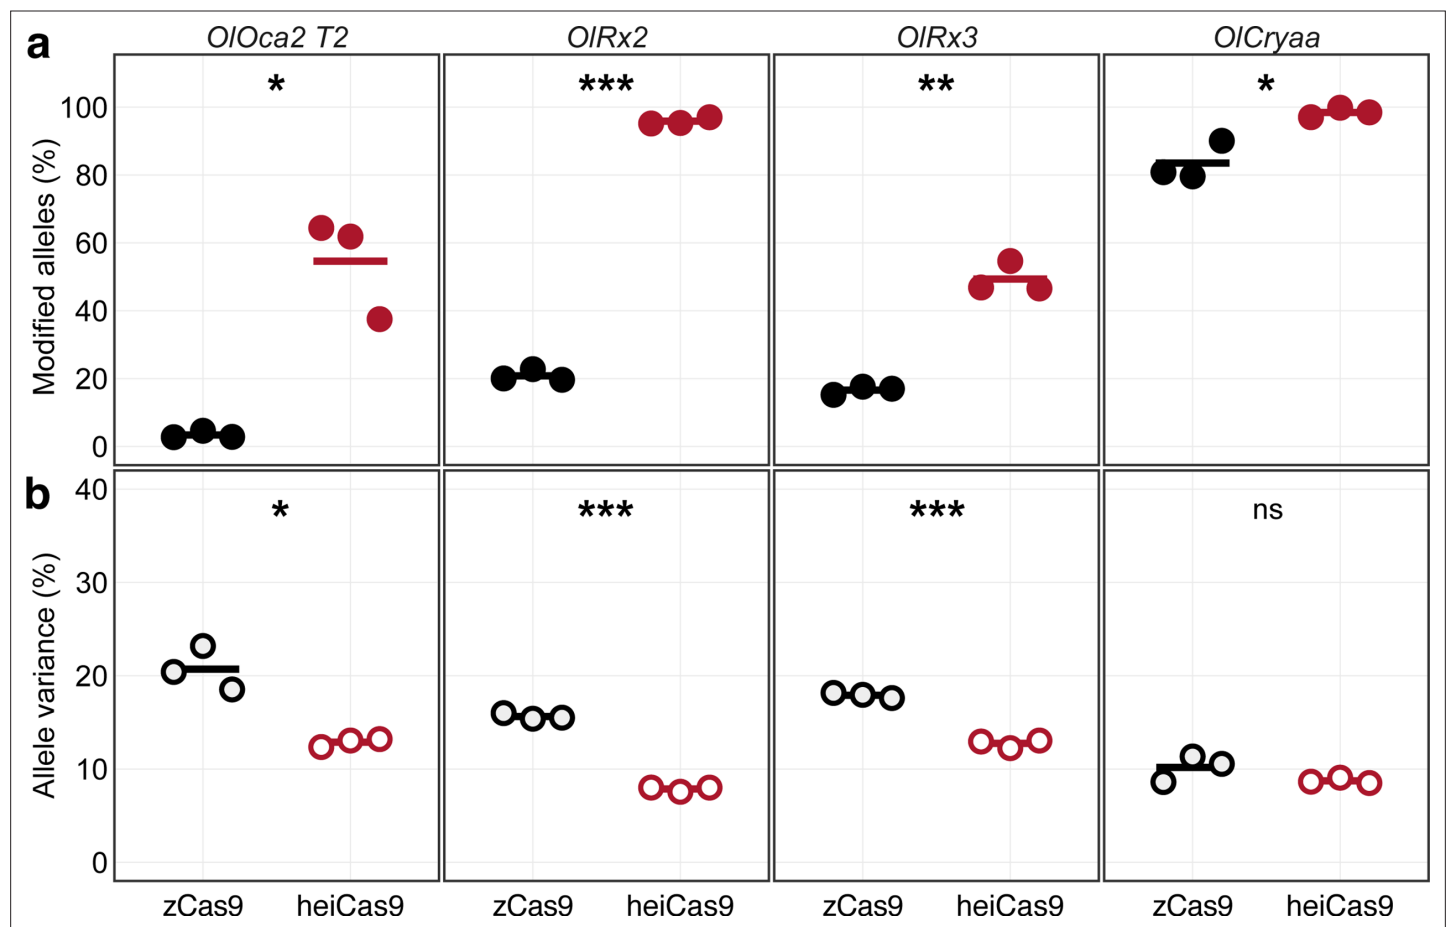

**Figure 2.** Increased knock-out activity and reduced allele variance in heiCas9 crispants. Multiplexed injections with 15ng/μl mRNA of zCas9 or heiCas9 (red) mRNA and 12.5ng/μl per sgRNA targeting exonic sequences in *oculocutaneous albinism type 2* (*oca2*; *OIOca2 T2*), the start codons of the *retina-specific homeobox transcription factor 2* (*rx2*; *OIRx2*) and of the *alpha a crystallin* (*cryaa*; *OICryaa*), as well as an intronic sequence in *rx3* (*OIRx3*). Illumina sequencing performed on three biological replicates (eight embryos each) per targeted locus. **(a)** Increased knock-out efficiency in heiCas9 crispants as shown by proportion of modified over all Illumina sequencing reads per replicate and locus. **(b)** Reduced allele variance in heiCas9 crispants as shown by abundance of specific allele divided by all modified alleles per replicate and locus. Bold line, mean values of zCas9 (black) and heiCas9 (red). Total aligned Illumina reads analyzed: *OIOca2*: zCas9 = 194,931, heiCas9 = 180,222; *OIRx2*: zCas9 = 224,146, heiCas9 = 269,103; *OIRx3*: zCas9 = 195,248, heiCas9 = 175,044; *OICryaa*: zCas9 = 209,573, heiCas9 = 200,448. Statistical analysis performed in R, Student's t-test.

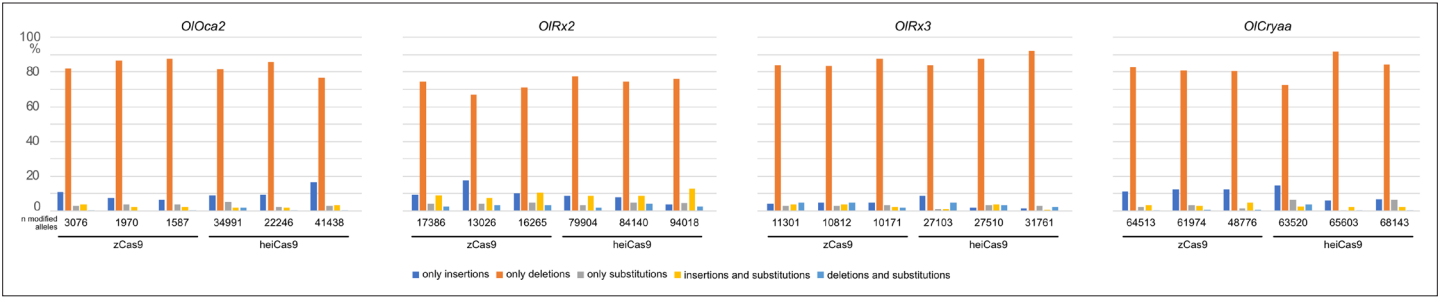

**Figure 2—figure supplement 1.** Mode of editing of all modified alleles. Relative abundance of Illumina reads categorized by mode of editing among all modified alleles per replicate, locus (*OIOca2*, *OIRx2*, *OIRx3*, *OICryaa*) and *Cas9* mRNA employed (zCas9, heiCas9). Categories: only insertions, only deletions, only substitutions, insertions and substitutions, deletions and substitutions. n, total number of aligned modified Illumina reads per replicate.

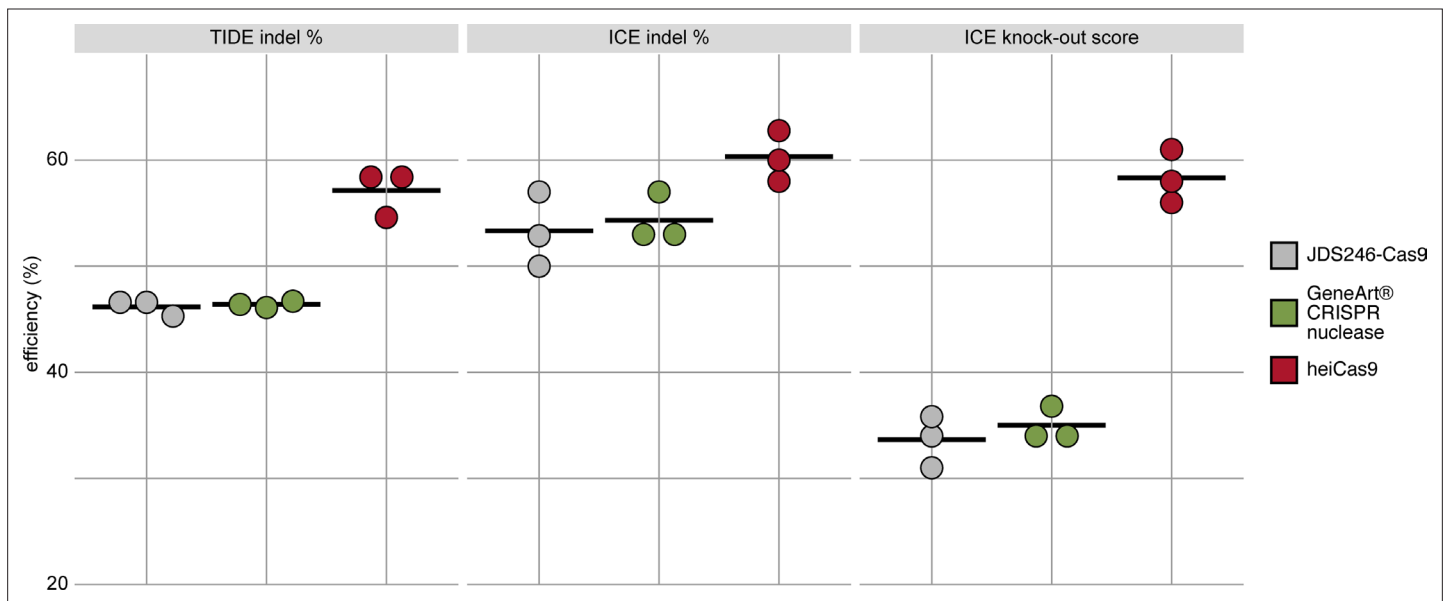

**Figure 3.** *heiCas9* consistently exhibits high genome editing efficiency in mammalian cells. Mouse SW10 cells were co-transfected with *MmPrx* crRNA and mRNAs of *JDS246-Cas9*, *GeneArt CRISPR nuclease*, and *heiCas9*, respectively. Genome editing efficiency was assessed by Tracking of Indels by Decomposition (TIDE) and Inference of CRISPR Editing (ICE) tools. ICE knock-out score represents proportion of indels that indicate a frameshift or  $\geq 21$ bp deletion. Data points represent three biological replicates, black line indicates respective mean: TIDE indel %: *JDS246-Cas9* = 46.2; *GeneArt CRISPR nuclease* = 46.4, *heiCas9* = 57.1; ICE indel %: *JDS246-Cas9* = 53.3; *GeneArt CRISPR nuclease* = 54.3, *heiCas9* = 60.3; ICE knock-out score %: *JDS246-Cas9* = 33.7; *GeneArt CRISPR nuclease* = 35.0, *heiCas9* = 58.3.  $R^2 > 0.9$  (TIDE) and  $> 0.9$  (ICE) for all mRNAs tested. For representative indel spectrum for each mRNA, see **Figure 3—figure supplement 1**.

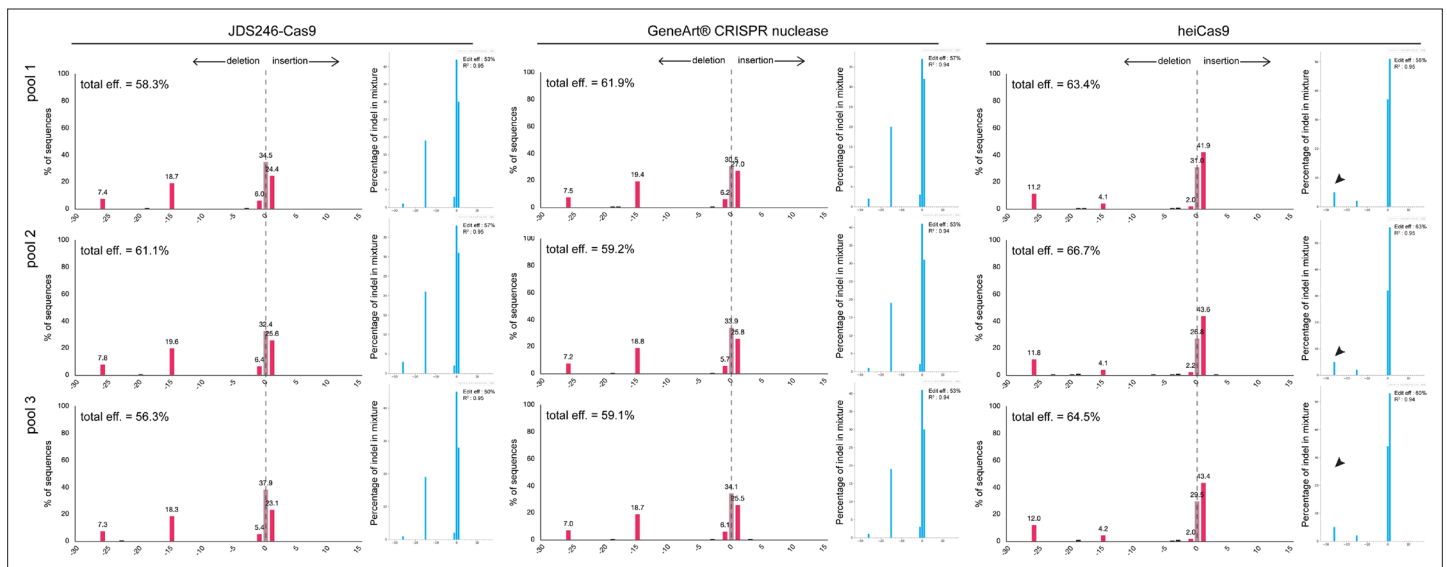

**Figure 3—figure supplement 1.** Representative indel spectrum for each Cas9 mRNA used in the cell culture assay. Indel spectrum diagram obtained from Tracking of Indels by Decomposition (TIDE) (red bargraphs) and Inference of CRISPR Editing (ICE) (blue bargraphs) analyses following *JDS246-Cas9* mRNA, *GeneArt CRISPR nuclease* mRNA, and *heiCas9* mRNA and *Prx* tracrRNA/crRNA transfections. Note decreased number of wild-type alleles (gray dashed line in TIDE analysis) in *heiCas9*-transfected cells and increased abundance of 26 nt deletion (black arrowhead in ICE analysis).



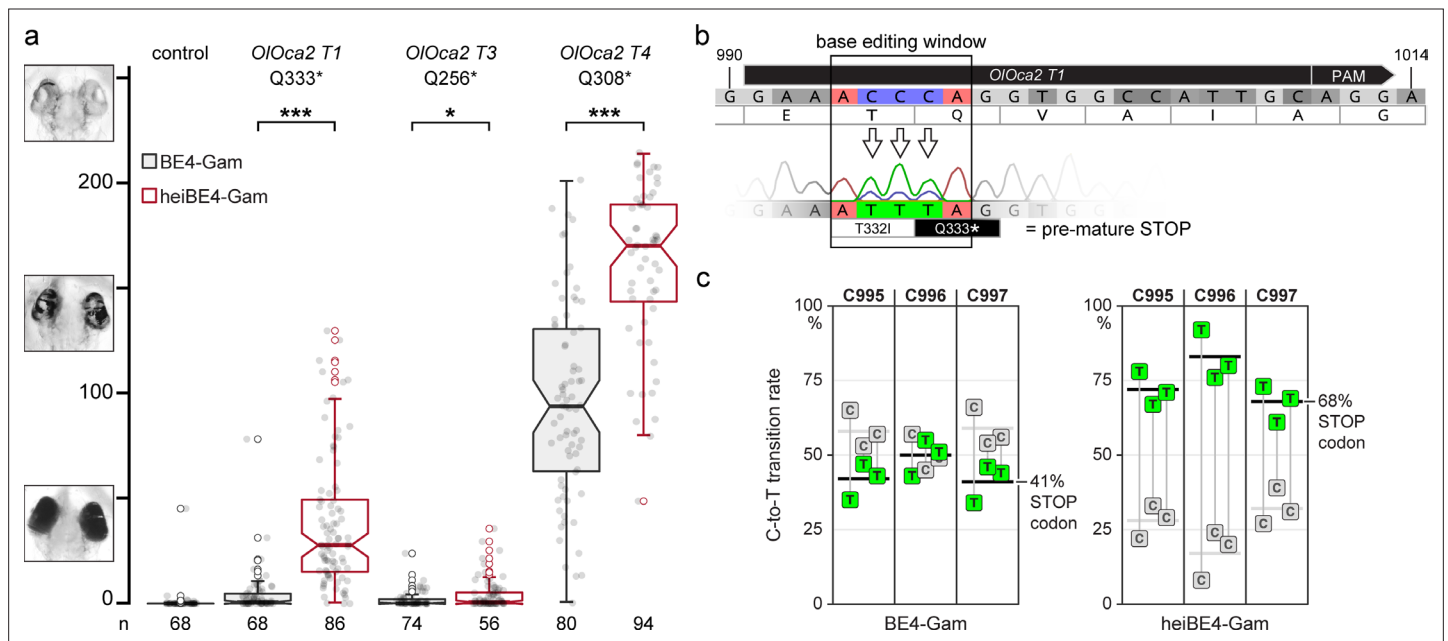

**Figure 4.** heiBE4-Gam mediates highly efficient cytosine-to-thymine (C-to-T) transitions in medaka embryos. Phenotypic range and quantification of heiBE4-Gam-mediated C-to-T transitions in medaka embryos. **(a)** Categories of typically observed loss-of-pigmentation phenotypes in *oca2* editants. The observed pigmentation phenotypes range from (almost) unpigmented eyes, that is, a very strong knock-out (top panel) over intermediate (central panel) to no loss of pigmentation (bottom panel). Quantification of phenotype resulting from injections with either BE4-Gam or heiBE4-Gam (red) mRNA and *OIOca2 T1*, *T3*, or *T4* sgRNAs. Note: dramatic increase of bi-allelic knock-out rate when using heiBE4-Gam. n, number of eyes analyzed. Control median = 0.0; medians BE4-Gam vs. heiBE4-Gam: *OIOca2 T1*, 0.6 vs. 28.0,  $p = 1.737$ ; *OIOca2 T3*, 0.0 vs. 0.8,  $p = 0.0471$ ; *OIOca2 T4*, 93.8 vs. 170.1,  $p = 5.215e-12$ . Bold lines, median values. Statistical analysis performed in R, pairwise Wilcoxon rank sum test. **(b)** Schematic representation of base editing window in *OIOca2 T1* target site (PAM, protospacer adjacent motif). C-to-T transition of C995 and C996 edits the threonine (T) codon to isoleucine (I) (T332I); C997T creates a pre-mature STOP codon (Q333\*). Nucleotide positions refer to the *oca2* open reading frame. **(c)** Quantification of Sanger sequencing reads at nucleotides C995, C996, C997 inside the base editing window of three injected embryo pools (five embryos each) reveals overall dramatic increase of C-to-T base transition when using heiBE4-Gam. Note 1.7-fold increase of C997T transition, that is, efficient introduction of a pre-mature STOP codon. Mean values indicated by bold horizontal lines, **Figure 4—figure supplement 1**.

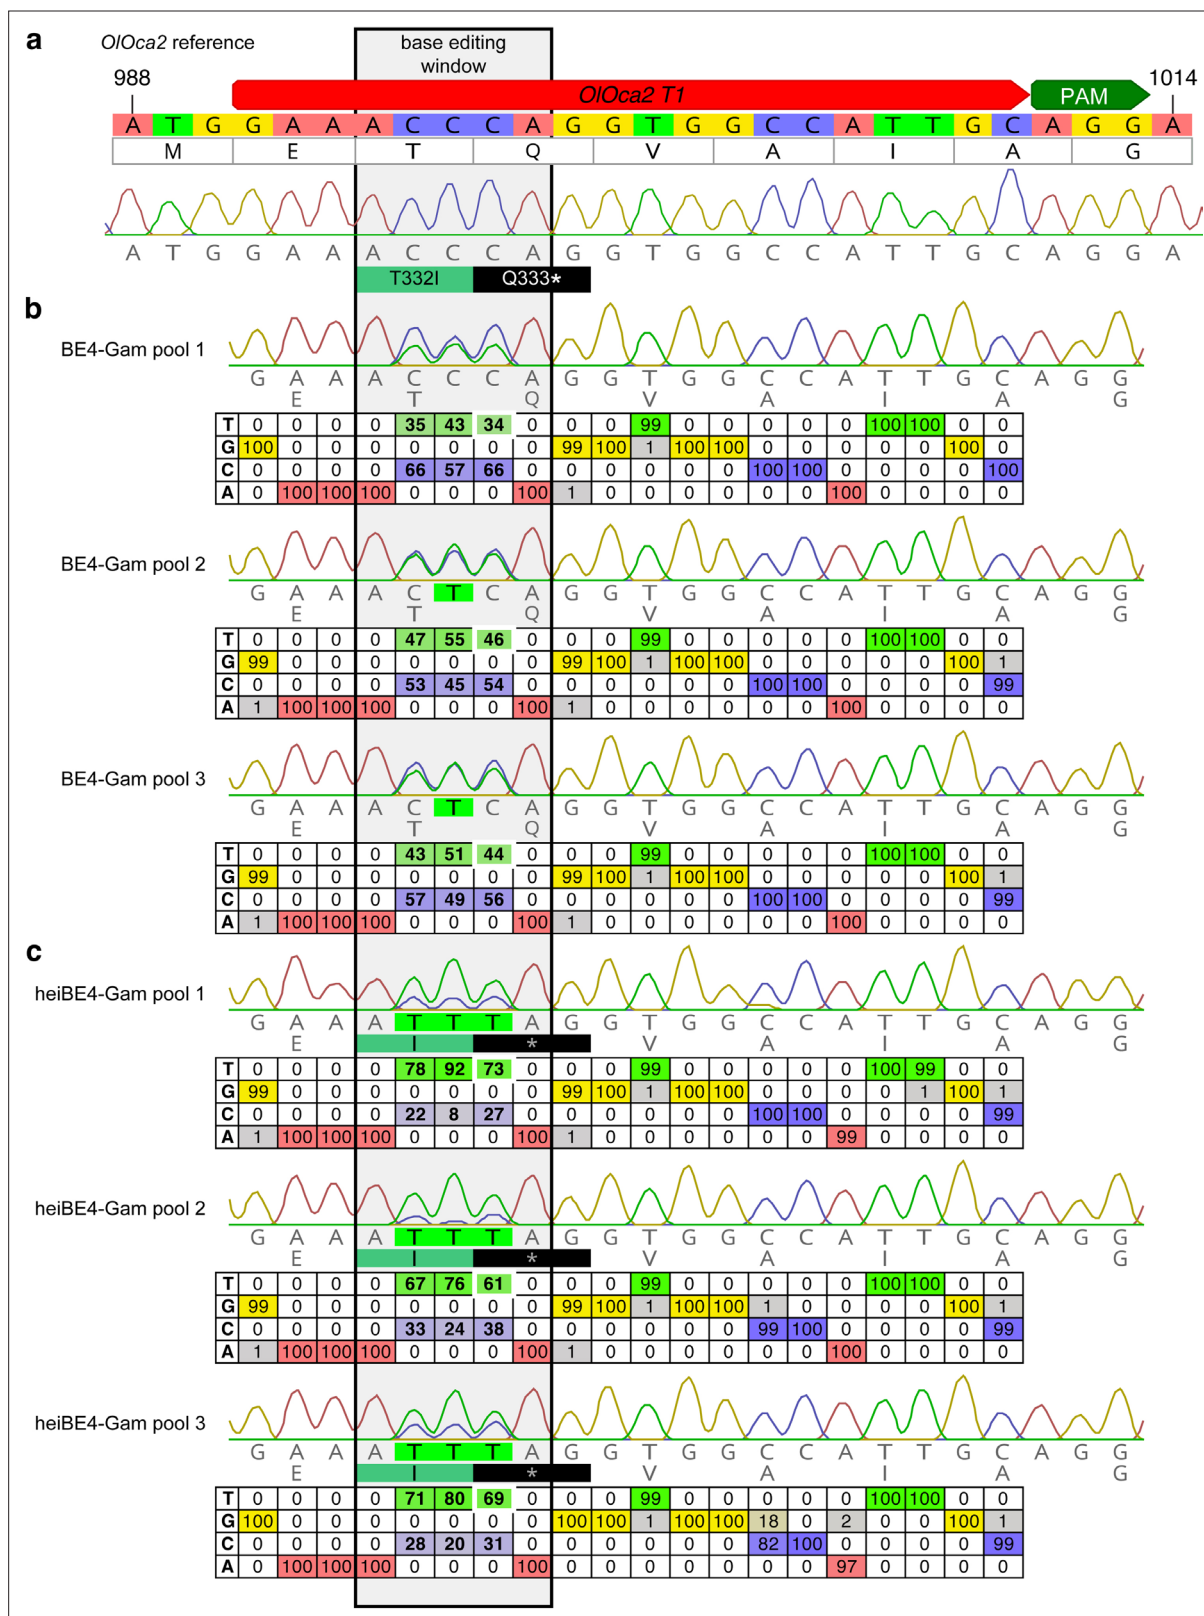

**Figure 4—figure supplement 1.** Increased cytosine-to-thymine (C-to-T) transition in medaka embryo pools injected with *heiBE4-Gam*. (a) Schematic representation of base editing window in *O/Oca2* T1 target site. (b–c) Sanger sequencing quantifications (EditR; Kluesner et al., 2018) of pools of five randomly picked embryos injected with sgRNA *O/Oca2* T1 and either *BE4-Gam* (b) or *heiBE4-Gam* (c). Note: in *heiBE4-Gam* injections, for each cytosine, the C-to-T transition rate was higher than 60%, a level never observed in *BE4-Gam*-injected embryos. C997T is highlighted with white frame.
