# Supplementary material for: Boosting targeted genome editing using the hei-tag
Source: eLife journal article supplement (doi:10.7554/elife.70558), 2022-03-25
Supplement: supp [file elife-70558-supp-v1.zip]

|           |   |   |   |   |   |   |   |   |   |   |   |   |   |   |          |          |          |          |          |          |          |          |          |          |          |          |          |          |          |          |          |          |          |          |          |          |          |          |                   |                   |                      |                   |                   |
|-----------|---|---|---|---|---|---|---|---|---|---|---|---|---|---|----------|----------|----------|----------|----------|----------|----------|----------|----------|----------|----------|----------|----------|----------|----------|----------|----------|----------|----------|----------|----------|----------|----------|----------|-------------------|-------------------|----------------------|-------------------|-------------------|
| C         | C | A | T | T | G | C | A | G | G | A | A | T | C | A | T        | T        | C        | T        | G        | T        | G        | T        | G        | G        | G        | G        | T        | C        | T        | A        | C        | A        | T        | T        | C        | T        | C        | A        | T                 | -                 | Reference            |                   |                   |
| OIOca2 T2 |   |   |   |   |   |   |   |   |   |   |   |   |   |   |          |          |          |          |          |          |          |          |          |          |          |          |          |          |          |          |          |          |          |          |          |          |          |          |                   |                   |                      |                   |                   |
| C         | C | A | T | T | G | C | A | G | G | A | A | T | C | A | T        | T        | C        | T        | G        | T        | G        | T        | G        | G        | G        | G        | T        | C        | T        | A        | C        | A        | T        | T        | C        | T        | C        | A        | T                 | -                 | 36.34% (20556 reads) |                   |                   |
| C         | C | A | T | T | G | C | A | G | G | A | A | T | C | A | T        | T        | C        | T        | G        | -        | -        | T        | G        | G        | G        | G        | T        | C        | T        | A        | C        | A        | T        | T        | C        | T        | C        | A        | T                 | -                 | 30.82% (17438 reads) |                   |                   |
| C         | C | A | T | T | G | C | A | G | G | A | A | T | C | A | T        | T        | C        | T        | G        | -        | -        | -        | -        | G        | G        | G        | T        | C        | T        | A        | C        | A        | T        | T        | C        | T        | C        | A        | T                 | -                 | 1.73% (978 reads)    |                   |                   |
| C         | C | A | T | T | G | C | A | G | G | A | A | T | C | A | T        | T        | C        | T        | G        | -        | -        | -        | -        | -        | -        | -        | -        | -        | -        | -        | -        | -        | -        | -        | -        | -        | -        | -        | -                 | -                 | 1.58% (896 reads)    |                   |                   |
| -         | - | - | - | - | - | - | - | - | - | - | - | - | - | - | -        | -        | -        | -        | -        | -        | -        | T        | G        | G        | G        | G        | T        | C        | T        | A        | C        | A        | T        | T        | C        | T        | C        | A        | T                 | -                 | 1.56% (883 reads)    |                   |                   |
| C         | C | A | T | T | G | C | A | G | G | A | A | T | C | A | T        | T        | C        | T        | -        | -        | -        | -        | -        | -        | -        | -        | -        | -        | -        | -        | -        | -        | -        | -        | -        | -        | -        | -        | -                 | -                 | 1.34% (757 reads)    |                   |                   |
| C         | C | A | T | T | G | C | A | G | G | A | A | T | C | A | T        | T        | C        | T        | <b>C</b> | -        | -        | -        | -        | <b>A</b> | <b>T</b> | T        | C        | T        | A        | C        | A        | T        | T        | C        | T        | C        | A        | T        | -                 | 1.07% (607 reads) |                      |                   |                   |
| C         | - | - | - | - | - | - | - | - | - | - | - | - | - | - | -        | -        | -        | -        | -        | -        | -        | -        | -        | G        | T        | C        | T        | A        | C        | A        | T        | T        | C        | T        | C        | A        | T        | -        | 0.97% (549 reads) |                   |                      |                   |                   |
| C         | C | A | T | T | G | C | A | G | G | A | A | T | C | A | T        | T        | C        | <b>A</b> | <b>G</b> | <b>G</b> | <b>A</b> | <b>A</b> | <b>T</b> | <b>G</b> | <b>T</b> | <b>G</b> | <b>G</b> | <b>G</b> | <b>T</b> | <b>C</b> | <b>T</b> | <b>A</b> | <b>C</b> | <b>A</b> | <b>T</b> | <b>T</b> | <b>C</b> | <b>T</b> | <b>C</b>          | <b>A</b>          | <b>T</b>             | -                 | 0.91% (513 reads) |
| C         | C | A | T | T | G | C | A | G | G | A | A | T | C | A | T        | -        | -        | -        | -        | -        | -        | -        | G        | G        | G        | G        | T        | C        | T        | A        | C        | A        | T        | T        | C        | T        | C        | A        | T                 | -                 | 0.76% (428 reads)    |                   |                   |
| C         | C | A | T | T | G | C | A | G | G | A | A | T | C | A | T        | T        | -        | -        | -        | -        | -        | G        | T        | G        | G        | G        | G        | T        | C        | T        | A        | C        | A        | T        | T        | C        | T        | C        | A                 | T                 | -                    | 0.71% (399 reads) |                   |
| C         | C | A | T | T | G | C | A | G | G | A | A | T | C | A | T        | T        | C        | T        | G        | -        | -        | <b>G</b> | G        | G        | G        | G        | T        | C        | T        | A        | C        | A        | T        | T        | C        | T        | C        | A        | T                 | -                 | 0.69% (392 reads)    |                   |                   |
| C         | C | A | T | T | G | C | A | G | G | A | A | T | C | A | T        | T        | C        | T        | -        | T        | G        | T        | G        | G        | G        | G        | T        | C        | T        | A        | C        | A        | T        | T        | C        | T        | C        | A        | T                 | -                 | 0.69% (390 reads)    |                   |                   |
| C         | C | A | T | T | G | C | A | G | G | A | A | T | C | A | T        | T        | C        | T        | <b>A</b> | <b>T</b> | <b>G</b> | <b>G</b> | <b>G</b> | <b>G</b> | <b>G</b> | <b>T</b> | <b>C</b> | <b>T</b> | <b>A</b> | <b>C</b> | <b>A</b> | <b>T</b> | <b>T</b> | <b>C</b> | <b>T</b> | <b>C</b> | <b>A</b> | <b>T</b> | -                 | 0.64% (362 reads) |                      |                   |                   |
| C         | C | A | T | T | G | C | A | G | G | A | A | T | C | A | <b>A</b> | <b>C</b> | <b>A</b> | <b>T</b> | <b>T</b> | <b>C</b> | <b>C</b> | <b>T</b> | <b>G</b> | <b>C</b> | <b>A</b> | <b>A</b> | <b>A</b> | <b>G</b> | <b>G</b> | <b>T</b> | <b>C</b> | <b>T</b> | <b>A</b> | <b>C</b> | <b>A</b> | <b>T</b> | <b>T</b> | <b>C</b> | <b>T</b>          | -                 | 0.59% (335 reads)    |                   |                   |
| C         | C | A | T | T | G | C | A | G | G | A | A | T | C | A | T        | T        | C        | T        | G        | -        | -        | -        | G        | G        | G        | G        | T        | C        | T        | A        | C        | A        | T        | T        | C        | T        | C        | A        | T                 | -                 | 0.57% (324 reads)    |                   |                   |
| -         | - | - | - | - | - | - | - | - | - | - | - | - | - | - | -        | -        | -        | -        | -        | -        | T        | G        | T        | G        | G        | G        | G        | T        | C        | T        | A        | C        | A        | T        | T        | C        | T        | C        | A                 | T                 | -                    | 0.53% (301 reads) |                   |
| C         | C | A | T | T | G | C | A | G | G | - | - | - | - | - | -        | -        | -        | -        | -        | -        | -        | -        | -        | G        | G        | T        | C        | T        | A        | C        | A        | T        | T        | C        | T        | C        | A        | T        | -                 | 0.51% (286 reads) |                      |                   |                   |
| C         | C | A | T | T | G | C | A | G | G | A | A | T | C | A | T        | T        | C        | T        | -        | -        | -        | -        | -        | -        | -        | -        | -        | -        | -        | A        | C        | A        | T        | T        | C        | T        | C        | A        | T                 | -                 | 0.49% (276 reads)    |                   |                   |
| C         | C | A | T | T | G | C | A | G | G | A | A | T | C | A | T        | T        | C        | T        | G        | <b>C</b> | <b>T</b> | <b>G</b> | <b>T</b> | <b>G</b> | <b>G</b> | <b>G</b> | <b>T</b> | <b>C</b> | <b>T</b> | <b>A</b> | <b>C</b> | <b>A</b> | <b>T</b> | <b>T</b> | <b>C</b> | <b>T</b> | <b>C</b> | <b>A</b> | -                 | 0.47% (264 reads) |                      |                   |                   |
| C         | C | A | T | T | G | C | A | G | G | A | A | T | C | A | T        | -        | -        | -        | -        | -        | -        | -        | -        | -        | -        | -        | -        | -        | -        | -        | -        | -        | -        | -        | -        | -        | -        | -        | -                 | -                 | 0.41% (232 reads)    |                   |                   |
| C         | C | A | T | T | G | C | A | G | G | A | A | T | C | A | T        | -        | -        | -        | -        | -        | -        | G        | T        | G        | G        | G        | G        | T        | C        | T        | A        | C        | A        | T        | T        | C        | T        | C        | A                 | T                 | -                    | 0.39% (222 reads) |                   |
| C         | C | A | T | T | G | C | A | G | G | A | A | T | C | A | T        | T        | C        | T        | G        | -        | G        | T        | G        | G        | G        | G        | T        | C        | T        | A        | C        | A        | T        | T        | C        | T        | C        | A        | T                 | -                 | 0.39% (220 reads)    |                   |                   |
| C         | C | A | T | T | G | - | - | - | - | - | - | - | - | - | -        | -        | -        | -        | -        | -        | -        | T        | G        | G        | G        | G        | T        | C        | T        | A        | C        | A        | T        | T        | C        | T        | C        | A        | T                 | -                 | 0.36% (205 reads)    |                   |                   |
| C         | C | A | T | T | G | C | A | G | G | A | A | T | C | A | T        | T        | C        | T        | G        | -        | -        | <b>C</b> | G        | G        | G        | G        | T        | C        | T        | A        | C        | A        | T        | T        | C        | T        | C        | A        | T                 | -                 | 0.35% (200 reads)    |                   |                   |
| C         | C | A | T | T | G | C | A | G | G | A | A | T | C | A | T        | T        | C        | T        | G        | T        | G        | -        | G        | G        | G        | G        | T        | C        | T        | A        | C        | A        | T        | T        | C        | T        | C        | A        | T                 | -                 | 0.35% (200 reads)    |                   |                   |
| C         | C | A | T | T | G | C | A | G | G | A | A | T | C | A | T        | T        | <b>G</b> | <b>G</b> | <b>G</b> | <b>G</b> | <b>T</b> | <b>C</b> | <b>T</b> | <b>A</b> | <b>C</b> | <b>A</b> | <b>T</b> | <b>C</b> | <b>A</b> | <b>T</b> | <b>G</b> | <b>T</b> | <b>G</b> | <b>G</b> | <b>G</b> | <b>G</b> | <b>T</b> | <b>C</b> | <b>T</b>          | -                 | 0.31% (178 reads)    |                   |                   |
| C         | C | A | T | T | G | C | A | G | G | A | A | T | C | A | T        | T        | C        | <b>A</b> | -        | T        | G        | T        | G        | G        | G        | G        | T        | C        | T        | A        | C        | A        | T        | T        | C        | T        | C        | A        | T                 | -                 | 0.26% (148 reads)    |                   |                   |
| -         | - | - | - | - | - | - | - | - | - | - | - | - | - | - | -        | -        | -        | -        | -        | -        | -        | -        | -        | G        | G        | T        | C        | T        | A        | C        | A        | T        | T        | C        | T        | C        | A        | T        | -                 | 0.26% (146 reads) |                      |                   |                   |
| C         | C | A | T | T | G | C | A | G | G | A | A | T | C | A | <b>A</b> | <b>T</b> | -        | -        | -        | -        | -        | G        | T        | G        | G        | G        | G        | T        | C        | T        | A        | C        | A        | T        | T        | C        | T        | C        | A                 | T                 | -                    | 0.26% (146 reads) |                   |
| C         | C | A | T | T | G | C | A | G | G | A | A | T | C | A | T        | T        | C        | T        | G        | <b>A</b> | <b>A</b> | <b>T</b> | <b>G</b> | <b>A</b> | <b>T</b> | <b>G</b> | <b>T</b> | <b>G</b> | <b>G</b> | <b>G</b> | <b>T</b> | <b>C</b> | <b>T</b> | <b>A</b> | <b>C</b> | <b>A</b> | <b>T</b> | <b>T</b> | -                 | 0.26% (145 reads) |                      |                   |                   |
| C         | C | A | T | T | G | C | A | G | G | A | A | T | C | A | T        | T        | C        | T        | -        | -        | -        | -        | -        | -        | -        | -        | -        | -        | -        | -        | -        | -        | -        | -        | -        | -        | -        | C        | A                 | T                 | -                    | 0.21% (119 reads) |                   |
| C         | C | A | T | T | G | C | A | G | G | A | A | T | C | - | -        | -        | -        | -        | -        | -        | -        | -        | -        | -        | -        | -        | -        | T        | A        | C        | A        | T        | T        | C        | T        | C        | A        | T        | -                 | 0.21% (116 reads) |                      |                   |                   |
| C         | C | C | A | C | A | G | A | A | T | T | C | A | A | C | A        | A        | T        | <b>C</b> | <b>T</b> | <b>C</b> | <b>T</b> | <b>G</b> | <b>T</b> | <b>G</b> | <b>G</b> | <b>G</b> | <b>T</b> | <b>C</b> | <b>T</b> | <b>A</b> | <b>C</b> | <b>A</b> | <b>T</b> | <b>T</b> | <b>C</b> | <b>T</b> | <b>C</b> | <b>A</b> | <b>T</b>          | -                 | 0.21% (116 reads)    |                   |                   |
| C         | C | A | T | T | G | C | A | G | G | A | A | T | C | A | T        | T        | -        | -        | -        | -        | -        | -        | -        | G        | G        | G        | G        | T        | C        | T        | A        | C        | A        | T        | T        | C        | T        | C        | A                 | T                 | -                    | 0.20% (114 reads) |                   |

**bold**

Substitutions

Insertions

-

Deletions

-----

Predicted cleavage position

|           |   |   |   |   |   |   |   |   |   |   |   |   |   |   |          |          |          |          |          |   |   |          |          |   |   |   |   |   |          |          |          |          |   |   |   |   |   |   |   |                   |                      |                   |   |                   |
|-----------|---|---|---|---|---|---|---|---|---|---|---|---|---|---|----------|----------|----------|----------|----------|---|---|----------|----------|---|---|---|---|---|----------|----------|----------|----------|---|---|---|---|---|---|---|-------------------|----------------------|-------------------|---|-------------------|
| C         | C | A | T | T | G | C | A | G | G | A | A | T | C | A | T        | T        | C        | T        | G        | T | G | T        | G        | T | G | G | G | T | C        | T        | A        | C        | A | T | T | C | T | C | A | T                 | -                    | Reference         |   |                   |
| OIOca2 T2 |   |   |   |   |   |   |   |   |   |   |   |   |   |   |          |          |          |          |          |   |   |          |          |   |   |   |   |   |          |          |          |          |   |   |   |   |   |   |   |                   |                      |                   |   |                   |
| C         | C | A | T | T | G | C | A | G | G | A | A | T | C | A | T        | T        | C        | T        | G        | T | G | T        | G        | G | G | G | T | C | T        | A        | C        | A        | T | T | C | T | C | A | T | -                 | 60.15% (35666 reads) |                   |   |                   |
| C         | C | A | T | T | G | C | A | G | G | A | A | T | C | A | T        | T        | C        | T        | G        | - | - | T        | G        | G | G | G | T | C | T        | A        | C        | A        | T | T | C | T | C | A | T | -                 | 21.50% (12747 reads) |                   |   |                   |
| C         | C | A | T | T | G | C | A | G | G | A | A | T | C | A | T        | T        | C        | T        | G        | G | G | T        | G        | G | T | G | G | G | G        | T        | C        | T        | A | C | A | T | T | C | T | C                 | A                    | T                 | - | 1.16% (686 reads) |
| C         | C | A | T | T | G | C | A | G | G | A | A | T | C | A | T        | T        | C        | T        | G        | - | - | -        | -        | G | G | G | T | C | T        | A        | C        | A        | T | T | C | T | C | A | T | -                 | 1.03% (609 reads)    |                   |   |                   |
| C         | C | A | T | T | G | C | A | G | G | A | A | T | C | A | T        | T        | C        | T        | G        | - | - | -        | -        | - | G | G | T | C | T        | A        | C        | A        | T | T | C | T | C | A | T | -                 | 0.85% (505 reads)    |                   |   |                   |
| C         | C | A | T | T | G | C | A | G | G | A | A | T | C | A | T        | T        | C        | T        | G        | - | - | <b>G</b> | G        | G | G | G | T | C | T        | A        | C        | A        | T | T | C | T | C | A | T | -                 | 0.84% (500 reads)    |                   |   |                   |
| C         | C | A | T | T | G | C | A | G | G | A | A | T | C | A | T        | T        | C        | T        | -        | T | G | T        | G        | G | G | G | T | C | T        | A        | C        | A        | T | T | C | T | C | A | T | -                 | 0.81% (481 reads)    |                   |   |                   |
| C         | C | A | T | T | G | C | A | G | G | A | A | T | C | A | T        | -        | -        | -        | -        | - | G | T        | G        | G | G | G | T | C | T        | A        | C        | A        | T | T | C | T | C | A | T | -                 | 0.78% (462 reads)    |                   |   |                   |
| C         | C | A | T | T | G | C | A | G | G | A | A | T | C | A | T        | T        | C        | T        | G        | - | - | -        | -        | - | - | - | - | - | -        | -        | -        | -        | - | - | - | - | - | - | - | -                 | -                    | 0.71% (420 reads) |   |                   |
| C         | C | A | T | T | G | C | A | G | G | A | A | T | C | A | T        | T        | C        | <b>A</b> | -        | T | G | T        | G        | G | G | G | T | C | T        | A        | C        | A        | T | T | C | T | C | A | T | -                 | 0.48% (286 reads)    |                   |   |                   |
| C         | C | A | T | T | G | C | A | G | G | A | A | T | C | A | T        | T        | -        | -        | -        | - | G | T        | G        | G | G | G | T | C | T        | A        | C        | A        | T | T | C | T | C | A | T | -                 | 0.44% (258 reads)    |                   |   |                   |
| C         | C | A | T | T | G | C | A | G | G | A | A | T | C | A | T        | T        | C        | T        | G        | A | T | T        | C        | C | T | G | T | G | G        | G        | T        | C        | T | A | C | A | T | T | - | 0.35% (209 reads) |                      |                   |   |                   |
| C         | C | A | T | T | G | C | A | G | G | A | A | T | C | A | T        | T        | C        | T        | G        | T | G | A        | T        | G | T | G | G | G | T        | C        | T        | A        | C | A | T | T | C | T | - | 0.35% (206 reads) |                      |                   |   |                   |
| C         | C | A | T | T | G | C | A | G | G | A | A | T | C | A | <b>A</b> | <b>A</b> | <b>A</b> | T        | G        | - | - | T        | G        | G | G | G | T | C | T        | A        | C        | A        | T | T | C | T | C | A | T | -                 | 0.34% (201 reads)    |                   |   |                   |
| C         | C | A | T | T | G | C | A | G | G | A | A | T | C | A | T        | T        | C        | T        | -        | - | - | -        | -        | - | - | - | - | - | -        | A        | C        | A        | T | T | C | T | C | A | T | -                 | 0.28% (168 reads)    |                   |   |                   |
| C         | C | A | T | T | G | C | A | G | G | A | A | T | C | A | T        | T        | C        | T        | <b>T</b> | T | G | <b>A</b> | <b>A</b> | - | - | - | T | C | <b>A</b> | <b>T</b> | <b>T</b> | <b>C</b> | T | T | C | T | C | A | T | -                 | 0.26% (157 reads)    |                   |   |                   |
| C         | C | A | T | T | G | C | A | G | G | A | A | T | C | A | T        | T        | C        | T        | G        | T | G | <b>G</b> | T        | G | G | G | G | T | C        | T        | A        | C        | A | T | T | C | T | C | A | -                 | 0.26% (154 reads)    |                   |   |                   |
| C         | C | A | T | T | G | C | A | G | G | A | A | T | C | A | T        | T        | C        | T        | G        | - | - | <b>C</b> | G        | G | G | G | T | C | T        | A        | C        | A        | T | T | C | T | C | A | T | -                 | 0.26% (154 reads)    |                   |   |                   |
| -         | - | - | - | - | - | - | - | - | - | - | - | - | - | - | -        | -        | -        | -        | -        | - | - | T        | G        | G | G | G | T | C | T        | A        | C        | A        | T | T | C | T | C | A | T | -                 | 0.22% (130 reads)    |                   |   |                   |
| C         | C | A | T | T | G | C | A | G | G | A | A | T | C | A | T        | T        | C        | T        | G        | - | - | -        | -        | - | - | - | T | C | T        | A        | C        | A        | T | T | C | T | C | A | T | -                 | 0.22% (128 reads)    |                   |   |                   |

**bold** Substitutions

Insertions

- Deletions

----- Predicted cleavage position

|           |   |   |   |   |   |   |   |   |   |   |   |   |   |   |   |   |   |   |   |   |   |   |   |   |   |   |   |   |   |   |   |   |   |   |   |   |   |   |   |                    |                      |                   |                   |                   |
|-----------|---|---|---|---|---|---|---|---|---|---|---|---|---|---|---|---|---|---|---|---|---|---|---|---|---|---|---|---|---|---|---|---|---|---|---|---|---|---|---|--------------------|----------------------|-------------------|-------------------|-------------------|
| C         | C | A | T | T | G | C | A | G | G | A | A | T | C | A | T | T | C | T | G | T | G | T | G | G | G | G | T | C | T | A | C | A | T | T | C | T | C | A | T | -                  | Reference            |                   |                   |                   |
| OIOca2 T2 |   |   |   |   |   |   |   |   |   |   |   |   |   |   |   |   |   |   |   |   |   |   |   |   |   |   |   |   |   |   |   |   |   |   |   |   |   |   |   |                    |                      |                   |                   |                   |
| C         | C | A | T | T | G | C | A | G | G | A | A | T | C | A | T | T | C | T | G | T | G | T | G | G | G | G | T | C | T | A | C | A | T | T | C | T | C | A | T | -                  | 33.72% (21701 reads) |                   |                   |                   |
| C         | C | A | T | T | G | C | A | G | G | A | A | T | C | A | T | T | C | T | G | - | - | T | G | G | G | G | T | C | T | A | C | A | T | T | C | T | C | A | T | -                  | 31.61% (20345 reads) |                   |                   |                   |
| C         | C | A | T | T | G | C | A | G | G | A | A | T | C | A | T | T | C | T | G | G | T | G | G | G | G | T | C | T | A | C | A | T | T | C | T | C | A | T | - | 6.40% (4119 reads) |                      |                   |                   |                   |
| C         | C | A | T | T | G | C | A | G | G | A | A | T | C | A | T | T | C | T | G | - | - | - | - | G | G | G | T | C | T | A | C | A | T | T | C | T | C | A | T | -                  | 4.20% (2703 reads)   |                   |                   |                   |
| C         | C | A | T | T | G | C | A | G | G | A | A | T | C | A | T | T | C | T | G | - | - | - | - | - | G | G | T | C | T | A | C | A | T | T | C | T | C | A | T | -                  | 1.47% (946 reads)    |                   |                   |                   |
| C         | C | A | T | T | G | G | G | C | C | A | T | - | - | - | - | - | - | - | - | - | - | - | - | G | G | G | T | C | T | A | C | A | T | T | C | T | C | A | T | -                  | 0.73% (470 reads)    |                   |                   |                   |
| C         | C | A | T | T | G | C | A | G | G | A | A | T | C | A | T | T | - | - | - | - | - | - | - | G | T | G | G | G | T | C | T | A | C | A | T | T | C | T | C | A                  | T                    | -                 | 0.72% (462 reads) |                   |
| C         | C | A | T | T | G | C | A | G | G | A | A | T | C | A | T | - | - | - | - | - | - | - | - | G | T | G | G | G | T | C | T | A | C | A | T | T | C | T | C | A                  | T                    | -                 | 0.71% (459 reads) |                   |
| C         | C | A | T | T | G | C | A | G | G | A | A | T | C | G | T | T | C | T | G | - | - | T | G | G | G | G | T | C | T | A | C | A | T | T | C | T | C | A | T | -                  | 0.64% (415 reads)    |                   |                   |                   |
| -         | - | - | - | - | - | - | - | - | - | - | - | - | - | - | - | - | - | - | - | - | - | - | - | - | - | - | - | - | - | - | - | - | - | - | - | - | - | - | - | -                  | 0.57% (369 reads)    |                   |                   |                   |
| -         | - | - | - | - | - | - | - | - | - | - | - | - | - | - | - | - | - | - | - | T | G | T | G | G | G | G | T | C | T | A | C | A | T | T | C | T | C | A | T | -                  | 0.57% (364 reads)    |                   |                   |                   |
| C         | C | A | T | T | G | C | A | G | G | A | A | T | C | A | T | T | G | T | T | T | T | G | G | A | C | A | G | A | C | A | G | T | G | T | G | G | G | G | T | -                  | -                    | -                 | -                 | 0.55% (355 reads) |
| C         | C | A | T | T | G | C | A | G | G | A | A | T | C | A | T | T | C | A | - | T | G | T | G | G | G | G | T | C | T | A | C | A | T | T | C | T | C | A | T | -                  | 0.51% (330 reads)    |                   |                   |                   |
| C         | C | A | T | T | G | C | A | G | G | A | A | T | C | A | T | T | C | T | G | T | G | - | G | G | G | G | T | C | T | A | C | A | T | T | C | T | C | A | T | -                  | 0.50% (324 reads)    |                   |                   |                   |
| C         | C | A | T | T | G | C | A | G | G | A | A | T | C | A | T | T | C | T | G | - | - | G | G | G | G | T | C | T | A | C | A | T | T | C | T | C | A | T | - | 0.50% (320 reads)  |                      |                   |                   |                   |
| -         | - | - | - | - | - | - | - | - | - | - | - | - | - | - | - | - | - | - | - | - | - | T | G | G | G | G | T | C | T | A | C | A | T | T | C | T | C | A | T | -                  | 0.43% (279 reads)    |                   |                   |                   |
| C         | C | A | T | T | G | C | A | G | G | A | A | T | C | A | T | T | C | T | A | T | G | T | G | G | G | G | T | C | T | A | C | A | T | T | C | T | C | A | T | -                  | 0.41% (261 reads)    |                   |                   |                   |
| C         | C | A | T | T | G | C | A | G | G | A | A | T | C | A | T | T | C | T | - | - | - | - | - | - | - | - | - | - | - | - | - | - | - | - | - | - | - | C | A | T                  | -                    | 0.38% (245 reads) |                   |                   |
| C         | C | A | T | T | G | C | A | G | G | A | A | T | C | A | T | T | C | T | G | T | T | T | G | T | G | G | G | T | C | T | A | C | A | T | T | C | T | C | - | -                  | -                    | -                 | 0.35% (225 reads) |                   |
| C         | C | A | T | T | G | C | A | G | G | A | A | T | C | - | - | - | - | - | - | - | - | T | G | G | G | G | T | C | T | A | C | A | T | T | C | T | C | A | T | -                  | 0.33% (213 reads)    |                   |                   |                   |
| C         | C | A | T | T | G | C | A | G | G | A | A | T | C | A | T | T | C | T | - | - | - | - | - | - | - | - | - | - | A | C | A | T | T | C | T | C | A | T | - | 0.31% (199 reads)  |                      |                   |                   |                   |
| C         | C | A | T | T | G | C | A | G | G | A | A | T | C | A | G | - | - | - | G | A | A | T | G | G | G | G | T | C | T | A | C | A | T | T | C | T | C | A | T | -                  | 0.28% (183 reads)    |                   |                   |                   |
| -         | - | - | - | - | - | - | - | - | - | - | - | - | - | - | - | - | - | - | - | - | - | G | T | G | G | G | G | T | C | T | A | C | A | T | T | C | T | C | A | T                  | -                    | 0.28% (181 reads) |                   |                   |
| C         | C | A | T | T | G | C | A | G | G | A | A | T | C | A | T | T | C | T | G | T | C | A | A | T | T | C | T | G | T | G | G | G | G | T | C | T | A | C | A | -                  | -                    | -                 | 0.27% (176 reads) |                   |
| C         | C | A | T | T | G | C | A | G | G | A | A | T | C | A | T | T | C | T | G | G | G | T | G | G | G | G | T | C | T | A | C | A | T | T | C | T | C | A | - | -                  | -                    | -                 | 0.27% (173 reads) |                   |
| C         | C | A | T | T | G | C | A | G | G | A | A | T | C | A | T | T | C | T | G | - | - | - | G | G | G | G | T | C | T | A | C | A | T | T | C | T | C | A | T | -                  | 0.27% (172 reads)    |                   |                   |                   |
| C         | C | A | T | T | G | C | A | G | G | A | A | T | C | A | T | T | C | T | G | - | - | - | - | - | - | - | - | - | - | - | - | - | - | - | - | - | - | - | - | -                  | -                    | 0.25% (160 reads) |                   |                   |
| C         | C | A | T | T | G | C | A | G | G | A | A | T | C | A | A | T | - | - | - | - | - | G | T | G | G | G | G | T | C | T | A | C | A | T | T | C | T | C | A | T                  | -                    | 0.24% (155 reads) |                   |                   |
| C         | C | A | T | T | G | C | A | G | G | A | A | T | C | A | T | T | C | T | G | - | G | T | G | G | G | G | T | C | T | A | C | A | T | T | C | T | C | A | T | -                  | 0.24% (154 reads)    |                   |                   |                   |
| T         | G | C | A | G | G | A | A | T | C | A | T | T | C | A | C | A | T | T | C | T | G | T | G | G | G | G | T | C | T | A | C | A | T | T | C | T | C | A | T | -                  | 0.22% (140 reads)    |                   |                   |                   |
| -         | - | - | - | - | - | - | - | - | - | - | - | - | - | - | - | - | - | - | - | - | - | - | - | - | - | - | - | - | - | - | - | - | - | - | - | - | - | - | - | -                  | -                    | 0.20% (130 reads) |                   |                   |
| -         | - | - | - | - | - | - | - | - | - | - | - | - | - | - | - | - | - | - | - | - | - | - | - | - | - | - | - | - | - | - | - | - | - | - | - | - | - | - | - | -                  | -                    | 0.20% (129 reads) |                   |                   |

**bold**
Substitutions

Insertions

-
Deletions

-----
Predicted cleavage position

C C A T T G C A G G A A T C A T T C T G T G T G G G G T C T A C A T T C T C A T - Reference  
*OIOca2 T2*

|   |   |   |   |   |   |   |   |   |   |   |   |   |   |   |   |   |   |   |   |   |   |   |   |   |   |   |   |   |   |   |   |   |   |   |   |   |   |          |   |   |                      |
|---|---|---|---|---|---|---|---|---|---|---|---|---|---|---|---|---|---|---|---|---|---|---|---|---|---|---|---|---|---|---|---|---|---|---|---|---|---|----------|---|---|----------------------|
| C | C | A | T | T | G | C | A | G | G | A | A | T | C | A | T | T | C | T | G | T | G | T | G | G | G | G | T | C | T | A | C | A | T | T | C | T | C | A        | T | - | 93.12% (62082 reads) |
| C | C | A | T | T | G | C | A | G | G | A | A | T | C | A | T | T | C | T | G | - | - | T | G | G | G | G | T | C | T | A | C | A | T | T | C | T | C | A        | T | - | 2.37% (1581 reads)   |
| C | C | A | T | T | G | C | A | G | G | A | A | T | C | A | T | T | - | - | - | - | G | T | G | G | G | G | T | C | T | A | C | A | T | T | C | T | C | A        | T | - | 0.56% (371 reads)    |
| C | C | A | T | T | G | C | A | G | G | A | A | T | C | A | T | T | C | T | G | T | G | T | G | G | G | G | T | C | T | A | C | A | T | T | C | T | C | <b>c</b> | T | - | 0.23% (153 reads)    |
| C | C | A | T | T | G | C | A | G | G | A | A | T | C | A | T | T | C | T | G | C | A | T | T | C | T | G | T | G | G | G | G | T | C | T | A | C | A | T        | T | - | 0.22% (147 reads)    |

**bold** Substitutions

 Insertions

- Deletions

----- Predicted cleavage position

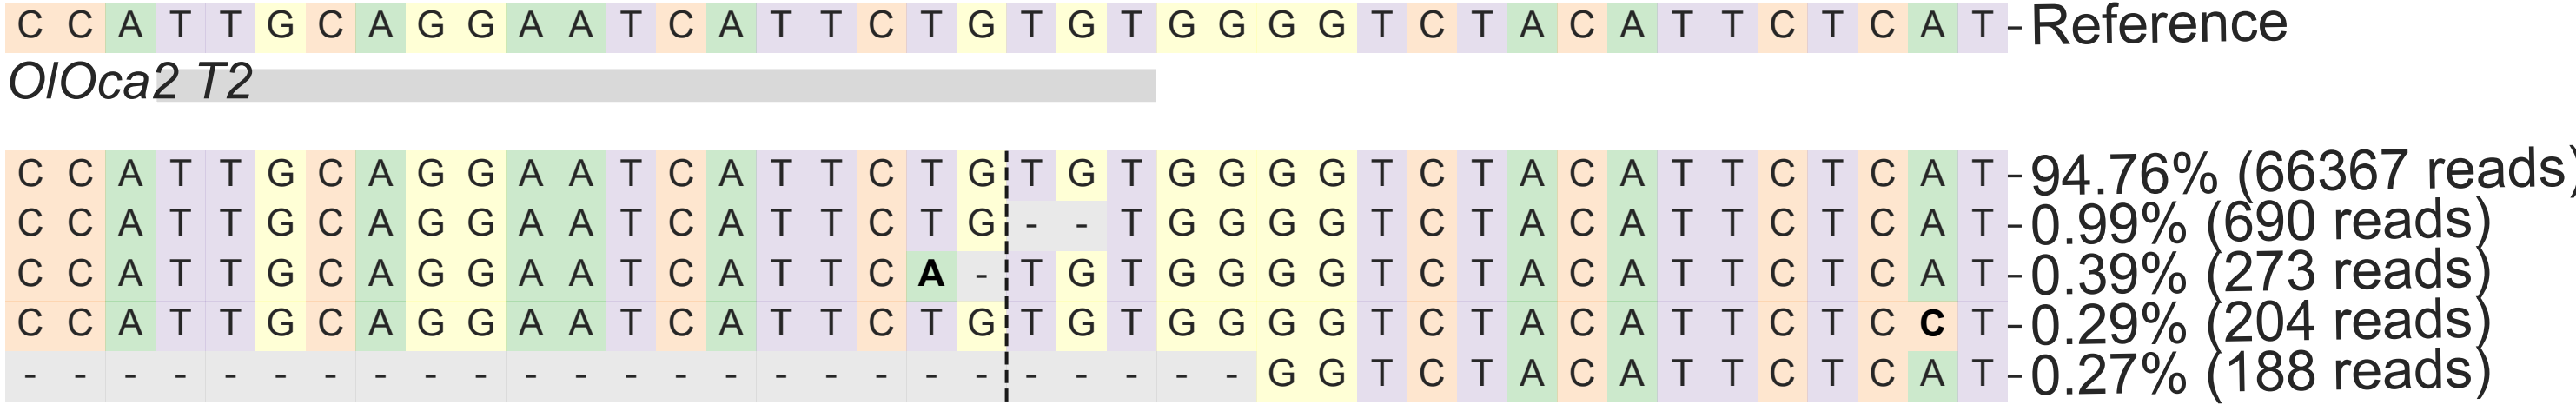

**bold** Substitutions

 Insertions

- Deletions

----- Predicted cleavage position

: CasJÁpool2 OIOca2

C C A T T G C A G G A A T C A T T C T G T G T G G G G T C T A C A T T C T C A T - Reference

*OIOca2 T2*

C C A T T G C A G G A A T C A T T C T G T G T G G G G T C T A C A T T C T C A T - 94.78% (55185 reads)  
C C A T T G C A G G A A T C A T T C T G - - T G G G G T C T A C A T T C T C A T - 1.63% (950 reads)

**bold**

-

-----

Substitutions

Insertions

Deletions

Predicted cleavage position

: Cas9 pool3 *OIOca2*

C C A T T G C A G G A A T C A T T C T G T G T G G G G T C T A C A T T C T C A T - Reference

*OIOca2 T2*

C C A T T G C A G G A A T C A T T C T G T G T G G G G T C T A C A T T C T C A T - 97.63% (47900 reads)

**bold**

Substitutions



Insertions

-

Deletions

-----

Predicted cleavage position

uninjected pool1 OIOca2

C C A T T G C A G G A A T C A T T C T G T G T G G G G T C T A C A T T C T C A T - Reference

*OIOca2 T2*

C C A T T G C A G G A A T C A T T C T G T G T G G G G T C T A C A T T C T C A T - 97.87% (46994 reads)

**bold**

Substitutions

Insertions

-

Deletions

-----

Predicted cleavage position

uninjected pool2 *OIOca2*

C C A T T G C A G G A A T C A T T C T G T G T G G G G T C T A C A T T C T C A T -Reference

*OIOca2 T2*

C C A T T G C A G G A A T C A T T C T G T G T G G G G T C T A C A T T C T C A T -97.71% (55169 reads)  
C C A T T G C A G G A A T C A T T C T G T G T G G G G T C T A C A T T C T C **c** T -0.21% (116 reads)

**bold**

-

-----

Substitutions

Insertions

Deletions

Predicted cleavage position

uninjected pool3 *OIOca2*

A A T G C A T T T G T C A A T G G A T A C C C T G G G G A T G G T G G A C G A T-Reference

$O(R \times 2)$

|                                                                                     |                      |
|-------------------------------------------------------------------------------------|----------------------|
| A A T G C A T T T G T C A A T G G - - - - - G G A T G G T G G A C G A T             | 14.85% (12469 reads) |
| A A T G C A T T T G T C A A T G G A T - - - - - G G T G G A C G A T                 | 13.73% (11530 reads) |
| A A T G C A T T T G T C A A T G G A T - - - - - G G G G A T G G T G G A C G A T     | 6.90% (5796 reads)   |
| A A T G C A T T T G T C A A T G G A T - C C C T G G G G A T G G T G G A C G A T     | 6.62% (5554 reads)   |
| A A T G C A T T T G T C A - - - - - T G G G G A T G G T G G A C G A T               | 4.73% (3970 reads)   |
| A A T G C A T T T G T C A A T G G A T A G T G G A T G G T G G A C                   | 3.45% (2897 reads)   |
| A A T G C A T T T G T C - - - - - C C T G G G G A T G G T G G A C G A T             | 3.41% (2860 reads)   |
| A A T G C A T T T G T C A A T G G A T A - - - T G G G G A T G G T G G A C G A T     | 3.17% (2659 reads)   |
| A A T G C A T T T G T C A A T G G - - - - - G A T G G T G G A C G A T               | 1.71% (1432 reads)   |
| A A T G C A T T T G T C A A T G G - - - - - G A T G G T G G A C G A T               | 1.62% (1363 reads)   |
| - - - - - - - - - - - G A T A C C C T G G G G A T G G T G G A C G A T               | 1.55% (1305 reads)   |
| G C A T T T G T C A A T G G G G A T G G T G G A C G A T                             | 1.39% (1163 reads)   |
| - - - - - - - - - - - C C C T G G G G A T G G T G G A C G A T                       | 1.34% (1121 reads)   |
| A A T G C A T T T G T C A A T G G A T A T C G T C C A C C A T C C C T G G G G A     | 1.31% (1096 reads)   |
| A A T G C A T T T G T C A A G G G A T A T T G G A A A C C C C T G                   | 1.19% (1000 reads)   |
| A A T G C A T - - - - - - - - - - - G G G G A T G G T G G A C G A T                 | 1.16% (978 reads)    |
| A A T G C A T T T G T C A A T G G A T G - - G T G G G G A T G G T G G A C G A C     | 1.06% (889 reads)    |
| A A T G C A T T T G T C A A T G G A T A T T T C C A C C C T G G G A T G G T G       | 1.04% (869 reads)    |
| A A T G C A T T T G T C A A T G G A G - - - - G T G G A T G G T G G A C G A T       | 1.02% (853 reads)    |
| - - - - - - - - - - - T G G T G A - - - T G G G G A T G G T G G A C G A T           | 0.99% (833 reads)    |
| A A T G C A T T T G T C A A T - - - - - C C C T G G G G A T G G T G G A C G A T     | 0.93% (777 reads)    |
| A A T G C A T T T G T C A A T T C T A A C C C T A A C C C T G G G G A T G G T G     | 0.92% (775 reads)    |
| A A T G C A T T T G T C A A T G G C A A C C C T G G G G A T G G T G G A C G A T     | 0.91% (760 reads)    |
| A A T G C A T T T G T C A A T G G A T A T C G T C C A C C A T C G T C C A C         | 0.87% (727 reads)    |
| A A T G C A T T T G T C A A T G C C C A - C C T G G G G A T G G T G G A C G A T     | 0.85% (711 reads)    |
| A A T - - - - - - - - - - - - - - - - - - - - - - - - - - - - - - - - - - -         | 0.83% (696 reads)    |
| A A T G C A T T T G T C A A T G G A - - - - - G G G A T G G T G G A C G A T         | 0.73% (611 reads)    |
| A A T G C A T T T G T C A A T G G A G C C A G C G C C T G G G G A T G G T G G A     | 0.70% (584 reads)    |
| A A T G C A - - - - - - - - - - - - - - - - - - - - - - - - - - - - -               | 0.67% (563 reads)    |
| A A T G C A T T T G T C A - - - - - - - - - - - C T G G G G A T G G T G G A C G A T | 0.66% (553 reads)    |
| A A T G C A T T T G T C A A T G G A T A - - - - - A T G G T G G A C G A T           | 0.65% (547 reads)    |
| A A T G C A T T T G T C A A T G G A T A C C A T A C C T G G G G A T G G T G G A     | 0.63% (533 reads)    |
| A A T G C A T T T G T C A A T G G A T A T T G A C A A A T G C A T G A T G G G G     | 0.63% (527 reads)    |
| A T G C A T T T G T C A T G T T G A T G C C A C A C C A T A T C G T C C A C C A     | 0.61% (509 reads)    |
| A A T G C A T T T G T C A A T G G - - - - - - - - - - - T G G A C G A T             | 0.57% (475 reads)    |
| A A T G C A T T T G T C A A T G G A T A T A T C C A T T G G G G A T G G T G G A     | 0.55% (458 reads)    |
| A A T G C A T T T G T C - - - - - - - - - - - T G G G G A T G G T G G A C G A T     | 0.52% (440 reads)    |
| G G A G G A T C G T C C A C C A T C C A C C C T G G G G A T G G T G G A C G A T     | 0.51% (426 reads)    |
| A A T G C A T T T G T C A A T G G A T G C C T G T C A G T T T C C C T G G G G A     | 0.50% (421 reads)    |
| A A T G C A T T T G T C A A T G G A T A C C C T G G G G A T G G T G G A C G A T     | 0.42% (356 reads)    |
| A A T G C A T T T G T C A A T G G A - - C C C T G G G G A T G G T G G A C G A T     | 0.42% (350 reads)    |
| A A T G C A T T T G T C A A T G G A C A C A T C C C C A T C C C T G G G G A T G     | 0.41% (347 reads)    |
| A T T T A T A T C G T C C A C - - - - - C A C T G G G G A T G G T G G A C G A T     | 0.34% (282 reads)    |
| A A T G C A T T T G T C A A T G G A G G - - A T G G G G A T G G T G G A C G A T     | 0.33% (280 reads)    |
| - - - - - - - - - - - A T G G - - - - - G A T G G T G G A C G A T                   | 0.31% (264 reads)    |
| A A T G C A T T T G T C A A T G G G G A - - T T G G G G A T G G T G G A C G A T     | 0.30% (249 reads)    |
| A A T G C A T T T G T C A A T G G A T G A C A T G G G G A T G G G G A T G G G G     | 0.29% (244 reads)    |
| A A T G C A T T T G T C A A T G G A T C G T C C A C C A T C C C C T G G G G A       | 0.28% (231 reads)    |
| A A T G C A T T T G T C A A T G G A T A - - - - - A A T G G T G G A C G A T         | 0.26% (217 reads)    |
| A A T G C A T T T G T C A A T G G - - - - - G G G T G G T G G A C G A T             | 0.26% (217 reads)    |

**bold** Substitutions  
 □ Insertions  
 - Deletions  
 ----- Predicted cleavage position

|                                                                                             |   |   |   |   |   |   |   |   |          |   |   |          |          |          |          |          |          |          |          |          |          |          |          |          |          |          |          |          |          |          |          |          |          |          |                      |          |          |                    |                    |                    |                    |                    |
|---------------------------------------------------------------------------------------------|---|---|---|---|---|---|---|---|----------|---|---|----------|----------|----------|----------|----------|----------|----------|----------|----------|----------|----------|----------|----------|----------|----------|----------|----------|----------|----------|----------|----------|----------|----------|----------------------|----------|----------|--------------------|--------------------|--------------------|--------------------|--------------------|
| A A T G C A T T T G T C A A T G G A T A C C C T G G G G A T G G T G G A C G A T - Reference |   |   |   |   |   |   |   |   |          |   |   |          |          |          |          |          |          |          |          |          |          |          |          |          |          |          |          |          |          |          |          |          |          |          |                      |          |          |                    |                    |                    |                    |                    |
| OIRx2                                                                                       |   |   |   |   |   |   |   |   |          |   |   |          |          |          |          |          |          |          |          |          |          |          |          |          |          |          |          |          |          |          |          |          |          |          |                      |          |          |                    |                    |                    |                    |                    |
| A                                                                                           | A | T | G | C | A | T | T | T | G        | T | C | A        | A        | T        | G        | G        | -        | -        | -        | -        | -        | -        | -        | -        | -        | -        | -        | -        | -        | -        | -        | -        | -        | -        | 19.56% (17263 reads) |          |          |                    |                    |                    |                    |                    |
| A                                                                                           | A | T | G | C | A | T | T | T | G        | T | C | A        | A        | T        | G        | G        | A        | T        | -        | -        | -        | -        | -        | -        | -        | -        | -        | -        | -        | -        | -        | -        | -        | -        | 10.83% (9562 reads)  |          |          |                    |                    |                    |                    |                    |
| A                                                                                           | A | T | G | C | A | T | T | T | G        | T | C | A        | A        | T        | G        | G        | -        | -        | -        | -        | -        | -        | -        | -        | -        | -        | G        | A        | T        | G        | G        | T        | G        | G        | A                    | C        | G        | A                  | T                  | 4.05% (3577 reads) |                    |                    |
| -                                                                                           | - | - | - | - | - | - | - | - | -        | - | - | -        | -        | -        | -        | -        | -        | -        | -        | -        | -        | -        | -        | -        | -        | -        | G        | G        | G        | A        | T        | G        | G        | T        | G                    | G        | A        | C                  | G                  | A                  | T                  | 3.64% (3215 reads) |
| A                                                                                           | A | T | G | C | A | T | T | T | G        | T | C | A        | A        | T        | G        | G        | A        | T        | -        | C        | C        | C        | T        | G        | G        | G        | G        | A        | T        | G        | G        | T        | G        | G        | A                    | C        | G        | A                  | T                  | 3.55% (3130 reads) |                    |                    |
| A                                                                                           | A | T | G | C | A | T | T | T | G        | T | C | A        | A        | T        | G        | G        | A        | T        | <b>G</b> | -        | -        | <b>G</b> | T        | G        | G        | G        | G        | A        | T        | G        | G        | T        | G        | G        | A                    | C        | G        | A                  | T                  | 2.81% (2483 reads) |                    |                    |
| A                                                                                           | A | T | G | C | A | T | T | T | G        | T | C | A        | A        | T        | G        | G        | A        | T        | -        | -        | -        | -        | -        | G        | G        | G        | G        | A        | T        | G        | G        | T        | G        | G        | A                    | C        | G        | A                  | T                  | 2.54% (2239 reads) |                    |                    |
| A                                                                                           | A | T | G | C | A | T | T | T | G        | T | C | -        | -        | -        | -        | -        | -        | -        | -        | C        | C        | T        | G        | G        | G        | G        | A        | T        | G        | G        | T        | G        | G        | A        | C                    | G        | A        | T                  | 2.50% (2207 reads) |                    |                    |                    |
| A                                                                                           | A | T | G | C | A | T | T | T | G        | T | C | A        | A        | T        | G        | G        | <b>T</b> | <b>C</b> | <b>A</b> | -        | -        | <b>A</b> | T        | <b>G</b> | <b>T</b> | <b>C</b> | <b>A</b> | A        | T        | G        | G        | T        | G        | G        | A                    | C        | G        | A                  | T                  | 2.12% (1869 reads) |                    |                    |
| A                                                                                           | A | T | G | C | A | T | T | T | G        | T | C | A        | A        | T        | G        | G        | A        | -        | -        | -        | C        | C        | T        | G        | G        | G        | G        | A        | T        | G        | G        | T        | G        | G        | A                    | C        | G        | A                  | T                  | 1.96% (1729 reads) |                    |                    |
| A                                                                                           | A | T | G | C | A | T | T | T | G        | T | C | A        | A        | T        | G        | G        | -        | -        | -        | -        | -        | -        | -        | -        | -        | -        | -        | -        | -        | -        | -        | T        | G        | G        | A                    | C        | G        | A                  | T                  | 1.91% (1685 reads) |                    |                    |
| A                                                                                           | A | T | G | C | A | T | T | T | G        | T | C | A        | A        | T        | G        | G        | A        | <b>C</b> | <b>A</b> | C        | C        | C        | T        | G        | G        | G        | G        | A        | T        | G        | G        | T        | G        | G        | A                    | C        | G        | A                  | T                  | 1.90% (1673 reads) |                    |                    |
| A                                                                                           | A | T | G | C | A | T | T | T | G        | T | C | A        | A        | T        | G        | G        | A        | T        | <b>A</b> | <b>A</b> | C        | C        | C        | T        | G        | G        | G        | G        | A        | T        | G        | G        | T        | G        | G                    | A        | C        | G                  | A                  | T                  | 1.77% (1563 reads) |                    |
| -                                                                                           | - | - | - | - | - | T | T | T | <b>C</b> | T | - | -        | -        | -        | -        | -        | -        | -        | -        | -        | -        | -        | -        | -        | -        | -        | -        | -        | -        | -        | -        | -        | -        | -        | -                    | -        | G        | A                  | T                  | 1.65% (1459 reads) |                    |                    |
| A                                                                                           | A | T | G | C | A | T | T | T | G        | - | - | -        | -        | -        | -        | -        | -        | -        | -        | -        | -        | -        | -        | -        | -        | G        | G        | G        | A        | T        | G        | G        | T        | G        | G                    | A        | C        | G                  | A                  | T                  | 1.62% (1429 reads) |                    |
| A                                                                                           | A | T | G | C | A | T | T | T | G        | T | C | A        | A        | T        | G        | <b>C</b> | <b>A</b> | <b>T</b> | <b>T</b> | <b>T</b> | <b>G</b> | <b>T</b> | <b>C</b> | <b>A</b> | <b>T</b> | <b>T</b> | <b>G</b> | <b>C</b> | <b>A</b> | <b>T</b> | <b>G</b> | <b>G</b> | <b>G</b> | <b>G</b> | <b>A</b>             | <b>T</b> | <b>G</b> | <b>G</b>           | <b>T</b>           | 1.53% (1347 reads) |                    |                    |
| T                                                                                           | T | G | T | C | A | A | T | G | G        | A | T | <b>G</b> | <b>G</b> | <b>T</b> | <b>G</b> | <b>G</b> | <b>G</b> | <b>G</b> | <b>A</b> | <b>T</b> | <b>G</b> | <b>G</b> | <b>G</b> | <b>G</b> | <b>G</b> | <b>A</b> | <b>T</b> | <b>G</b> | <b>G</b> | <b>T</b> | <b>G</b> | <b>G</b> | <b>A</b> | <b>C</b> | <b>G</b>             | <b>A</b> | <b>T</b> | 1.52% (1345 reads) |                    |                    |                    |                    |
| A                                                                                           | A | T | G | C | A | T | T | T | G        | T | C | A        | A        | T        | G        | G        | <b>G</b> | -        | -        | -        | -        | -        | -        | G        | G        | G        | G        | A        | T        | G        | G        | T        | G        | G        | A                    | C        | G        | A                  | T                  | 1.49% (1311 reads) |                    |                    |
| A                                                                                           | A | T | G | C | A | T | T | T | G        | T | C | A        | A        | T        | G        | G        | A        | T        | <b>A</b> | <b>T</b> | <b>C</b> | <b>C</b> | <b>C</b> | <b>T</b> | <b>G</b> | <b>G</b> | <b>G</b> | <b>G</b> | <b>A</b> | <b>T</b> | <b>G</b> | <b>G</b> | <b>T</b> | <b>G</b> | <b>G</b>             | <b>A</b> | <b>C</b> | <b>G</b>           | <b>A</b>           | 1.42% (1254 reads) |                    |                    |
| A                                                                                           | A | T | G | C | A | T | T | T | G        | T | C | A        | A        | T        | G        | -        | -        | -        | -        | -        | -        | C        | T        | G        | G        | G        | G        | A        | T        | G        | G        | T        | G        | G        | A                    | C        | G        | A                  | T                  | 1.42% (1249 reads) |                    |                    |
| A                                                                                           | A | T | G | C | A | T | T | T | G        | T | C | A        | A        | T        | G        | G        | A        | T        | <b>G</b> | <b>G</b> | <b>T</b> | <b>G</b> | <b>G</b> | <b>A</b> | <b>T</b> | <b>G</b> | <b>G</b> | <b>G</b> | <b>G</b> | <b>A</b> | <b>T</b> | <b>G</b> | <b>G</b> | <b>T</b> | <b>G</b>             | <b>G</b> | <b>A</b> | <b>C</b>           | <b>G</b>           | 1.28% (1132 reads) |                    |                    |
| A                                                                                           | A | T | G | C | A | T | T | T | G        | T | C | A        | A        | T        | G        | G        | A        | T        | <b>A</b> | <b>C</b> | <b>C</b> | <b>C</b> | <b>T</b> | <b>G</b> | <b>G</b> | <b>G</b> | <b>G</b> | <b>A</b> | <b>T</b> | <b>G</b> | <b>G</b> | <b>T</b> | <b>G</b> | <b>G</b> | <b>A</b>             | <b>C</b> | <b>G</b> | <b>A</b>           | T                  | 1.25% (1107 reads) |                    |                    |
| A                                                                                           | A | T | G | C | A | T | T | T | G        | T | C | A        | A        | T        | G        | G        | A        | T        | <b>A</b> | <b>A</b> | <b>A</b> | <b>G</b> | <b>T</b> | <b>G</b> | <b>T</b> | <b>A</b> | <b>A</b> | <b>A</b> | <b>G</b> | <b>C</b> | <b>C</b> | <b>T</b> | <b>G</b> | <b>G</b> | <b>G</b>             | <b>G</b> | <b>A</b> | <b>T</b>           | <b>G</b>           | 1.20% (1060 reads) |                    |                    |
| A                                                                                           | A | T | G | C | A | T | T | T | G        | T | C | A        | A        | T        | G        | G        | A        | -        | -        | C        | C        | C        | T        | G        | G        | G        | G        | A        | T        | G        | G        | T        | G        | G        | A                    | C        | G        | A                  | T                  | 1.02% (896 reads)  |                    |                    |
| A                                                                                           | A | T | G | C | A | T | T | T | G        | T | C | A        | A        | T        | G        | G        | A        | T        | <b>A</b> | <b>T</b> | <b>G</b> | <b>G</b> | <b>T</b> | <b>T</b> | <b>A</b> | <b>T</b> | <b>C</b> | <b>C</b> | <b>A</b> | <b>T</b> | <b>C</b> | <b>C</b> | <b>C</b> | <b>T</b> | <b>G</b>             | <b>G</b> | <b>G</b> | <b>G</b>           | <b>A</b>           | 0.91% (807 reads)  |                    |                    |
| A                                                                                           | A | T | G | C | A | T | T | T | G        | T | C | A        | A        | T        | G        | G        | A        | T        | <b>A</b> | <b>T</b> | <b>G</b> | <b>G</b> | <b>T</b> | <b>G</b> | <b>G</b> | <b>G</b> | <b>G</b> | <b>A</b> | <b>T</b> | <b>G</b> | <b>G</b> | <b>T</b> | <b>G</b> | <b>G</b> | <b>A</b>             | <b>C</b> | <b>G</b> | <b>A</b>           | T                  | 0.83% (730 reads)  |                    |                    |
| A                                                                                           | A | T | G | C | A | T | T | T | G        | T | C | A        | A        | T        | G        | G        | A        | T        | <b>A</b> | <b>A</b> | <b>T</b> | <b>G</b> | <b>A</b> | <b>C</b> | <b>A</b> | <b>A</b> | <b>T</b> | <b>G</b> | <b>G</b> | <b>G</b> | <b>G</b> | <b>A</b> | <b>T</b> | <b>G</b> | <b>G</b>             | <b>T</b> | <b>G</b> | <b>G</b>           | <b>A</b>           | 0.81% (715 reads)  |                    |                    |
| A                                                                                           | A | T | G | C | A | T | T | T | G        | - | - | -        | -        | -        | G        | G        | A        | T        | -        | -        | -        | -        | T        | G        | G        | G        | G        | A        | T        | G        | G        | T        | G        | G        | A                    | C        | G        | A                  | T                  | 0.77% (679 reads)  |                    |                    |
| A                                                                                           | A | T | G | C | A | T | T | T | G        | T | C | A        | A        | T        | G        | G        | -        | -        | -        | -        | -        | -        | -        | -        | G        | G        | G        | A        | T        | G        | G        | T        | G        | G        | A                    | C        | G        | A                  | T                  | 0.74% (650 reads)  |                    |                    |
| A                                                                                           | A | T | G | C | A | T | T | T | G        | T | C | A        | A        | T        | G        | G        | A        | T        | <b>G</b> | -        | -        | <b>G</b> | T        | G        | G        | <b>A</b> | <b>C</b> | <b>G</b> | <b>A</b> | <b>T</b> |          |          |          |          |                      |          |          |                    |                    |                    |                    |                    |

|                                                                                                                                                                                                                                                                                                                                                                                                                                                                                                                                                                                                                                                                                                                                                                                                                                                                                                                                                                                                                                                                                                                                                                                                                                                                                                                                                                                                                                                                                                                                                                                                                                                                                                                                                                                                                                                                                                                                                                                                                                                                                                                                                                                                                                                                                                                                                                                                                                                                                                                                                                                                                                                                                                                                                                                                                                                                                                                                                                                                                                                                                                                                                                                                                                                                                                                                                                                                                                                                                                                                                                                                                                                                                                                                                                                                                                                                                                                                                                                                                                                                                                                                                                                                                                                                                                                                                                                                                                                                                                                                                                                                                                                                                                                                                                                                                                                                                                                                                                                                                                                                                                                                                                                                                                                                                                                                                                                                                                                                                                                                                                                                                                                                                                                                                                                                                                                                                                                                                                                                                                                                                                                                                                                                                                                                                                                                                                                                                                                                                                                                                                                                                                                                                                                                                                                                                                                                                                                                                                                                                                                                                                                                                                                                                                                                                                                                                                                                                                                                                                                                                                                                                                                                                                                                                                                                                                                                                                                                                                                                                                                                                                                                                                                                                                                                                                                                                                                                                                                                                                                                                                                                                                                                                                                                                                                                                                                                                                                                                                                                                                                                                                                                                                                                                                                                                                                                                                                                                                                                                                                                                                                                                                                                                                                                                                                                                                                                                                                                                                                                                                                                                                                                                                                                                                                                                                                                                                                                                                                                                                                                                                                                                                                                                                                                                                                                                                                                                                                                                                                                                                                                                                                                                                                                                                                                                                                                                                                                                                                                                                                                                                                                                                                                                                                                                                                                                                                                                                                                                                                                                                                                                                                                                                                                                                                                                                                                                                                                                                                                                                                                                                                                                                                                                                                                                                                                                                                                                                                                                                                                                                                                                                                                                                                                                                                                                                                                                                                                                                                                                                                                                                                                                                                                                                                                                                                                                                                                                                                                                                                                                                                                                                                                                                                                                                                                                                                                                                                                                                                                                                 |  |  |  |  |  |  |  |  |  |  |  |  |  |  |  |  |  |  |  |  |  |  |  |  |  |  |  |  |  |
|-------------------------------------------------------------------------------------------------------------------------------------------------------------------------------------------------------------------------------------------------------------------------------------------------------------------------------------------------------------------------------------------------------------------------------------------------------------------------------------------------------------------------------------------------------------------------------------------------------------------------------------------------------------------------------------------------------------------------------------------------------------------------------------------------------------------------------------------------------------------------------------------------------------------------------------------------------------------------------------------------------------------------------------------------------------------------------------------------------------------------------------------------------------------------------------------------------------------------------------------------------------------------------------------------------------------------------------------------------------------------------------------------------------------------------------------------------------------------------------------------------------------------------------------------------------------------------------------------------------------------------------------------------------------------------------------------------------------------------------------------------------------------------------------------------------------------------------------------------------------------------------------------------------------------------------------------------------------------------------------------------------------------------------------------------------------------------------------------------------------------------------------------------------------------------------------------------------------------------------------------------------------------------------------------------------------------------------------------------------------------------------------------------------------------------------------------------------------------------------------------------------------------------------------------------------------------------------------------------------------------------------------------------------------------------------------------------------------------------------------------------------------------------------------------------------------------------------------------------------------------------------------------------------------------------------------------------------------------------------------------------------------------------------------------------------------------------------------------------------------------------------------------------------------------------------------------------------------------------------------------------------------------------------------------------------------------------------------------------------------------------------------------------------------------------------------------------------------------------------------------------------------------------------------------------------------------------------------------------------------------------------------------------------------------------------------------------------------------------------------------------------------------------------------------------------------------------------------------------------------------------------------------------------------------------------------------------------------------------------------------------------------------------------------------------------------------------------------------------------------------------------------------------------------------------------------------------------------------------------------------------------------------------------------------------------------------------------------------------------------------------------------------------------------------------------------------------------------------------------------------------------------------------------------------------------------------------------------------------------------------------------------------------------------------------------------------------------------------------------------------------------------------------------------------------------------------------------------------------------------------------------------------------------------------------------------------------------------------------------------------------------------------------------------------------------------------------------------------------------------------------------------------------------------------------------------------------------------------------------------------------------------------------------------------------------------------------------------------------------------------------------------------------------------------------------------------------------------------------------------------------------------------------------------------------------------------------------------------------------------------------------------------------------------------------------------------------------------------------------------------------------------------------------------------------------------------------------------------------------------------------------------------------------------------------------------------------------------------------------------------------------------------------------------------------------------------------------------------------------------------------------------------------------------------------------------------------------------------------------------------------------------------------------------------------------------------------------------------------------------------------------------------------------------------------------------------------------------------------------------------------------------------------------------------------------------------------------------------------------------------------------------------------------------------------------------------------------------------------------------------------------------------------------------------------------------------------------------------------------------------------------------------------------------------------------------------------------------------------------------------------------------------------------------------------------------------------------------------------------------------------------------------------------------------------------------------------------------------------------------------------------------------------------------------------------------------------------------------------------------------------------------------------------------------------------------------------------------------------------------------------------------------------------------------------------------------------------------------------------------------------------------------------------------------------------------------------------------------------------------------------------------------------------------------------------------------------------------------------------------------------------------------------------------------------------------------------------------------------------------------------------------------------------------------------------------------------------------------------------------------------------------------------------------------------------------------------------------------------------------------------------------------------------------------------------------------------------------------------------------------------------------------------------------------------------------------------------------------------------------------------------------------------------------------------------------------------------------------------------------------------------------------------------------------------------------------------------------------------------------------------------------------------------------------------------------------------------------------------------------------------------------------------------------------------------------------------------------------------------------------------------------------------------------------------------------------------------------------------------------------------------------------------------------------------------------------------------------------------------------------------------------------------------------------------------------------------------------------------------------------------------------------------------------------------------------------------------------------------------------------------------------------------------------------------------------------------------------------------------------------------------------------------------------------------------------------------------------------------------------------------------------------------------------------------------------------------------------------------------------------------------------------------------------------------------------------------------------------------------------------------------------------------------------------------------------------------------------------------------------------------------------------------------------------------------------------------------------------------------------------------------------------------------------------------------------------------------------------------------------------------------------------------------------------------------------------------------------------------------------------------------------------------------------------------------------------------------------------------------------------------------------------------------------------------------------------------------------------------------------------------------------------------------------------------------------------------------------------------------------------------------------------------------------------------------------------------------------------------------------------------------------------------------------------------------------------------------------------------------------------------------------------------------------------------------------------------------------------------------------------------------------------------------------------------------------------------------------------------------------------------------------------------------------------------------------------------------------------------------------------------------------------------------------------------------------------------------------------------------------------------------------------------------------------------------------------------------------------------------------------------------------------------------------------------------------------------------------------------------------------------------------------------------------------------------------------------------------------------------------------------------------------------------------------------------------------------------------------------------------------------------------------------------------------------------------------------------------------------------------------------------------------------------------------------------------------------------------------------------------------------------------------------------------------------------------------------------------------------------------------------------------------------------------------------------------------------------------------------------------------------------------------------------------------------------------------------------------------------------------------------------------------------------------------------------------------------------------------------------------------------------------------------------------------------------------------------------------------------------------------------------------------------------------------------------------------------------------------------------------------------------------------------------------------------------------------------------------------------------------------------------------------------------------------------------------------------------------------------------------------------------------------------------------------------------------------------------------------------------------------------------------------------------------------------------------------------------------------------------------------------------------------------------------------------------------------------------------------------------------------------------------------------------------------------------------------------------------------------------------------------------------------------------------------------------------------------------------------------------------------------------------------------------------------------------------------------------------------------------------------------------------------------------------------------------------------------------------------------------------------------------------------------------------------------------------------------------------------------------------------------------------------------------------------------------------------------------------------------------------------|--|--|--|--|--|--|--|--|--|--|--|--|--|--|--|--|--|--|--|--|--|--|--|--|--|--|--|--|--|
| A A T G C A T T T G T C A A T G G A T A C C C T G G G G A T G G T G G A C G A T - Reference                                                                                                                                                                                                                                                                                                                                                                                                                                                                                                                                                                                                                                                                                                                                                                                                                                                                                                                                                                                                                                                                                                                                                                                                                                                                                                                                                                                                                                                                                                                                                                                                                                                                                                                                                                                                                                                                                                                                                                                                                                                                                                                                                                                                                                                                                                                                                                                                                                                                                                                                                                                                                                                                                                                                                                                                                                                                                                                                                                                                                                                                                                                                                                                                                                                                                                                                                                                                                                                                                                                                                                                                                                                                                                                                                                                                                                                                                                                                                                                                                                                                                                                                                                                                                                                                                                                                                                                                                                                                                                                                                                                                                                                                                                                                                                                                                                                                                                                                                                                                                                                                                                                                                                                                                                                                                                                                                                                                                                                                                                                                                                                                                                                                                                                                                                                                                                                                                                                                                                                                                                                                                                                                                                                                                                                                                                                                                                                                                                                                                                                                                                                                                                                                                                                                                                                                                                                                                                                                                                                                                                                                                                                                                                                                                                                                                                                                                                                                                                                                                                                                                                                                                                                                                                                                                                                                                                                                                                                                                                                                                                                                                                                                                                                                                                                                                                                                                                                                                                                                                                                                                                                                                                                                                                                                                                                                                                                                                                                                                                                                                                                                                                                                                                                                                                                                                                                                                                                                                                                                                                                                                                                                                                                                                                                                                                                                                                                                                                                                                                                                                                                                                                                                                                                                                                                                                                                                                                                                                                                                                                                                                                                                                                                                                                                                                                                                                                                                                                                                                                                                                                                                                                                                                                                                                                                                                                                                                                                                                                                                                                                                                                                                                                                                                                                                                                                                                                                                                                                                                                                                                                                                                                                                                                                                                                                                                                                                                                                                                                                                                                                                                                                                                                                                                                                                                                                                                                                                                                                                                                                                                                                                                                                                                                                                                                                                                                                                                                                                                                                                                                                                                                                                                                                                                                                                                                                                                                                                                                                                                                                                                                                                                                                                                                                                                                                                                                                                                                                                     |  |  |  |  |  |  |  |  |  |  |  |  |  |  |  |  |  |  |  |  |  |  |  |  |  |  |  |  |  |
| OIRx2                                                                                                                                                                                                                                                                                                                                                                                                                                                                                                                                                                                                                                                                                                                                                                                                                                                                                                                                                                                                                                                                                                                                                                                                                                                                                                                                                                                                                                                                                                                                                                                                                                                                                                                                                                                                                                                                                                                                                                                                                                                                                                                                                                                                                                                                                                                                                                                                                                                                                                                                                                                                                                                                                                                                                                                                                                                                                                                                                                                                                                                                                                                                                                                                                                                                                                                                                                                                                                                                                                                                                                                                                                                                                                                                                                                                                                                                                                                                                                                                                                                                                                                                                                                                                                                                                                                                                                                                                                                                                                                                                                                                                                                                                                                                                                                                                                                                                                                                                                                                                                                                                                                                                                                                                                                                                                                                                                                                                                                                                                                                                                                                                                                                                                                                                                                                                                                                                                                                                                                                                                                                                                                                                                                                                                                                                                                                                                                                                                                                                                                                                                                                                                                                                                                                                                                                                                                                                                                                                                                                                                                                                                                                                                                                                                                                                                                                                                                                                                                                                                                                                                                                                                                                                                                                                                                                                                                                                                                                                                                                                                                                                                                                                                                                                                                                                                                                                                                                                                                                                                                                                                                                                                                                                                                                                                                                                                                                                                                                                                                                                                                                                                                                                                                                                                                                                                                                                                                                                                                                                                                                                                                                                                                                                                                                                                                                                                                                                                                                                                                                                                                                                                                                                                                                                                                                                                                                                                                                                                                                                                                                                                                                                                                                                                                                                                                                                                                                                                                                                                                                                                                                                                                                                                                                                                                                                                                                                                                                                                                                                                                                                                                                                                                                                                                                                                                                                                                                                                                                                                                                                                                                                                                                                                                                                                                                                                                                                                                                                                                                                                                                                                                                                                                                                                                                                                                                                                                                                                                                                                                                                                                                                                                                                                                                                                                                                                                                                                                                                                                                                                                                                                                                                                                                                                                                                                                                                                                                                                                                                                                                                                                                                                                                                                                                                                                                                                                                                                                                                                                                                           |  |  |  |  |  |  |  |  |  |  |  |  |  |  |  |  |  |  |  |  |  |  |  |  |  |  |  |  |  |
| A A T G C A T T T G T C A A T G G - - - - - - - - - - - - - - - - - - - - - - - - - - - - - - - - - - - - - - - - - - - - - - - - - - - - - - - - - - - - - - - - - - - - - - - - - - - - - - - - - - - - - - - - - - - - - - - - - - - - - - - - - - - - - - - - - - - - - - - - - - - - - - - - - - - - - - - - - - - - - - - - - - - - - - - - - - - - - - - - - - - - - - - - - - - - - - - - - - - - - - - - - - - - - - - - - - - - - - - - - - - - - - - - - - - - - - - - - - - - - - - - - - - - - - - - - - - - - - - - - - - - - - - - - - - - - - - - - - - - - - - - - - - - - - - - - - - - - - - - - - - - - - - - - - - - - - - - - - - - - - - - - - - - - - - - - - - - - - - - - - - - - - - - - - - - - - - - - - - - - - - - - - - - - - - - - - - - - - - - - - - - - - - - - - - - - - - - - - - - - - - - - - - - - - - - - - - - - - - - - - - - - - - - - - - - - - - - - - - - - - - - - - - - - - - - - - - - - - - - - - - - - - - - - - - - - - - - - - - - - - - - - - - - - - - - - - - - - - - - - - - - - - - - - - - - - - - - - - - - - - - - - - - - - - - - - - - - - - - - - - - - - - - - - - - - - - - - - - - - - - - - - - - - - - - - - - - - - - - - - - - - - - - - - - - - - - - - - - - - - - - - - - - - - - - - - - - - - - - - - - - - - - - - - - - - - - - - - - - - - - - - - - - - - - - - - - - - - - - - - - - - - - - - - - - - - - - - - - - - - - - - - - - - - - - - - - - - - - - - - - - - - - - - - - - - - - - - - - - - - - - - - - - - - - - - - - - - - - - - - - - - - - - - - - - - - - - - - - - - - - - - - - - - - - - - - - - - - - - - - - - - - - - - - - - - - - - - - - - - - - - - - - - - - - - - - - - - - - - - - - - - - - - - - - - - - - - - - - - - - - - - - - - - - - - - - - - - - - - - - - - - - - - - - - - - - - - - - - - - - - - - - - - - - - - - - - - - - - - - - - - - - - - - - - - - - - - - - - - - - - - - - - - - - - - - - - - - - - - - - - - - - - - - - - - - - - - - - - - - - - - - - - - - - - - - - - - - - - - - - - - - - - - - - - - - - - - - - - - - - - - - - - - - - - - - - - - - - - - - - - - - - - - - - - - - - - - - - - - - - - - - - - - - - - - - - - - - - - - - - - - - - - - - - - - - - - - - - - - - - - - - - - - - - - - - - - - - - - - - - - - - - - - - - - - - - - - - - - - - - - - - - - - - - - - - - - - - - - - - - - - - - - - - - - - - - - - - - - - - - - - - - - - - - - - - - - - - - - - - - - - - - - - - - - - - - - - - - - - - - - - - - - - - - - - - - - - - - - - - - - - - - - - - - - - - - - - - - - - - - - - - - - - - - - - - - - - - - - - - - - - - - - - - - - - - - - - - - - - - - - - - - - - - - - - - - - - - - - - - - - - - - - - - - - - - - - - - - - - - - - - - - - - - - - - - - - - - - - - - - - - - - - - - - - - - - - - - - - - - - - - - - - - - - - - - - - - - - - - - - - - - - - - - - - - - - - - - - - - - - - - - - - - - - - - - - - - - - - - - - - - - - - - - - - - - - - - - - - - - - - - - - - - - - - - - - - - - - - - - - - - - - - - - - - - - - - - - - - - - - - - - - - - - - - - - - - - - - - - - - - - - - - - - - - - - - - - - - - - - - - - - - - - - - - - - - - - - - - - - - - - - - - - - - - - - - - - - - - - - - - - - - - - - - - - - - - - - - - - - - - - - - - - - - - - - - - - - - - - - - - - - - - - - - - - - - - - - - - - - - - - - - - - - - - - - - - - - - - - - - - - - - - - - - - - - - - - - - - - - - - - - - - - - - - - - - - - - - - - - - - - - - - - - - - - - - - - - - - - - - - - - - - - - - - - - - - - - - - - - - - - - - - - - - - - - - - - - - - - - - - - - - - - - - - - - - - - - - - - - - - - - - - - - - - - - - - - - - - - - - - - - - - - - - - - - - - - - - - - - - - - - - - - - - - - - - - - - - - - - - - - - - - - - - - - - - - - - - - - - - - - - - - - - - - - - - - - - - - - - - - - - - - - - - - - - - - - - - - - - - - - - - - - - - - - - - - - - - - - - - - - - - - - - - - - - - - - - - - - - - - - - - - - - - - - - - - - - - - - - - - - - - - - - - - - - - - - - - - - - - - - - - - - - - - - - - - - - - - - - - - - - - - - - - - - - - - - - - - - - - - - - - - - - - - - - - - - - - - - - - - - - - - - - - - - - - - - - - - - - - - - - - - - - - - - - - - - - - - - - - - - - - - - - - - - - - - - - - - - - - - - - - - - - - - - - - - - - - - - - - - - - - - - - - - - - - - - - - - - - - - - - - - - - - - - - - - - - - - - - - - - - - - - - - - - - - - - - - - - - - - - - - - - - - - - - - - - - - - - - - - - - - - - - - - - - - - - - - - - - - - - - - - - - - - - - - - - - - - - - - - - - - - - - - - - - - - - - - - - - - - - - - - - - - - - - - - - - - - - - - - - - - - - - - - - - - - - - - - - - - - - - - - - - - - - - - - - - - - - - - - - - - - - - - - - - - - - - - - - - - - - - - - - - - - - - - - - - - - - - - - - - - - - - - - - - - - - - - - - - - - - - - - - - - - - - - - - - - - - - - - - - - - - - - - - - - - - - - - - - - - - - - - - - - - - - - - - - - - - - - - - - - - - - - - - - - - - - - - - - - - - - - - - - - - - - - - - - - - - - - - - - - - - - - - - - - - - - - - - - - - - - - - - - - - - - - - - - - - - - - - - - - - - - - - - - - - - - - - - - - - - - - - - - - - - - - - - - - - - - - - - - - - - - - - - - - - - - - - - - - - - - - - - - - - - - - - - - - - - - - - - - - - - - - - - - - - - - - - - - - - - - - - - - - - - - - - - - - - - - - - - - - - - - - - - - - - - - - - - - - - - - - - - - - - - - - - - - - - - - - - - - - - - - - - - - - - - - - - - - - - - - - - - - - - - - - - - - - - - - - - - - - - - - - - - - - - - - - - - - - - - - - - - - - - - - - - - - - - - - - - - - - - - - - - - - - - - - - - - - - - - - - - - - - - - - - - - - - - - - - - - - - - - - - - - - - - - - - - - - - - - - - - - - - - - - - - - - - - - - - - - - - - - - - - - - - - - - - - - - - - - - - - - - - - - - - - - - - - - - - - - - - - - - - - - - - - - - - - - - - - - - - - - - - - - - - - - - - - - - - - - - - - - - - - - - - - - - - - - - - - - - - - - - - - - - - - - - - - - - - - - - - - - - - - - - - - - - - - - - - - - - - - - - - - - - - - - - - - - - - - - - - - - - - - - - - - - - - - - - - - - - - - - - - - - - - - - - - - - - - - - - - - - - - - - - - - - - - - - - - - - - - - - - - - - - - - - - - - - - - - - - - - - - - - - - - - - - - - - - - - - - - - - - - - - - - - - - - - - - - - - - - - - - - - - - - - - - - - - - - - - - - - - - - - - - - - - - - - - - - - - - - - - - - - - - - - - - - - - - - - - - - - - - - - - - - - - - - - - - - - - - - - - - - - - - - - - - - - - - - - - - - - - - - - - - - - - - - - - - - - - - - - - - - - - - - - - - - - - - - - - - - - - - - - - - - - - - - - - - - - - - - - - - - - - - - - - - - - - - - - - - - - - - - - - - - - - - - - - - - - - - - - - - - - - - - - - - - - - - - - - - - - - - - - - - - - - - - - - - - - - - - - - - - - - - - - - - - - - - - - - - - - - - - - - - - - - - - - - - - - - - - - - - - - - - - - - - - - - - - - - - - - - - - - - - - - - - - - - - - - - - - - - - - - - - - - - - - - - - - - - - - - - - - - - - - - - - - - - - - - - - - - - - - - - - - - - - - - - - - - - - - - - - - - - - - - - - - - - - - - - - - - - - - - - - - - - - - - - - - - - - - - - - - - - - - - - - - - - - - - - - - - - - - - - - - - - - - - - - - - - - - - - - - - - - - - - - - - - - - - - - - - - - - - - - - - - - - - - - - - - - - - - - - - - - - - - - - - - - - - - - - - - - - - - - - - - - - - - - - - - - - - - - - - - - - - - - - - - - - - - - - - - - - - - - - - - - - - - - - - - - - - - - - - - - - - - - - - - - - - - - - - - - - - - - - - - - - - - - - - - - - - - - - - - - - - - - - - - - - - - - - - - - - - - - - - - - - - - - - - - - - - - - - - - - - - - - - - - - - - - - - - - - - - - - - - - - - - - - - - - - - - - - - - - - - - - - - - - - - - - - - - - - - - - - - - - - - - - - - - - - - - - - - - - - - - - - - - - - - - - - - - - - - - - - - - - - - - - - - - - - - - - - - - - - - - - - - - - - - - - - - - - - - - - - - - - - - - - - - - - - - - - - - - - - - - - - - - - - - - - - - - - - - - - - - - - - - - - - - - - - - - - - - - - - - - - - - - - - - - - - - - - - - - - - - - - - - - - - - - - - - - - - - - - - - - - - - - - - - - - - - - - - - - - - - - - - - - - - - - - - - - - - - - - - - - - - - - - - - - - - - - - - - - - - - - - - - - - - - - - - - - - - - - - - - - - - - - - - - - - - - - - - - - - - - - - - - - - - - - - - - - - - - - - - - - - - - - - - - - - - - - - - - - - - - - - - - - - - - - - - - - - - - - - - - - - - - - - - - - - - - - - - - - - - - - - - - - - - - - - - - - - - - - - - - - - - - - - - - - - - - - - - - - - - - - - - - - - - - - - - - - - - - - - - - - - - - - - - - - - - - - - - - - - - - - - - - - - - - - - - - - - - - - - - - - - - - - - - - - - - - - - - - - - - - - - - - - - - - - - - - - - - - - - - - - - - - - - - - - - - - - - - - - - - - - - - - - - - - - - - - - - - - - - - - - - - - - - - - - - - - - - - - - - - - - - - - - - - - - - - - - - - - - - - - - - - - - - - - - - - - - - - - - - - - - - - - - - - - - - - - - - - - - - - - - - - - - - - - - - - - - - - - - - - - - - - - - - - - - - - - - - - - - - - - - - - - - - - - - - - - - - - - - - - - - - - - - - - - - - - - - - - - - - - - - - - - - - - - - - - - - - - - - - - - - - - - - - - - - - - - - - - - - - - - - - - - - - - - - - - - - - - - - - - - - - - - - - - - - - - - - - - - - - - - - - - - - - - - - - - - - - - - - - - - - - - - - - - - - - - - - - - - - - - - - - - - - - - - - - - - - - - - - - - - - - - - - - - - - - - - - - - - - - - - - - - - - - - - - - - - - - - - - - - - - - - - - - - - - - - - - - - - - - - - - - - - - - - - - - - - - - - - - - - - - - - - - - - - - - - - - - - - - - - - - - - - - - - - - - - - - - - - - - - - - - - - - - - - - - - - - - - - - - - - - - - - - - - - - - - - - - - - - - - - - - - - - - - - - - - - - - - - - - - - - - - - - - - - - - - - - - - - - - - - - - - - - - - - - - - - - - - - - - - - - - - - - - - - - - - - - - - - - - - - - - - - - - - - - - - - - - - - - - - - - - - - - - - - - - - - - - - - - - - - - - - - - - - - - - - - - - - - - - - - - - - - - - - - - - - - - - - - - - - - - - - - - - - - - - - - - - - - - - - - - - - - - - - - - - - - - - - - - - - - - - - - - - - - - - - - - - - - - - - - - - - - - - - - - - - - - - - - - - - - - - - - - - - - - - - - - - - - - - - - - - - - - - - - - - - - - - - - - - - - - - - - - - - - - - - - - - - - - - - - - - - - - - - - - - - - - - - - - - - - - - - - - - - - - - - - - - - - - - - - - - - - - - - - - - - - - - - - - - - - - - - - - - - - - - - - - - - - - - - - - - - - - - - - - - - - - - - - - - - - - - - - - - - - - - - - - - - - - - - - - - - - - - - - - - - - - - - - - - - - - - - - - - - - - - - - - - - - - - - - - - - - - - - - - - - - - - - - - - - - - - - - - - - - - - - - - - - - - - - - - - - - - - - - - - - - - - - - - - - - - - - - - - - - - - - - - - - - - - - - - - - - - - - - - - - - - - - - - - - - - - - - - - - - - - - - - - - - - - - - - - - - - - - - - - - - - - - - - - - - - - - - - - - - - - - - - - - - - - - - - - - - - - - - - - - - - - - - - - - - - - - - - - - - - - - - - - - - - - - - - - - - - - - - - - - - - - - - - - - - - - - - - - - - - - - - - - - - - - - - - - - - - - - - - - - - - - - - - - - - - - - - - - - - - - - - - - - - - - - - - - - - - - - - - - - - - - - - - - - - - - - - - - - - - - - - - - - - - - - - - - - - - - - - - - - - - - - - - - - - - - - - - - - - - - - - - - - - - - - - - - - - - - - - - - - - - - - - - - - - - - - - - - - - - - - - - - - - - - - - - - - - - - - - - - - - - - - - - - - - - - - - - - - - - - - - - - - - - - - - - - - - - - - - - - - - - - - - - - - - - - - - - - - - - - - - - - - - - - - - - - - - - - - - - - - - - - - - - - - - - - - - - - - - - - - - - - - - - - - - - - - - - - - - - - - - - - - - - - - - - - - - - - - - - - - - - - - - - - - - - - - - - - - - - - - - - - - - - - - - - - - - - - - - - - - - - - - - - - - - - - - - - - - - - - - - - - - - - - - - - - - - - - - - - - - - - - - - - - - - - - - - - - - - - - - - - - - - - - - - - - - - - - - - - - - - - - - - - - - - - - - - - - - - - - - - - - - - - - - - - - - - - - - - - - - - - - - - - - - - - - - - - - - - - - - - - - - - - - - - - - - - - - - - - - - - - - - - - - - - - - - - - - - - - - - - - - - - - - - - - - - - - - - - - - - - - - - - - - - - - - - - - - - - - - - - - - - - - - - - - - - - - - - - - - - - - - - - - - - - - - - - - - - - - - - - - - - - - - - - - - - - - - - - - - - - - - - - - - - - - - - - - - - - - - - - - - - - - - - - - - - - - - - - - - - - - - - - - - - - - - - - - - - - - - - - - - - - - - - - - - - - - - - - - - - - - - - - - - - - - - - - - - - - - - - - - - - - - - - - - - - - - - - - - - - - - - - - - - - - - - - - - - - - - - - - - - - - - - - - - - - - - - - - - - - - - - - - - - - - - - - - - - - - - - - - - - - - - - - - - - - - - - - - - - - - - - - - - - - - - - - - - - - - - - - - - - - - - - - - - - - - - - - - - - - - - - - - - - - - - - - - - - - - - - - - - - - - - - - - - - - - - - - - - - - - - - - - - - - - - - - - - - - - - - - - - - - - - - - - - - - - - - - - - - - - - - - - - - - - - - - - - - - - - - - - - - - - - - - - - - - - - - - - - - - - - - - - - - - - - - - - - - - - - - - - - - - - - - - - - - - - - - - - - - - - - - - - - - - - - - - - - - - - - - - - - - - - - - - - - - - - - - - - - - - - - - - - - - - - - - - - - - - - - - - - - - - - - - - - - - - - - - - - - - - - - - - - - - - - - - - - - - - - - - - - - - - - - - - - - - - - - - - - - - - - - - - - - - - - - - - - - - - - - - - - - - - - - - - - - - - - - - - - - - - - - - - - - - - - - - - - - - - - - - - - - - - - - - - - - - - - - - - - - - - - - - - - - - - - - - - - - - - - - - - - - - - - - - - - - - - - - - - - - - - - - - - - - - - - - - - - - - - - - - - - - - - - - - - - - - - - - - - - - - - - - - - - - - - - - - - - - - - - - - - - - - - - - - - - - - - - - - - - - - - - - - - - - - - - - - - - - - - - - - - - - - - - - - - - - - - - - - - - - - - - - - - - - - - - - - - - - - - - - - - - - - - - - - - - - - - - - - - - - - |  |  |  |  |  |  |  |  |  |  |  |  |  |  |  |  |  |  |  |  |  |  |  |  |  |  |  |  |  |

|                                                                                             |          |   |   |   |   |   |   |   |   |   |   |   |   |   |          |          |   |   |          |          |          |          |   |   |   |   |   |   |   |   |   |          |          |          |   |   |   |   |                      |                        |                     |
|---------------------------------------------------------------------------------------------|----------|---|---|---|---|---|---|---|---|---|---|---|---|---|----------|----------|---|---|----------|----------|----------|----------|---|---|---|---|---|---|---|---|---|----------|----------|----------|---|---|---|---|----------------------|------------------------|---------------------|
| A A T G C A T T T G T C A A T G G A T A C C C T G G G G A T G G T G G A C G A T - Reference |          |   |   |   |   |   |   |   |   |   |   |   |   |   |          |          |   |   |          |          |          |          |   |   |   |   |   |   |   |   |   |          |          |          |   |   |   |   |                      |                        |                     |
| OIRx2                                                                                       |          |   |   |   |   |   |   |   |   |   |   |   |   |   |          |          |   |   |          |          |          |          |   |   |   |   |   |   |   |   |   |          |          |          |   |   |   |   |                      |                        |                     |
| A                                                                                           | A        | T | G | C | A | T | T | T | G | T | C | A | A | T | G        | G        | A | T | A        | C        | C        | C        | T | G | G | G | G | A | T | G | G | T        | G        | G        | A | C | G | A | T                    | - 75.55% (57679 reads) |                     |
| A                                                                                           | A        | T | G | C | A | T | T | T | G | T | C | A | A | T | G        | G        | - | - | -        | -        | -        | -        | - | - | G | G | A | T | G | G | T | G        | G        | A        | C | G | A | T | - 4.68% (3573 reads) |                        |                     |
| A                                                                                           | A        | T | G | C | A | T | T | T | G | T | C | A | A | T | G        | G        | A | T | -        | -        | -        | -        | - | - | - | - | - | - | G | G | T | G        | G        | A        | C | G | A | T | - 1.56% (1190 reads) |                        |                     |
| A                                                                                           | A        | T | G | C | A | T | T | T | G | T | C | A | A | T | G        | G        | A | T | A        | -        | -        | C        | T | G | G | G | G | A | T | G | G | T        | G        | G        | A | C | G | A | T                    | - 1.09% (833 reads)    |                     |
| A                                                                                           | A        | T | G | C | A | T | T | T | G | T | C | A | A | T | G        | G        | A | T | -        | -        | -        | -        | - | G | G | G | G | A | T | G | G | T        | G        | G        | A | C | G | A | T                    | - 1.05% (799 reads)    |                     |
| A                                                                                           | A        | T | G | C | A | T | T | T | G | T | C | A | A | T | G        | G        | A | T | A        | -        | -        | -        | - | G | G | G | G | A | T | G | G | T        | G        | G        | A | C | G | A | T                    | - 0.62% (475 reads)    |                     |
| A                                                                                           | A        | T | G | C | A | T | T | T | G | T | C | A | A | T | G        | G        | A | T | A        | -        | <b>G</b> | C        | T | G | G | G | G | A | T | G | G | T        | G        | G        | A | C | G | A | T                    | - 0.52% (396 reads)    |                     |
| A                                                                                           | A        | T | G | C | A | T | T | T | G | T | C | A | A | T | G        | G        | A | - | -        | -        | -        | -        | - | - | - | G | A | T | G | G | T | G        | G        | A        | C | G | A | T | - 0.44% (338 reads)  |                        |                     |
| A                                                                                           | A        | T | G | C | A | T | T | T | G | T | C | A | A | T | G        | G        | A | T | A        | <b>T</b> | C        | C        | C | T | G | G | G | G | A | T | G | G        | T        | G        | G | A | C | G | A                    | T                      | - 0.43% (327 reads) |
| A                                                                                           | A        | T | G | C | A | T | T | T | G | T | C | A | A | T | G        | G        | A | T | A        | -        | -        | -        | - | - | G | G | G | A | T | G | G | T        | G        | G        | A | C | G | A | T                    | - 0.34% (256 reads)    |                     |
| A                                                                                           | <b>A</b> | T | G | C | A | T | T | T | G | T | C | A | A | T | G        | G        | A | - | -        | C        | C        | C        | T | G | G | G | G | A | T | G | G | T        | G        | G        | A | C | G | A | T                    | - 0.33% (252 reads)    |                     |
| A                                                                                           | A        | T | G | C | A | T | T | T | G | T | C | A | A | T | G        | G        | A | - | -        | C        | C        | C        | T | G | G | G | G | A | T | G | G | T        | G        | G        | A | C | G | A | T                    | - 0.31% (236 reads)    |                     |
| A                                                                                           | A        | T | G | C | A | T | T | T | G | T | C | A | A | T | G        | G        | A | T | A        | <b>C</b> | C        | C        | C | T | G | G | G | G | A | T | G | G        | T        | G        | G | A | C | G | A                    | T                      | - 0.31% (233 reads) |
| A                                                                                           | A        | T | G | C | A | T | T | T | G | T | C | A | A | T | G        | G        | A | T | A        | -        | -        | -        | - | - | - | - | - | - | - | G | T | G        | G        | A        | C | G | A | T | - 0.30% (231 reads)  |                        |                     |
| A                                                                                           | A        | T | G | C | A | T | T | T | G | T | C | A | A | T | G        | G        | A | T | A        | -        | C        | C        | T | G | G | G | G | A | T | G | G | T        | G        | G        | A | C | G | A | T                    | - 0.29% (225 reads)    |                     |
| A                                                                                           | A        | T | G | C | A | T | T | T | G | T | C | A | A | T | G        | G        | A | T | A        | -        | -        | <b>G</b> | T | G | G | G | G | A | T | G | G | T        | G        | G        | A | C | G | A | T                    | - 0.29% (222 reads)    |                     |
| A                                                                                           | A        | T | G | C | A | T | T | T | G | T | C | A | A | T | G        | G        | A | T | -        | C        | C        | C        | T | G | G | G | G | A | T | G | G | T        | G        | G        | A | C | G | A | T                    | - 0.28% (215 reads)    |                     |
| A                                                                                           | A        | T | G | C | A | T | T | T | G | T | C | A | A | T | G        | G        | A | T | A        | -        | -        | -        | T | G | G | G | G | A | T | G | G | T        | G        | G        | A | C | G | A | T                    | - 0.25% (194 reads)    |                     |
| A                                                                                           | A        | T | G | C | A | T | T | T | G | T | C | A | A | T | G        | G        | A | T | <b>G</b> | -        | -        | <b>G</b> | T | G | G | G | G | A | T | G | G | T        | G        | G        | A | C | G | A | T                    | - 0.24% (182 reads)    |                     |
| A                                                                                           | A        | T | G | C | A | T | T | T | G | T | C | A | A | T | <b>C</b> | <b>C</b> | - | - | -        | C        | C        | C        | T | G | G | G | G | A | T | G | G | T        | G        | G        | A | C | G | A | T                    | - 0.22% (166 reads)    |                     |
| A                                                                                           | A        | T | G | C | A | T | T | T | G | T | C | A | A | T | G        | <b>C</b> | A | T | <b>T</b> | <b>T</b> | G        | A        | C | A | A | A | T | G | C | A | T | <b>T</b> | <b>G</b> | <b>T</b> | C | T | G | G | G                    | - 0.20% (154 reads)    |                     |

**bold**

Substitutions

Insertions

-

Deletions

-----

Predicted cleavage position

A A T G C A T T T G T C A A T G G A T A C C C T G G G G A T G G T G G A C G A T - Reference

OIRx2

|   |   |   |   |   |   |   |   |   |   |   |   |   |   |   |   |   |   |   |          |   |          |          |          |   |   |   |   |   |   |   |   |   |   |   |   |   |   |   |   |                    |                      |
|---|---|---|---|---|---|---|---|---|---|---|---|---|---|---|---|---|---|---|----------|---|----------|----------|----------|---|---|---|---|---|---|---|---|---|---|---|---|---|---|---|---|--------------------|----------------------|
| A | A | T | G | C | A | T | T | T | G | T | C | A | A | T | G | G | A | T | A        | C | C        | C        | T        | G | G | G | G | A | T | G | G | T | G | G | A | C | G | A | T | -                  | 78.65% (51126 reads) |
| A | A | T | G | C | A | T | T | T | G | T | C | A | A | T | G | G | - | - | -        | - | -        | -        | -        | - | G | G | A | T | G | G | T | G | G | A | C | G | A | T | - | 3.04% (1974 reads) |                      |
| A | A | T | G | C | A | T | T | T | G | T | C | A | A | T | G | G | A | T | A        | T | C        | C        | C        | C | T | G | G | G | G | A | T | G | G | T | G | G | A | C | G | -                  | 1.76% (1143 reads)   |
| A | A | T | G | C | A | T | T | T | G | T | C | A | A | T | G | G | A | T | -        | - | -        | -        | -        | - | - | - | - | - | G | G | T | G | G | A | C | G | A | T | - | 1.55% (1009 reads) |                      |
| A | A | T | G | C | A | T | T | T | G | T | C | A | A | T | G | G | A | T | -        | - | -        | -        | -        | G | G | G | G | A | T | G | G | T | G | G | A | C | G | A | T | -                  | 0.87% (564 reads)    |
| A | A | T | G | C | A | T | T | T | G | T | C | A | A | T | G | G | A | T | A        | - | -        | C        | T        | G | G | G | G | A | T | G | G | T | G | G | A | C | G | A | T | -                  | 0.82% (535 reads)    |
| A | A | T | G | C | A | T | T | T | G | T | C | A | A | T | G | G | A | T | A        | - | <b>G</b> | C        | T        | G | G | G | G | A | T | G | G | T | G | G | A | C | G | A | T | -                  | 0.44% (285 reads)    |
| A | A | T | G | C | A | T | T | T | G | T | C | A | A | T | - | - | - | - | -        | - | C        | C        | T        | G | G | G | G | A | T | G | G | T | G | G | A | C | G | A | T | -                  | 0.42% (270 reads)    |
| A | A | T | G | C | A | T | T | T | G | T | C | A | A | T | G | G | A | T | -        | C | C        | C        | T        | G | G | G | G | A | T | G | G | T | G | G | A | C | G | A | T | -                  | 0.42% (270 reads)    |
| A | A | T | G | C | A | T | T | T | G | T | C | A | A | T | G | G | A | T | A        | - | -        | -        | -        | G | G | G | G | A | T | G | G | T | G | G | A | C | G | A | T | -                  | 0.39% (251 reads)    |
| A | A | T | G | C | A | T | T | T | G | T | C | A | A | T | G | G | A | T | <b>G</b> | - | -        | <b>G</b> | T        | G | G | G | G | A | T | G | G | T | G | G | A | C | G | A | T | -                  | 0.33% (212 reads)    |
| A | A | T | G | C | A | T | T | T | G | T | C | A | A | T | G | G | A | T | A        | - | -        | -        | <b>G</b> | G | G | G | G | A | T | G | G | T | G | G | A | C | G | A | T | -                  | 0.28% (180 reads)    |
| A | A | T | G | C | A | T | T | T | G | T | C | A | A | T | G | G | A | T | A        | C | C        | C        | C        | T | G | G | G | G | A | T | G | G | T | G | G | A | C | G | A | -                  | 0.26% (172 reads)    |
| A | A | T | G | C | A | T | T | T | G | T | C | A | A | T | G | G | A | T | A        | - | -        | -        | T        | G | G | G | G | A | T | G | G | T | G | G | A | C | G | A | T | -                  | 0.25% (160 reads)    |
| A | A | T | G | C | A | T | T | T | G | T | C | A | A | T | G | G | A | T | A        | - | -        | -        | -        | - | G | G | G | A | T | G | G | T | G | G | A | C | G | A | T | -                  | 0.24% (155 reads)    |
| A | A | T | G | C | A | T | T | T | G | T | C | A | A | T | G | G | A | T | A        | - | C        | C        | T        | G | G | G | G | A | T | G | G | T | G | G | A | C | G | A | T | -                  | 0.22% (143 reads)    |
| A | A | T | G | C | A | T | T | T | G | T | C | A | A | T | G | G | A | T | A        | - | -        | <b>G</b> | T        | G | G | G | G | A | T | G | G | T | G | G | A | C | G | A | T | -                  | 0.20% (132 reads)    |

**bold**

Substitutions

Insertions

-

Deletions

-----

Predicted cleavage position

|                                                                                             |   |   |   |   |   |   |   |   |   |   |   |   |   |   |   |          |   |   |          |                       |          |          |          |          |          |   |   |   |   |   |   |   |   |   |   |   |   |   |                      |                        |  |
|---------------------------------------------------------------------------------------------|---|---|---|---|---|---|---|---|---|---|---|---|---|---|---|----------|---|---|----------|-----------------------|----------|----------|----------|----------|----------|---|---|---|---|---|---|---|---|---|---|---|---|---|----------------------|------------------------|--|
| A A T G C A T T T G T C A A T G G A T A C C C T G G G G A T G G T G G A C G A T - Reference |   |   |   |   |   |   |   |   |   |   |   |   |   |   |   |          |   |   |          |                       |          |          |          |          |          |   |   |   |   |   |   |   |   |   |   |   |   |   |                      |                        |  |
| OIRx2                                                                                       |   |   |   |   |   |   |   |   |   |   |   |   |   |   |   |          |   |   |          |                       |          |          |          |          |          |   |   |   |   |   |   |   |   |   |   |   |   |   |                      |                        |  |
| A                                                                                           | A | T | G | C | A | T | T | T | G | T | C | A | A | T | G | G        | A | T | A        | C                     | C        | C        | T        | G        | G        | G | G | A | T | G | G | T | G | G | A | C | G | A | T                    | - 78.79% (65230 reads) |  |
| A                                                                                           | A | T | G | C | A | T | T | T | G | T | C | A | A | T | G | G        | - | - | -        | -                     | -        | -        | -        | -        | G        | G | A | T | G | G | T | G | G | A | C | G | A | T | - 3.21% (2658 reads) |                        |  |
| A                                                                                           | A | T | G | C | A | T | T | T | G | T | C | A | A | T | G | G        | A | T | -        | -                     | -        | -        | -        | -        | -        | - | - | - | G | G | T | G | G | A | C | G | A | T | - 1.92% (1591 reads) |                        |  |
| A                                                                                           | A | T | G | C | A | T | T | T | G | T | C | A | A | T | G | G        | A | T | A        | -                     | -        | C        | T        | G        | G        | G | G | A | T | G | G | T | G | G | A | C | G | A | T                    | - 1.15% (952 reads)    |  |
| A                                                                                           | A | T | G | C | A | T | T | T | G | T | C | A | A | T | G | G        | A | T | -        | -                     | -        | -        | -        | G        | G        | G | G | A | T | G | G | T | G | G | A | C | G | A | T                    | - 0.63% (523 reads)    |  |
| A                                                                                           | A | T | G | C | A | T | T | T | G | T | C | A | A | T | G | G        | A | T | A        | -                     | <b>G</b> | C        | T        | G        | G        | G | G | A | T | G | G | T | G | G | A | C | G | A | T                    | - 0.50% (410 reads)    |  |
| A                                                                                           | A | T | G | C | A | T | T | T | G | T | C | A | A | T | G | G        | A | T | A        | -                     | -        | -        | T        | G        | G        | G | G | A | T | G | G | T | G | G | A | C | G | A | T                    | - 0.49% (406 reads)    |  |
| A                                                                                           | A | T | G | C | A | T | T | T | G | T | C | A | A | T | G | G        | A | T | A        | -                     | -        | -        | -        | G        | G        | G | G | A | T | G | G | T | G | G | A | C | G | A | T                    | - 0.43% (352 reads)    |  |
| A                                                                                           | A | T | G | C | A | T | T | T | G | T | C | A | A | T | G | G        | A | T | A        | A T T G A C A C C A T |          |          |          |          |          |   |   |   |   | C | C | C | T | G | G | G | G | A | - 0.33% (272 reads)  |                        |  |
| A                                                                                           | A | T | G | C | A | T | T | T | G | T | C | A | A | T | G | G        | A | T | A        | -                     | C        | C        | T        | G        | G        | G | G | A | T | G | G | T | G | G | A | C | G | A | T                    | - 0.29% (237 reads)    |  |
| A                                                                                           | A | T | G | C | A | T | T | T | G | T | C | A | A | T | G | G        | A | T | A        | -                     | -        | <b>G</b> | T        | G        | G        | G | G | A | T | G | G | T | G | G | A | C | G | A | T                    | - 0.26% (218 reads)    |  |
| A                                                                                           | A | T | G | C | A | T | T | T | G | T | C | A | A | T | G | G        | A | T | <b>G</b> | -                     | <b>G</b> | <b>T</b> | <b>G</b> | G        | G        | G | G | A | T | G | G | T | G | G | A | C | G | A | T                    | - 0.25% (209 reads)    |  |
| A                                                                                           | A | T | G | C | A | T | T | T | G | T | C | A | A | T | G | G        | A | T | A        | -                     | -        | -        | -        | -        | G        | G | G | A | T | G | G | T | G | G | A | C | G | A | T                    | - 0.25% (204 reads)    |  |
| A                                                                                           | A | T | G | C | A | T | T | T | G | T | C | A | A | T | G | G        | A | T | -        | C                     | C        | C        | T        | G        | G        | G | G | A | T | G | G | T | G | G | A | C | G | A | T                    | - 0.22% (180 reads)    |  |
| A                                                                                           | A | T | G | C | A | T | T | T | G | T | C | A | A | T | G | G        | A | T | <b>G</b> | G A T                 |          |          | <b>G</b> | <b>G</b> | <b>A</b> | T | G | G | G | G | A | T | G | G | T | G | G | A | C                    | - 0.21% (176 reads)    |  |
| A                                                                                           | A | T | G | C | A | T | T | T | G | T | C | A | A | T | G | G        | A | T | A        | T                     | C        | C        | C        | T        | G        | G | G | G | A | T | G | G | T | G | G | A | C | G | A                    | - 0.20% (167 reads)    |  |
| A                                                                                           | A | T | G | C | A | T | T | T | G | T | C | A | A | T | G | <b>C</b> | A | T | <b>T</b> | <b>T</b>              | <b>G</b> | C        | C        | T        | G        | G | G | G | A | T | G | G | T | G | G | A | C | G | A                    | - 0.20% (166 reads)    |  |

**bold**

Substitutions

Insertions

-

Deletions

-----

Predicted cleavage position

A A T G C A T T T G T C A A T G G A T A C C C T G G G G A T G G T G G A C G A T - Reference

*OIRx2* 

A A T G C A T T T G T C A A T G G A T A C C C T G G G G A T G G T G G A C G A T - 98.82% (72872 reads)

**bold**



-

-----

Substitutions

Insertions

Deletions

Predicted cleavage position

uninjected pool1 *OIRx2*

A A T G C A T T T G T C A A T G G A T A C C C T G G G G A T G G T G G A C G A T - Reference

*OIRx2* 

A A T G C A T T T G T C A A T G G A T A | C C C T G G G G A T G G T G G A C G A T - 98.95% (72676 reads)

**bold**



-

-----

Substitutions

Insertions

Deletions

Predicted cleavage position

uninjected pool2 *OIRx2*

A A T G C A T T T G T C A A T G G A T A C C C T G G G G A T G G T G G A C G A T - Reference

*OIRx2* 

A A T G C A T T T G T C A A T G G A T A | C C C T G G G G A T G G T G G A C G A T - 98.74% (82153 reads)

**bold**



-

-----

Substitutions

Insertions

Deletions

Predicted cleavage position

uninjected pool3 *OIRx2*

|         |   |   |   |          |   |   |   |   |   |   |   |   |          |          |          |          |          |          |          |          |          |          |          |          |          |   |   |   |   |   |   |   |   |   |   |   |   |                    |   |                    |                     |                      |
|---------|---|---|---|----------|---|---|---|---|---|---|---|---|----------|----------|----------|----------|----------|----------|----------|----------|----------|----------|----------|----------|----------|---|---|---|---|---|---|---|---|---|---|---|---|--------------------|---|--------------------|---------------------|----------------------|
| C       | T | G | C | T        | C | C | C | T | G | T | C | T | G        | C        | C        | G        | A        | T        | G        | G        | A        | C        | T        | G        | C        | T | G | A | C | C | C | T | G | A | C | C | G | G                  | G | -                  | Reference           |                      |
| OICryaa |   |   |   |          |   |   |   |   |   |   |   |   |          |          |          |          |          |          |          |          |          |          |          |          |          |   |   |   |   |   |   |   |   |   |   |   |   |                    |   |                    |                     |                      |
| C       | T | G | C | T        | C | C | C | T | G | T | C | T | G        | C        | C        | G        | A        | -        | -        | -        | -        | -        | C        | T        | G        | C | T | G | A | C | C | C | T | G | A | C | C | G                  | G | G                  | -                   | 25.57% (16273 reads) |
| C       | T | G | C | T        | C | C | C | T | G | T | C | T | G        | C        | C        | G        | A        | T        | G        | -        | -        | -        | -        | -        | C        | T | G | A | C | C | C | T | G | A | C | C | G | G                  | G | -                  | 13.58% (8639 reads) |                      |
| C       | T | G | C | T        | C | C | C | T | G | T | C | T | G        | C        | -        | -        | -        | -        | -        | -        | -        | -        | -        | -        | T        | G | A | C | C | C | T | G | A | C | C | G | G | G                  | - | 5.73% (3649 reads) |                     |                      |
| C       | T | G | C | T        | C | C | C | T | G | T | C | T | G        | C        | C        | G        | A        | T        | G        | C        | T        | G        | A        | C        | T        | G | A | C | C | C | T | G | A | C | C | G | - | 5.00% (3179 reads) |   |                    |                     |                      |
| C       | T | G | C | T        | C | C | C | T | G | T | C | T | G        | C        | C        | G        | A        | <b>C</b> | <b>C</b> | G        | A        | C        | T        | G        | C        | T | G | A | C | C | C | T | G | A | C | C | G | G                  | G | -                  | 4.78% (3041 reads)  |                      |
| C       | T | G | C | T        | C | C | C | T | G | T | C | T | G        | <b>T</b> | <b>C</b> | <b>T</b> | A        | T        | <b>T</b> | -        | A        | <b>T</b> | T        | <b>C</b> | <b>T</b> | T | G | A | C | C | C | T | G | A | C | C | G | G                  | G | -                  | 3.57% (2270 reads)  |                      |
| C       | T | G | C | T        | C | C | C | T | G | - | - | - | -        | -        | -        | -        | -        | -        | -        | -        | A        | C        | T        | G        | C        | T | G | A | C | C | C | T | G | A | C | C | G | G                  | G | -                  | 3.51% (2235 reads)  |                      |
| C       | T | G | C | T        | C | C | C | T | G | T | C | T | G        | C        | C        | G        | A        | -        | -        | -        | -        | -        | -        | -        | -        | - | - | - | - | - | - | - | - | - | - | - | - | -                  | - | 3.41% (2171 reads) |                     |                      |
| C       | T | G | C | T        | C | C | C | T | G | T | C | T | G        | C        | C        | G        | A        | T        | G        | -        | -        | -        | -        | -        | -        | - | - | - | - | - | - | - | - | A | C | C | G | G                  | G | -                  | 2.90% (1845 reads)  |                      |
| C       | T | G | C | T        | C | C | C | T | G | T | C | T | G        | C        | C        | G        | A        | T        | G        | A        | C        | T        | G        | A        | C        | T | G | C | T | G | A | C | C | C | T | G | A | C                  | C | -                  | 2.22% (1415 reads)  |                      |
| C       | T | G | C | T        | C | C | C | T | G | T | C | T | <b>T</b> | <b>C</b> | <b>A</b> | -        | A        | T        | G        | A        | T        | T        | T        | G        | T        | G | A | T | C | C | T | C | A | C | T | G | G | T                  | G | -                  | 2.11% (1340 reads)  |                      |
| C       | - | - | - | -        | - | - | - | - | - | - | - | - | -        | -        | -        | -        | -        | -        | -        | -        | -        | -        | -        | -        | -        | - | - | - | - | - | - | - | - | - | - | - | - | -                  | - | 2.09% (1332 reads) |                     |                      |
| C       | T | G | C | T        | C | C | C | T | G | T | C | T | G        | -        | -        | -        | -        | -        | -        | -        | -        | -        | -        | -        | -        | - | - | - | - | - | - | - | A | C | C | G | G | G                  | - | 2.08% (1323 reads) |                     |                      |
| T       | G | C | T | <b>G</b> | C | C | C | T | G | T | C | T | G        | C        | C        | G        | A        | T        | G        | C        | C        | G        | A        | C        | T        | G | C | T | G | A | C | C | C | T | G | A | C | C                  | G | -                  | 1.91% (1215 reads)  |                      |
| C       | T | G | C | T        | C | C | C | T | G | T | C | T | G        | C        | C        | G        | A        | -        | -        | -        | -        | -        | -        | -        | -        | - | - | - | C | C | C | T | G | A | C | C | G | G                  | G | -                  | 1.68% (1070 reads)  |                      |
| C       | T | G | C | T        | C | C | C | T | G | T | C | T | G        | C        | C        | <b>C</b> | -        | -        | -        | G        | A        | C        | T        | G        | C        | T | G | A | C | C | C | T | G | A | C | C | G | G                  | G | -                  | 1.50% (955 reads)   |                      |
| C       | T | G | C | T        | C | C | C | T | G | T | C | T | G        | C        | C        | G        | A        | T        | <b>C</b> | C        | C        | T        | G        | A        | C        | T | G | C | T | G | A | C | C | C | T | G | A | C                  | C | -                  | 1.48% (942 reads)   |                      |
| C       | T | G | C | T        | C | C | C | T | G | T | C | T | G        | C        | C        | G        | A        | T        | G        | -        | -        | -        | -        | -        | -        | - | - | A | C | C | C | T | G | A | C | C | G | G                  | G | -                  | 1.43% (910 reads)   |                      |
| C       | T | G | C | T        | C | C | C | T | G | T | C | T | G        | C        | C        | G        | A        | T        | G        | G        | C        | C        | T        | T        | C        | T | T | G | A | C | T | G | C | T | G | A | C | C                  | C | -                  | 1.39% (887 reads)   |                      |
| C       | T | G | C | T        | C | C | C | T | G | T | C | T | G        | C        | C        | G        | A        | T        | G        | <b>C</b> | <b>C</b> | <b>T</b> | <b>G</b> | <b>T</b> | C        | T | G | A | C | C | C | T | G | A | C | C | G | G                  | G | -                  | 1.32% (839 reads)   |                      |
| C       | T | G | C | T        | C | C | C | T | G | T | C | T | G        | <b>G</b> | C        | -        | -        | -        | -        | -        | -        | -        | -        | -        | -        | - | - | - | C | C | T | G | A | C | C | G | G | G                  | - | 1.28% (812 reads)  |                     |                      |
| C       | T | G | C | T        | C | C | C | T | G | T | C | T | G        | C        | C        | G        | A        | T        | G        | C        | T        | A        | G        | G        | G        | C | C | T | T | T | G | G | C | C | C | T | G | A                  | C | -                  | 1.26% (801 reads)   |                      |
| C       | T | G | C | T        | C | C | C | T | G | T | C | T | G        | C        | C        | G        | A        | -        | -        | -        | -        | -        | -        | -        | -        | - | - | - | - | - | - | - | - | - | - | - | - | -                  | - | -                  | 1.02% (651 reads)   |                      |
| C       | T | G | C | T        | C | C | C | T | G | T | C | T | G        | C        | C        | G        | A        | T        | G        | -        | A        | C        | T        | G        | C        | T | G | A | C | C | C | T | G | A | C | C | G | G                  | G | -                  | 0.97% (616 reads)   |                      |
| C       | T | G | C | T        | C | C | C | T | G | T | C | T | G        | C        | C        | G        | <b>T</b> | -        | -        | -        | -        | C        | T        | G        | C        | T | G | A | C | C | C | T | G | A | C | C | G | G                  | G | -                  | 0.95% (606 reads)   |                      |
| C       | T | G | C | T        | C | C | C | T | G | T | C | T | G        | -        | -        | -        | -        | -        | -        | -        | -        | -        | -        | -        | -        | - | - | A | C | C | C | T | G | A | C | C | G | G                  | G | -                  | 0.90% (575 reads)   |                      |
| C       | T | G | C | T        | C | C | C | T | G | T | C | T | G        | -        | -        | -        | -        | -        | -        | -        | A        | C        | T        | G        | C        | T | G | A | C | C | C | T | G | A | C | C | G | G                  | G | -                  | 0.86% (547 reads)   |                      |
| C       | T | G | C | T        | C | C | C | T | G | T | C | T | G        | C        | C        | G        | A        | T        | G        | <b>A</b> | <b>C</b> | <b>C</b> | C        | T        | G        | C | T | G | A | C | C | C | T | G | A | C | C | G                  | G | -                  | 0.82% (519 reads)   |                      |
| C       | T | G | C | T        | C | C | C | T | G | - | - | - | -        | -        | -        | -        | -        | -        | -        | -        | -        | -        | -        | -        | -        | C | T | G | A | C | C | C | T | G | A | C | C | G                  | G | G                  | -                   | 0.70% (447 reads)    |
| -       | - | - | - | -        | - | - | - | - | - | - | - | - | -        | -        | -        | -        | -        | -        | -        | G        | A        | C        | T        | G        | C        | T | G | A | C | C | C | T | G | A | C | C | G | G                  | G | -                  | 0.69% (439 reads)   |                      |
| C       | T | G | C | T        | C | C | C | T | G | T | C | T | G        | C        | C        | G        | A        | T        | G        | A        | C        | A        | G        | G        | A        | G | C | A | G | G | T | G | A | T | G | G | C | C                  | - | 0.55% (350 reads)  |                     |                      |
| -       | - | - | - | -        | - | - | - | - | - | - | - | - | -        | -        | -        | -        | -        | -        | -        | -        | -        | -        | -        | -        | -        | - | - | - | - | - | - | - | - | - | - | - | - | -                  | - | 0.46% (292 reads)  |                     |                      |
| -       | - | - | - | -        | - | - | - | - | - | - | - | - | -        | -        | -        | -        | -        | -        | -        | -        | -        | -        | -        | -        | -        | C | T | G | A | C | C | C | T | G | A | C | C | G                  | G | G                  | -                   | 0.25% (161 reads)    |
| C       | T | G | C | T        | C | C | C | - | - | - | - | - | -        | -        | -        | -        | -        | -        | -        | -        | -        | -        | -        | -        | -        | - | - | - | - | - | - | - | - | - | - | - | - | -                  | - | -                  | 0.21% (135 reads)   |                      |

**bold** Substitutions

Insertions

- Deletions

----- Predicted cleavage position

|                |   |   |   |   |   |   |   |   |   |   |   |   |   |   |   |   |   |   |   |   |   |   |   |   |   |   |   |   |   |   |   |   |   |   |   |   |   |   |   |                      |                      |                    |
|----------------|---|---|---|---|---|---|---|---|---|---|---|---|---|---|---|---|---|---|---|---|---|---|---|---|---|---|---|---|---|---|---|---|---|---|---|---|---|---|---|----------------------|----------------------|--------------------|
| C              | T | G | C | T | C | C | C | T | G | T | C | T | G | C | C | G | A | T | G | G | A | C | T | G | C | T | G | A | C | C | C | T | G | A | C | C | G | G | G | -                    | Reference            |                    |
| <i>OICryaa</i> |   |   |   |   |   |   |   |   |   |   |   |   |   |   |   |   |   |   |   |   |   |   |   |   |   |   |   |   |   |   |   |   |   |   |   |   |   |   |   |                      |                      |                    |
| C              | T | G | C | T | C | C | C | T | G | T | C | T | G | C | C | G | A | - | - | - | - | C | T | G | C | T | G | A | C | C | C | T | G | A | C | C | G | G | G | -                    | 22.57% (15256 reads) |                    |
| C              | T | G | C | T | C | C | C | T | G | T | C | T | G | C | - | - | - | - | - | - | - | - | - | - | T | G | A | C | C | C | T | G | A | C | C | G | G | G | - | 15.22% (10292 reads) |                      |                    |
| C              | T | G | C | T | C | C | C | T | G | T | C | T | G | C | C | G | A | T | G | - | A | C | T | G | C | T | G | A | C | C | C | T | G | A | C | C | G | G | G | -                    | 9.59% (6482 reads)   |                    |
| C              | T | G | C | T | C | C | C | T | G | T | C | T | G | C | C | G | A | T | G | - | - | - | - | - | - | - | - | - | - | - | - | - | - | - | - | - | - | - | - | -                    | 8.22% (5555 reads)   |                    |
| C              | T | G | C | T | C | C | C | T | G | T | C | T | G | C | C | G | A | T | G | - | - | - | - | - | C | T | G | A | C | C | C | T | G | A | C | C | G | G | G | -                    | 5.99% (4047 reads)   |                    |
| C              | T | G | C | T | C | C | C | T | G | T | C | T | G | C | C | G | A | T | G | - | - | C | T | G | C | T | G | A | C | C | C | T | G | A | C | C | G | G | G | -                    | 4.38% (2961 reads)   |                    |
| C              | T | G | C | T | C | C | C | T | G | T | C | T | G | C | C | G | A | - | - | - | - | - | - | - | - | - | - | C | C | C | T | G | A | C | C | G | G | G | - | 4.08% (2757 reads)   |                      |                    |
| C              | T | G | C | T | C | C | C | T | G | T | C | T | G | C | C | - | - | T | G | - | - | C | T | T | T | T | G | A | C | C | C | T | G | A | C | C | G | G | G | -                    | 4.08% (2757 reads)   |                    |
| C              | T | C | C | C | T | G | T | C | T | G | C | C | G | A | T | C | A | G | G | G | T | C | T | G | C | T | G | A | C | C | C | T | G | A | C | C | G | G | G | -                    | 2.91% (1970 reads)   |                    |
| G              | C | C | A | T | C | A | C | C | T | G | C | T | C | C | C | - | - | - | - | - | - | - | - | T | G | C | T | G | A | C | C | C | T | G | A | C | C | G | G | G                    | -                    | 2.55% (1724 reads) |
| C              | T | G | C | T | C | C | C | T | G | T | C | T | G | - | - | - | - | - | - | - | A | C | T | G | C | T | G | A | C | C | C | T | G | A | C | C | G | G | G | -                    | 2.52% (1701 reads)   |                    |
| C              | T | G | C | T | C | C | C | T | G | T | C | T | G | C | C | G | A | T | G | A | G | T | T | T | C | G | A | G | A | C | T | G | C | T | G | A | C | C | C | -                    | 2.36% (1598 reads)   |                    |
| -              | - | - | - | - | - | - | - | - | - | - | - | - | - | - | - | - | - | - | - | - | A | C | T | G | C | T | G | A | C | C | C | T | G | A | C | C | G | G | G | -                    | 1.95% (1315 reads)   |                    |
| -              | - | - | C | T | C | C | C | - | - | - | - | - | - | - | - | - | - | - | - | - | - | C | T | G | C | T | G | A | C | C | C | T | G | A | C | C | G | G | G | -                    | 1.65% (1113 reads)   |                    |
| C              | T | G | C | T | C | C | C | T | G | T | C | T | G | C | T | G | A | C | C | C | T | G | A | C | C | C | T | G | A | T | G | C | C | A | C | C | T | G | C | -                    | 1.54% (1042 reads)   |                    |
| C              | T | G | C | T | C | C | C | T | G | T | A | T | G | C | C | G | A | - | - | - | - | C | T | G | C | T | G | A | C | C | C | T | G | A | C | C | G | G | G | -                    | 1.51% (1019 reads)   |                    |
| C              | T | G | C | T | C | C | C | T | G | T | C | T | G | C | C | - | - | - | - | - | - | - | - | - | - | - | - | - | C | C | T | G | A | C | C | G | G | G | - | 1.15% (777 reads)    |                      |                    |
| C              | T | G | C | T | C | C | C | T | G | T | C | T | G | C | C | G | A | T | G | C | T | G | A | C | T | G | C | T | G | A | C | C | C | T | G | A | C | C | G | -                    | 1.03% (693 reads)    |                    |
| C              | T | G | C | T | C | C | C | T | G | T | C | T | G | C | C | G | A | T | G | C | C | C | C | T | G | A | C | C | G | G | G | C | C | A | T | G | A | C | - | 0.90% (606 reads)    |                      |                    |
| C              | T | G | C | T | C | C | C | T | G | T | C | T | G | C | C | T | - | - | - | - | G | A | C | T | G | C | T | G | A | C | C | C | T | G | A | C | C | G | G | G                    | -                    | 0.84% (565 reads)  |
| C              | T | G | C | T | C | C | C | T | G | T | C | T | G | C | C | G | A | T | G | T | C | T | G | T | C | A | G | A | C | T | G | C | T | G | A | C | C | C | T | -                    | 0.72% (486 reads)    |                    |
| C              | T | G | C | T | C | C | C | T | G | T | C | T | G | C | C | G | A | T | G | T | T | C | T | G | C | C | G | A | C | T | G | C | T | G | A | C | C | C | T | -                    | 0.41% (274 reads)    |                    |
| C              | T | G | C | T | C | C | C | T | G | T | C | T | G | C | C | G | - | - | - | - | - | C | T | G | C | T | G | A | C | C | C | T | G | A | C | C | G | G | G | -                    | 0.38% (256 reads)    |                    |
| C              | T | G | C | T | C | C | C | T | G | T | C | T | G | C | C | G | A | C | C | C | T | G | A | C | T | G | G | T | C | A | T | A | G | C | T | G | C | A | A | -                    | 0.35% (235 reads)    |                    |
| C              | T | G | C | T | C | C | C | T | G | T | C | T | G | C | C | G | A | T | G | - | - | - | - | - | - | - | - | - | - | - | - | - | A | C | C | G | G | G | - | 0.33% (222 reads)    |                      |                    |
| C              | T | G | C | T | C | C | C | T | G | T | C | T | G | C | C | G | A | T | G | C | T | G | C | T | G | A | C | T | G | C | T | G | A | C | C | C | T | G | A | -                    | 0.31% (212 reads)    |                    |
| -              | - | - | - | - | - | - | - | - | - | - | - | T | G | C | A | G | A | - | - | - | - | C | T | G | C | T | G | - | - | - | - | - | - | - | - | - | - | - | G | G                    | -                    | 0.25% (172 reads)  |
| C              | T | G | C | T | C | C | C | T | G | T | C | T | G | C | C | G | A | T | - | - | - | - | T | G | C | T | G | A | C | C | C | T | G | A | C | C | G | G | G | -                    | 0.24% (161 reads)    |                    |
| C              | T | G | C | T | C | C | C | T | G | T | C | T | G | C | C | G | A | T | G | - | - | - | - | - | - | - | - | A | C | C | C | T | G | A | C | C | G | G | G | -                    | 0.23% (157 reads)    |                    |
| C              | T | G | C | T | C | C | C | T | G | T | C | T | G | C | C | G | A | T | G | C | T | G | A | C | C | - | C | T | G | A | C | C | C | T | G | A | C | C | G | -                    | 0.21% (139 reads)    |                    |

**bold** Substitutions

Insertions

- Deletions

----- Predicted cleavage position

|                |   |   |   |   |   |   |   |   |   |   |   |   |   |   |   |   |   |   |   |   |   |   |   |   |   |   |   |   |   |   |   |   |   |   |   |   |                    |   |                   |                    |                      |                    |
|----------------|---|---|---|---|---|---|---|---|---|---|---|---|---|---|---|---|---|---|---|---|---|---|---|---|---|---|---|---|---|---|---|---|---|---|---|---|--------------------|---|-------------------|--------------------|----------------------|--------------------|
| C              | T | G | C | T | C | C | C | T | G | T | C | T | G | C | C | G | A | T | G | G | A | C | T | G | C | T | G | A | C | C | C | T | G | A | C | C | G                  | G | G                 | -                  | Reference            |                    |
| <i>OICryaa</i> |   |   |   |   |   |   |   |   |   |   |   |   |   |   |   |   |   |   |   |   |   |   |   |   |   |   |   |   |   |   |   |   |   |   |   |   |                    |   |                   |                    |                      |                    |
| C              | T | G | C | T | C | C | C | T | G | T | C | T | G | C | C | G | A | - | - | - | - | C | T | G | C | T | G | A | C | C | C | T | G | A | C | C | G                  | G | G                 | -                  | 20.77% (14376 reads) |                    |
| C              | T | G | C | T | C | C | C | T | G | T | C | T | G | C | - | - | - | - | - | - | - | - | - | - | - | T | G | A | C | C | C | T | G | A | C | C | G                  | G | G                 | -                  | 15.62% (10813 reads) |                    |
| C              | T | G | C | T | C | C | C | T | G | T | C | T | G | C | C | G | A | T | G | - | - | - | - | - | C | T | G | A | C | C | C | T | G | A | C | C | G                  | G | G                 | -                  | 12.84% (8889 reads)  |                    |
| C              | T | G | C | T | C | C | C | T | G | - | - | - | - | - | - | - | - | - | - | - | A | C | T | G | C | T | G | A | C | C | C | T | G | A | C | C | G                  | G | G                 | -                  | 10.36% (7169 reads)  |                    |
| C              | T | G | C | T | C | C | C | T | G | T | C | T | G | C | C | G | A | T | G | - | A | C | T | G | C | T | G | A | C | C | C | T | G | A | C | C | G                  | G | G                 | -                  | 6.03% (4172 reads)   |                    |
| C              | T | G | C | T | C | C | C | T | G | T | C | T | A | C | C | G | G | T | C | C | C | T | G | T | C | T | G | T | C | C | G | T | A | T | T | C | G                  | G | -                 | 3.84% (2658 reads) |                      |                    |
| C              | T | G | C | T | C | C | C | T | G | A | - | T | G | C | C | G | A | T | G | - | A | C | T | G | C | T | G | A | C | C | C | T | G | A | C | C | G                  | G | G                 | -                  | 2.96% (2048 reads)   |                    |
| C              | T | G | C | T | C | C | C | T | G | T | C | T | G | C | C | G | A | T | G |   | C | T | G | A | C | C | C | T | G | A | C | C | G | G | G | - | 2.94% (2037 reads) |   |                   |                    |                      |                    |
| -              | - | - | - | - | - | - | - | - | - | - | - | - | - | - | - | - | - | - | - | G | A | C | T | G | C | T | G | A | C | C | C | T | G | A | C | C | G                  | G | G                 | -                  | 1.89% (1310 reads)   |                    |
| C              | T | G | C | T | C | C | C | T | G | - | - | - | - | - | - | - | - | - | - | - | - | - | - | C | T | G | A | C | C | C | T | G | A | C | C | G | G                  | G | -                 | 1.87% (1293 reads) |                      |                    |
| C              | T | G | C | T | C | C | C | T | G | T | C | T | G | C | C | G | A | T | G |   | A | C | A | G | G | G | A | G | C | T | G | G | C | C | T | T | T                  | G | G                 | C                  | -                    | 1.77% (1222 reads) |
| C              | T | G | C | T | C | C | C | T | G | T | C | T | G | C | C | G | - | - | - | - | - | - | - | - | - | - | - | - | - | - | - | - | - | - | - | - | -                  | - | G                 | G                  | -                    | 1.74% (1205 reads) |
| C              | T | G | C | T | C | C | C | T | G | T | C | T | G | - | - | - | - | - | - | - | A | C | T | G | C | T | G | A | C | C | C | T | G | A | C | C | G                  | G | G                 | -                  | 1.66% (1150 reads)   |                    |
| C              | T | G | C | T | C | C | C | T | G | T | C | T | G | C | C | G | A | T | G | - | - | C | T | G | C | T | G | A | C | C | C | T | G | A | C | C | G                  | G | G                 | -                  | 1.61% (1115 reads)   |                    |
| C              | T | G | C | T | C | C | C | T | G | T | C | T | G | C | C | G | A | T | G | G | G | A | - | G | C | T | G | A | C | C | C | T | G | A | C | C | G                  | G | G                 | -                  | 1.40% (969 reads)    |                    |
| C              | T | G | C | T | C | C | C | T | G | T | C | T | G | G | A | G | G | T | C | A | G | C | - | - | - | - | - | - | - | - | - | - | - | - | - | - | -                  | - | -                 | -                  | 1.39% (964 reads)    |                    |
| C              | T | G | C | T | C | C | C | T | G | T | C | T | G | C | C | G | A | T | G |   | C | A | C | T | C | A | C | T | G | C | T | G | A | C | C | C | T                  | G | A                 | C                  | -                    | 1.29% (891 reads)  |
| C              | T | G | C | T | C | C | C | T | G | T | C | T | G | C | C | G | A | T | G |   | T | C | T | G | C | C | G | A | C | T | G | C | T | G | A | C | C                  | C | T                 | G                  | -                    | 1.22% (844 reads)  |
| T              | G | C | T | C | C | C | T | G | T | C | A | T | G | C | C | G | A | - | - | - | - | C | T | G | C | T | G | A | C | C | C | T | G | A | C | C | G                  | G | G                 | -                  | 1.18% (818 reads)    |                    |
| C              | T | G | C | T | C | C | C | T | G | T | C | T | G | C | C | G | A | T | G | - | - | - | - | - | - | - | A | C | C | C | T | G | A | C | C | G | G                  | G | -                 | 0.97% (670 reads)  |                      |                    |
| C              | T | G | C | T | C | C | C | T | G | T | C | T | G | C | C | - | - | - | - | - | - | - | C | T | G | C | T | G | A | C | C | C | T | G | A | C | C                  | G | G                 | G                  | -                    | 0.91% (627 reads)  |
| C              | T | G | C | T | C | C | C | T | G | - | - | - | - | - | - | - | - | - | - | - | - | - | - | - | - | - | - | - | - | - | - | - | A | C | C | G | G                  | G | -                 | 0.74% (509 reads)  |                      |                    |
| C              | T | G | C | T | C | C | C | T | G | T | C | T | G | C | C | G | A | T | G |   | A | C | T | G | A | C | C | C | T | G | C | T | G | A | C | C | C                  | T | G                 | A                  | -                    | 0.59% (406 reads)  |
| C              | T | G | C | T | C | C | C | T | G | T | C | T | G | C | C | G | A | T | T | G |   | C | T | T | T | T | C | G | T | C | A | C | T | G | C | T | G                  | A | C                 | C                  | -                    | 0.56% (385 reads)  |
| C              | T | G | C | T | C | C | C | T | G | T | C | T | G | - | - | - | - | - | - | - | - | - | - | - | - | - | - | - | - | - | - | - | A | C | C | G | G                  | G | -                 | 0.50% (348 reads)  |                      |                    |
| C              | T | G | C | T | C | C | C | T | G | T | C | T | G | C | C | G | A | T | G |   | G | G | A | C | T | G | C | T | G | A | C | C | C | T | G | A | C                  | C | G                 | G                  | -                    | 0.46% (317 reads)  |
| C              | T | G | C | T | C | C | C | T | G | T | C | T | G | C | C | G | A | T | G | - | T | C | T | G | C | T | G | A | C | C | C | T | G | A | C | C | G                  | G | G                 | -                  | 0.33% (228 reads)    |                    |
| C              | T | G | C | T | C | C | C | T | G | C | T | - | - | - | - | - | - | - | - | - | - | - | - | - | - | - | - | - | C | C | T | G | A | C | C | G | G                  | G | -                 | 0.24% (169 reads)  |                      |                    |
| C              | T | G | C | T | C | C | C | T | G | T | C | G | C | A | T | T | A | T | T |   | C | C | C | T | G | T | C | C | G | A | C | T | G | A | C | C | C                  | - | 0.21% (142 reads) |                    |                      |                    |

**bold**
Substitutions

Insertions

-
Deletions

-----
Predicted cleavage position

|         |   |   |   |   |   |   |   |   |   |   |   |   |   |   |   |   |   |   |   |   |   |   |   |   |   |   |   |   |   |   |   |   |   |   |   |   |   |   |                    |                    |                      |                    |                   |
|---------|---|---|---|---|---|---|---|---|---|---|---|---|---|---|---|---|---|---|---|---|---|---|---|---|---|---|---|---|---|---|---|---|---|---|---|---|---|---|--------------------|--------------------|----------------------|--------------------|-------------------|
| C       | T | G | C | T | C | C | C | T | G | T | C | T | G | C | C | G | A | T | G | G | A | C | T | G | C | T | G | A | C | C | C | T | G | A | C | C | G | G | G                  | -                  | Reference            |                    |                   |
| OICryaa |   |   |   |   |   |   |   |   |   |   |   |   |   |   |   |   |   |   |   |   |   |   |   |   |   |   |   |   |   |   |   |   |   |   |   |   |   |   |                    |                    |                      |                    |                   |
| C       | T | G | C | T | C | C | C | T | G | T | C | T | G | C | C | G | A | - | - | - | - | C | T | G | C | T | G | A | C | C | C | T | G | A | C | C | G | G | G                  | -                  | 35.88% (25701 reads) |                    |                   |
| C       | T | G | C | T | C | C | C | T | G | T | C | T | G | C | C | G | A | T | G | G | A | C | T | G | C | T | G | A | C | C | C | T | G | A | C | C | G | G | G                  | -                  | 8.85% (6339 reads)   |                    |                   |
| C       | T | G | C | T | C | C | C | T | G | T | C | T | G | C | C | G | A | T | G | - | - | - | - | - | - | C | T | G | A | C | C | C | T | G | A | C | C | G | G                  | G                  | -                    | 8.77% (6282 reads) |                   |
| C       | T | G | C | T | C | C | C | T | G | T | C | T | G | C | - | - | - | - | - | - | - | - | - | - | T | G | A | C | C | C | T | G | A | C | C | G | G | G | -                  | 3.54% (2539 reads) |                      |                    |                   |
| C       | T | G | C | T | C | C | C | T | G | T | C | T | G | C | C | G | A | T | G | - | A | C | T | G | C | T | G | A | C | C | C | T | G | A | C | C | G | G | G                  | -                  | 2.63% (1884 reads)   |                    |                   |
| C       | T | G | C | T | C | C | C | T | G | T | C | T | G | C | C | G | A | T | G | C | T | G | A | C | T | G | A | C | C | C | C | T | G | A | C | C | G | - | 2.61% (1866 reads) |                    |                      |                    |                   |
| C       | T | G | C | T | C | C | C | T | G | T | C | T | G | C | C | G | A | T | G | C | C | G | A | T | G | C | T | G | A | C | C | C | T | G | A | C | C | G | -                  | 2.36% (1688 reads) |                      |                    |                   |
| C       | T | G | C | T | C | C | C | T | G | T | C | T | G | C | C | T | G | - | - | - | - | C | T | G | C | T | G | A | C | C | C | T | G | A | C | C | G | G | G                  | -                  | 2.22% (1592 reads)   |                    |                   |
| C       | T | G | C | T | C | C | C | T | G | - | - | - | - | - | - | - | - | - | - | - | A | C | T | G | C | T | G | A | C | C | C | T | G | A | C | C | G | G | G                  | -                  | 1.83% (1308 reads)   |                    |                   |
| C       | T | G | C | T | C | C | C | T | G | T | C | T | G | C | C | G | A | T | G | - | - | - | - | - | - | - | A | C | C | C | T | G | A | C | C | G | G | G | -                  | 1.75% (1254 reads) |                      |                    |                   |
| C       | T | G | C | T | C | C | C | T | G | T | C | T | G | C | C | G | A | - | - | - | - | - | - | - | - | - | - | C | C | C | T | G | A | C | C | G | G | G | -                  | 1.54% (1105 reads) |                      |                    |                   |
| C       | T | G | C | T | C | C | C | T | G | T | C | T | G | - | - | - | - | - | - | - | A | C | T | G | C | T | G | A | C | C | C | T | G | A | C | C | G | G | G                  | -                  | 1.21% (867 reads)    |                    |                   |
| C       | T | G | C | T | C | C | C | T | G | T | C | T | G | C | C | G | A | T | G | - | - | C | T | G | C | T | G | A | C | C | C | T | G | A | C | C | G | G | G                  | -                  | 1.06% (758 reads)    |                    |                   |
| C       | T | G | C | T | C | C | C | T | G | T | C | T | G | C | C | G | T | C | T | G | A | C | T | G | C | T | G | A | C | C | C | T | G | A | C | C | G | G | G                  | -                  | 1.06% (757 reads)    |                    |                   |
| C       | T | G | C | T | C | C | C | - | G | A | C | T | G | C | T | G | A | C | C | T | G | C | T | C | C | C | G | A | C | T | G | C | T | G | A | C | C | C | T                  | -                  | 0.80% (571 reads)    |                    |                   |
| C       | T | G | C | T | C | C | C | T | G | T | C | T | G | - | - | - | - | - | - | - | - | - | - | - | - | - | A | C | C | C | T | G | A | C | C | G | G | G | -                  | 0.70% (498 reads)  |                      |                    |                   |
| C       | T | G | C | T | C | C | C | T | G | T | C | T | G | C | C | G | A | T | G | - | - | - | - | - | - | - | - | - | - | - | - | - | - | - | - | - | - | - | -                  | 0.65% (462 reads)  |                      |                    |                   |
| C       | - | - | - | - | - | - | - | - | - | - | - | - | - | - | - | - | - | - | - | - | - | - | - | C | T | G | A | C | C | C | T | G | A | C | C | G | G | G | -                  | 0.61% (439 reads)  |                      |                    |                   |
| C       | T | G | C | T | C | C | C | T | G | T | C | T | G | C | C | G | A | T | G | A | C | A | C | G | A | C | T | G | C | T | G | A | C | C | C | T | G | A | C                  | -                  | 0.55% (391 reads)    |                    |                   |
| C       | T | G | C | T | C | C | C | T | G | T | C | T | G | C | C | G | A | - | - | - | - | - | - | - | - | - | - | - | - | - | - | - | - | - | - | - | - | - | -                  | 0.52% (373 reads)  |                      |                    |                   |
| T       | G | C | T | C | C | C | T | G | T | C | T | G | C | T | C | C | C | T | G | T | C | T | G | C | C | G | A | C | T | G | C | T | G | A | C | C | C | T | G                  | -                  | 0.52% (369 reads)    |                    |                   |
| C       | T | G | C | T | C | C | C | A | G | - | - | - | - | - | - | - | - | - | - | - | A | C | T | G | C | T | G | A | C | C | C | T | G | A | C | C | G | G | G                  | -                  | 0.50% (359 reads)    |                    |                   |
| C       | T | G | C | T | C | C | C | T | G | T | C | T | G | C | C | G | A | T | G | - | - | - | - | - | - | - | - | - | - | - | - | - | A | C | C | G | G | G | -                  | 0.44% (318 reads)  |                      |                    |                   |
| C       | T | G | C | T | C | C | C | T | G | T | C | T | G | C | C | T | - | - | - | G | A | C | T | G | C | T | G | A | C | C | C | T | G | A | C | C | G | G | G                  | -                  | 0.40% (287 reads)    |                    |                   |
| C       | T | G | A | C | C | C | - | - | - | - | - | - | - | - | - | - | - | - | - | - | - | - | - | - | T | G | A | C | C | C | T | G | A | C | C | G | G | G | -                  | 0.40% (286 reads)  |                      |                    |                   |
| C       | T | G | C | T | C | C | C | T | G | T | C | T | G | C | C | G | A | T | G | A | A | C | T | G | C | T | G | A | C | C | C | T | G | A | C | C | G | G | G                  | -                  | 0.39% (276 reads)    |                    |                   |
| C       | T | G | C | T | - | - | - | - | - | - | - | - | - | - | - | - | - | - | - | - | - | - | - | G | C | T | G | A | C | C | C | T | G | A | C | C | G | G | G                  | -                  | 0.35% (248 reads)    |                    |                   |
| -       | - | - | - | - | - | - | - | - | - | - | - | - | - | - | - | - | - | - | - | - | - | - | T | G | C | T | G | A | C | C | C | T | G | A | C | C | G | G | G                  | -                  | 0.34% (244 reads)    |                    |                   |
| C       | T | G | C | T | C | C | C | T | G | T | C | T | G | C | C | G | A | T | G | G | C | A | G | A | C | A | G | G | G | A | G | C | A | G | C | A | G | T | C                  | -                  | 0.34% (243 reads)    |                    |                   |
| C       | T | G | C | T | C | C | C | T | G | T | C | T | G | C | C | - | - | - | - | - | - | - | T | G | C | T | G | A | C | C | C | T | G | A | C | C | G | G | G                  | -                  | 0.33% (238 reads)    |                    |                   |
| C       | T | G | C | T | C | C | C | T | G | T | C | T | G | C | C | C | T | - | - | G | A | C | T | G | C | T | G | A | C | C | C | T | G | A | C | C | G | G | G                  | -                  | 0.32% (229 reads)    |                    |                   |
| -       | - | - | - | - | - | - | - | - | - | - | C | A | G | T | G | G | A | G | G | G | - | - | - | - | - | - | - | - | - | - | - | G | A | C | C | G | G | G | -                  | 0.31% (222 reads)  |                      |                    |                   |
| C       | T | G | C | T | C | C | C | T | G | C | C | T | G | C | C | - | - | - | - | - | - | C | T | G | T | C | T | G | A | C | C | C | T | G | A | C | C | G | G                  | -                  | 0.31% (221 reads)    |                    |                   |
| C       | T | G | C | T | C | C | C | T | G | T | C | T | G | C | C | G | A | T | G | - | A | T | T | G | C | T | G | A | C | C | C | T | G | A | C | C | G | G | G                  | -                  | 0.29% (209 reads)    |                    |                   |
| C       | T | G | C | T | C | C | C | T | G | T | C | T | G | C | T | C | C | - | - | - | - | C | T | G | C | T | G | A | C | C | C | T | G | A | C | C | G | G | G                  | -                  | 0.29% (205 reads)    |                    |                   |
| C       | T | G | C | T | C | C | C | A | G | T | C | T | G | C | - | - | - | - | - | - | - | - | - | - | - | T | G | A | C | C | C | T | G | A | C | C | G | G | G                  | -                  | 0.27% (191 reads)    |                    |                   |
| C       | T | G | C | T | C | C | C | T | G | T | C | T | G | C | C | G | A | C | T | G | C | T | G | A | C | T | G | A | C | C | C | T | G | A | C | C | T | G | A                  | C                  | C                    | -                  | 0.25% (179 reads) |
| C       | T | G | C | T | C | C | C | T | G | T | C | T | G | C | C | - | - | T | G | C | T | C | C | C | T | G | T | C | T | G | C | T | G | A | C | C | C | T | G                  | -                  | 0.25% (176 reads)    |                    |                   |
| C       | T | G | C | T | C | C | C | T | G | T | C | T | G | C | C | G | A | C | A | G | G | G | A | G | C | A | G | G | T | G | T | T | C | C | C | T | G | T | C                  | -                  | 0.24% (175 reads)    |                    |                   |
| -       | - | - | - | - | - | - | - | - | - | - | - | - | - | - | - | - | - | - | - | - | - | - | - | - | - | - | A | C | C | C | T | G | A | C | C | G | G | G | -                  | 0.24% (173 reads)  |                      |                    |                   |
| C       | T | G | C | T | C | C | C | T | G | T | C | T | G | T | G | T | A | - | - | G | A | C | T | G | C | T | G | A | C | C | C | T | G | A | C | C | G | G | G                  | -                  |                      |                    |                   |

**bold** Substitutions

Insertions

- Deletions

----- Predicted cleavage position

|                                                                                     |                       |
|-------------------------------------------------------------------------------------|-----------------------|
| C T G C T C C C T G T C T G C C G A - - - - C T G C T G A C C C T G A C C G G G     | -19.98% (15322 reads) |
| C T G C T C C C T G T C T G C C G A T G G A C T G C T G A C C C T G A C C G G G     | -17.04% (13063 reads) |
| C T G C T C C C T G T C T G C C G A T G - - - - - C T G A C C C T G A C C G G G     | -9.81% (7518 reads)   |
| C T G C T C C C T G T C T G C C G A T G - A C T G C T G A C C C T G A C C G G G     | -4.17% (3198 reads)   |
| C T G C T C C C T G T C T G C - - - - - - - T G A C C C T G A C C G G G             | -4.07% (3122 reads)   |
| C T G C T C C C T G T C T G C C - - - - - - - - - - - - - - - - -                   | -1.91% (1465 reads)   |
| C T G C T C C C T G T C T G C C G A T G - - C T G C T G A C C C T G A C C G G G     | -1.82% (1397 reads)   |
| C T G C T C C C T G T C T G - - - - - - - - - - - - - A C C G G G                   | -1.82% (1395 reads)   |
| C T G C T C C C T G T C T G C C G A T G - - - - - - - A C C C T G A C C G G G       | -1.58% (1213 reads)   |
| C T G C T C C C T G T C T G C C G A - - - - - - - - - - - - - - - -                 | -1.51% (1160 reads)   |
| C T G C T C C C T G T C T G C C G A - - - - - - - - C C C T G A C C G G G           | -1.46% (1122 reads)   |
| C T G C T C C C T G - - - - - - - - - A C T G C T G A C C C T G A C C G G G         | -1.37% (1054 reads)   |
| C T G C T C C C T G T C T G C C G A T G A C T G C T G A C C C T G A C C C T G       | -1.22% (936 reads)    |
| C T G C T C C C T G T C T G C C G A T G C T G A C T G C T G A C C C T G A C C G     | -1.14% (872 reads)    |
| C T G C T C C C T G T C T G C C G A T G C C G A C T G C T G A C C C T G A C C G     | -0.95% (728 reads)    |
| C T G C T C C C T G T C T G C C G A T G - T C T G C T G A C C C T G A C C G G G     | -0.86% (661 reads)    |
| C T G C T C C C T G - - - - - - - - - C T G A C C C T G A C C G G G                 | -0.84% (644 reads)    |
| C T G C T C C C T G T C T G - - - - - - - A C C C T G A C C G G G                   | -0.82% (627 reads)    |
| C T G C T C C C T G T C T G C C G A C T G A C T G C T G A C C C T G A C C G G G     | -0.77% (589 reads)    |
| C T G C T C C C T G T C T G C C G A T G A C C - - C T G A C C C T G A C C G G G     | -0.62% (473 reads)    |
| C T G C T C C C T G T C T G C C G A T G A C A G C T G C T G A C C T G A C C         | -0.55% (425 reads)    |
| C T G C T C C C T G T C T G C C G A T G T C T G C G A C T G C T G A C C C T G A     | -0.54% (414 reads)    |
| C T G C T C C C T G T C T G C C G A T G - - - - - - - - - - - - - - - -             | -0.48% (370 reads)    |
| C T G C T C C C T G T C T G C C G A T G - - - - - - - - - - - A C C G G G           | -0.47% (362 reads)    |
| C T G C T C C C T G T C T G C C G A T T - - - - - T T G A C C C T G A C C G G G     | -0.46% (355 reads)    |
| C T G C T C C C T G - C T C C C G A - - - - C T G C T G A C C C T G A C C G G G     | -0.45% (348 reads)    |
| C T G C T C A G G G T C - - - - - - - A C T G C T G A C C C T G A C C G G G         | -0.43% (331 reads)    |
| C T G C T C C C T G T C T G C C - - - - - - - T G C T G A C C C T G A C C G G G     | -0.41% (312 reads)    |
| C T G C T C C C T G T C T G C C G A T G - A C C G A T G A C C C T G A C C G G G     | -0.40% (306 reads)    |
| C T G C T C C C T G T C T G C C G A T G - A C - - C T G A C C C T G A C C G G G     | -0.40% (305 reads)    |
| G T C T G C C C T G T C T G C C G A T G G - - - G C T G A C C C T G A C C G G G     | -0.39% (296 reads)    |
| C T G C T C C C T G T C T G C C G A T G G T A A C T G C T G A C C C T G A C C G     | -0.35% (266 reads)    |
| C T G C T - - - - - - - - - - - - - - - G A C C C T G A C C G G G                   | -0.33% (250 reads)    |
| C T G C T C C C T G T C T G C C G A T G - - - - - - - A C C G T G A C C G G G       | -0.32% (247 reads)    |
| T G C T C C C T G T C T G G C A G A C A G G G A G C A G G - - - T G A C C G G G     | -0.31% (234 reads)    |
| C T G C T C C C T G T C T G C C G A C - - - C T G - - - - - T G A C C G G G         | -0.30% (227 reads)    |
| - - - - - - - - - - - - - - - - - - - - - - - - - - - - - -                         | -0.28% (212 reads)    |
| C T G C T C C C T G T C T G C C G A T G T C T G C T G A C T C C T G A C T G G C     | -0.27% (208 reads)    |
| C T G C T C C C T G T C T G C C G - - - - - - - - - - - - - - - -                   | -0.27% (207 reads)    |
| C T G C T C C C T G T C T G C A G A - - - C T G C T G A C C C T G A C C G G G       | -0.23% (175 reads)    |
| C T G C T C C C T G T C T G C C G A T G G A A T G T G G T C C C C T C T C A A A     | -0.22% (171 reads)    |
| C T G C T C C C T G T C T G C C G A T G A T C T G A C T G C T G A C C C T G A C     | -0.22% (168 reads)    |
| C T G C T C C C T G T C T G C C G A T G C T G T C T G T G T C T G C T G A C C C T G | -0.22% (168 reads)    |
| - - - - - - - - - - - - - - - - - - - T G C T G A C C C T G A C C G G G             | -0.22% (166 reads)    |
| - - - - - - - - - - - - - - - - - G A C T G C T G A C C C T G A C C G G G           | -0.21% (163 reads)    |
| C T G C T C C C T G T C T G C C G A T G C T G A C C C T G A C T G C T G A C C C     | -0.21% (159 reads)    |
| C T G C T C C C A - - C T G G C C T T - - - - - T G A C C C T G A C C G G G         | -0.21% (158 reads)    |
| C T G C T C C C T G T C T G C T - - - - - - - C C C T G T C - - - -                 | -0.20% (157 reads)    |
| C T G C T C C C T G T C T G C C G A T T G A C T G C T G A C C C T G A C C G G G     | -0.20% (154 reads)    |

**bold**

Substitutions

Insertions

-

Deletions

-----

Predicted cleavage position



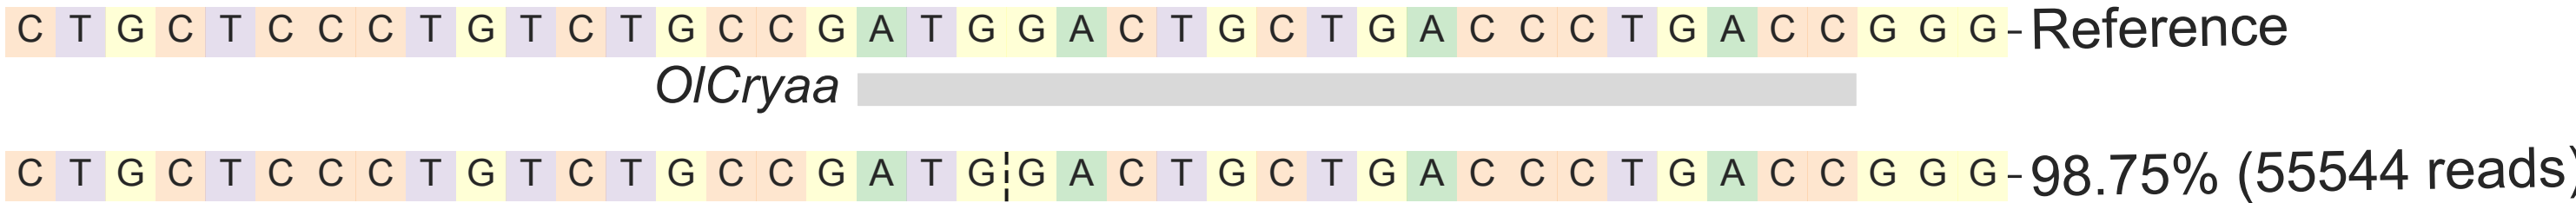

**bold** Substitutions

Insertions

- Deletions

----- Predicted cleavage position

uninjected pool1 *OlCryaa*

C T G C T C C C T G T C T G C C G A T G G A C T G C T G A C C C T G A C C G G G - Reference  
*OlCryaa* 

C T G C T C C C T G T C T G C C G A T G **G** A C T G C T G A C C C T G A C C G G G - 98.87% (50328 reads)

**bold** Substitutions

 Insertions

- Deletions

----- Predicted cleavage position

uninjected pool2 *OlCryaa*

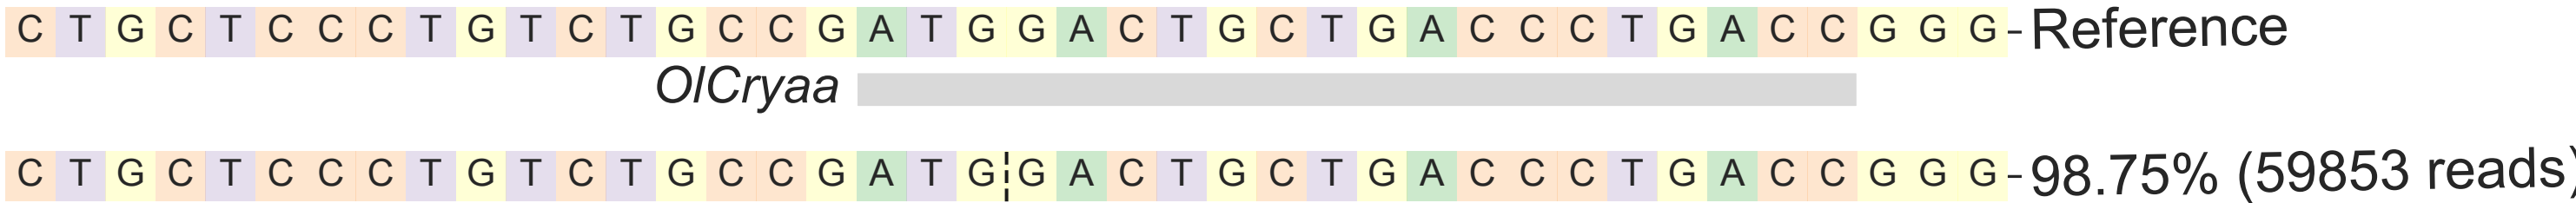

**bold** Substitutions

Insertions

- Deletions

----- Predicted cleavage position

uninjected pool3 *OlCryaa*

|   |   |   |   |   |   |   |   |   |   |   |   |   |   |   |   |   |   |   |   |   |   |   |   |   |   |   |   |   |   |   |   |   |   |   |   |   |   |   |   |                    |                     |                    |
|---|---|---|---|---|---|---|---|---|---|---|---|---|---|---|---|---|---|---|---|---|---|---|---|---|---|---|---|---|---|---|---|---|---|---|---|---|---|---|---|--------------------|---------------------|--------------------|
| A | T | T | T | C | T | G | T | T | G | T | C | C | C | C | T | G | C | C | T | - | - | - | - | C | T | T | T | G | C | G | C | G | C | T | C | T | G | C | T | -                  | 10.87% (6287 reads) |                    |
| A | T | T | T | C | T | G | T | T | G | T | C | C | C | C | T | G | C | C | T | G | G | T | - | C | T | T | T | G | C | G | C | G | C | T | C | T | G | C | T | -                  | 7.02% (4059 reads)  |                    |
| A | T | T | T | C | T | G | T | T | G | T | C | C | C | C | T | G | C | C | T | - | - | - | - | - | - | T | T | G | C | G | C | G | C | T | C | T | G | C | T | -                  | 6.05% (3502 reads)  |                    |
| A | T | T | T | C | T | G | T | T | G | T | C | C | C | C | T | G | C | C | T | G | G | T | T | T | C | T | T | T | G | C | G | C | G | C | T | C | T | G | C | T                  | -                   | 4.22% (2440 reads) |
| A | T | T | T | C | T | G | T | T | G | T | C | C | C | C | T | G | C | C | T | G | - | - | T | C | T | T | T | G | C | G | C | G | C | T | C | T | G | C | T | -                  | 3.20% (1853 reads)  |                    |
| A | T | T | T | C | T | G | T | T | G | T | C | C | C | C | T | G | C | C | T | G | C | C | T | C | T | T | T | G | C | G | C | G | C | T | C | T | G | C | T | -                  | 2.90% (1679 reads)  |                    |
| A | T | T | T | C | T | G | T | T | G | T | C | C | C | C | T | G | C | C | T | - | - | - | - | - | - | - | - | - | - | - | - | - | - | - | - | - | - | - | - | 2.81% (1626 reads) |                     |                    |
| A | T | T | T | C | T | G | T | T | G | T | C | C | C | C | T | G | C | - | - | - | - | - | - | - | - | - | - | - | G | C | G | C | T | C | T | G | C | T | - | 2.79% (1616 reads) |                     |                    |
| A | T | T | T | C | T | G | T | T | G | T | C | C | C | C | T | G | C | C | T | G | G | T | T | - | - | - | - | G | C | G | C | G | C | T | C | T | G | C | T | -                  | 2.41% (1397 reads)  |                    |
| A | T | T | T | C | T | G | T | T | G | T | - | - | - | - | - | - | - | - | - | - | - | - | - | - | - | - | - | - | G | C | G | C | T | C | T | G | C | T | - | 2.21% (1277 reads) |                     |                    |
| A | T | T | T | C | T | G | T | T | G | T | C | C | C | C | T | G | C | C | T | G | G | T | - | - | - | - | - | G | C | G | C | G | C | T | C | T | G | C | T | -                  | 2.15% (1244 reads)  |                    |
| A | T | T | T | C | T | G | T | T | G | T | C | C | C | C | T | G | C | C | T | G | C | - | - | C | T | T | T | G | C | G | C | G | C | T | C | T | G | C | T | -                  | 1.86% (1078 reads)  |                    |
| A | T | T | T | C | T | G | T | T | G | T | C | C | C | C | T | G | C | - | - | - | - | - | - | - | - | - | - | - | - | - | G | C | T | C | T | G | C | T | - | 1.85% (1071 reads) |                     |                    |
| A | T | T | T | C | T | G | T | T | G | T | C | C | C | C | T | G | C | C | T | G | G | T | T | C | T | T | T | G | C | G | C | G | C | T | C | T | G | C | T | -                  | 1.84% (1062 reads)  |                    |
| A | T | T | T | C | T | G | T | T | G | T | C | C | C | C | T | G | C | C | T | G | G | G | G | C | T | C | T | G | C | T | G | C | C | T | G | C | G | C | G | -                  | 1.84% (1062 reads)  |                    |
| A | T | T | T | C | T | G | T | T | G | T | C | C | C | C | T | - | - | - | - | - | - | - | - | - | - | T | T | G | C | G | C | G | C | T | C | T | G | C | T | -                  | 1.69% (979 reads)   |                    |
| A | T | T | T | C | T | G | T | T | G | T | C | C | C | C | T | G | C | C | T | G | G | T | T | G | T | C | - | - | - | - | - | - | - | - | - | - | - | C | C | -                  | 1.44% (835 reads)   |                    |
| A | T | T | T | C | T | T | C | - | - | - | - | - | - | - | - | - | - | - | - | - | - | - | T | C | T | T | T | G | C | G | C | G | C | T | C | T | G | C | T | -                  | 1.43% (830 reads)   |                    |
| A | T | T | T | C | T | G | T | T | G | T | C | C | C | C | T | G | C | C | T | - | - | - | - | - | - | - | - | G | C | G | C | G | C | T | C | T | G | C | T | -                  | 1.42% (823 reads)   |                    |
| A | T | T | T | C | T | G | T | T | G | T | C | C | C | C | T | G | C | C | T | G | G | G | A | C | A | A | C | A | G | A | A | A | T | T | T | G | C | G | C | -                  | 1.40% (811 reads)   |                    |
| A | T | T | T | C | T | G | T | T | G | T | C | C | C | C | T | G | T | C | T | G | T | C | T | C | C | C | C | T | G | C | C | C | T | G | C | C | T | C | T | -                  | 1.40% (808 reads)   |                    |
| A | T | T | T | C | T | G | T | T | G | T | C | C | C | C | T | G | C | C | T | G | G | T | T | C | T | T | C | T | T | T | G | C | G | C | G | C | T | C | T | -                  | 1.24% (716 reads)   |                    |
| A | T | T | T | C | T | G | T | T | G | T | C | C | C | C | T | G | C | C | T | G | G | T | T | - | - | - | T | G | C | G | C | G | C | T | C | T | G | C | T | -                  | 1.12% (647 reads)   |                    |
| A | T | T | T | C | T | G | T | T | G | T | C | C | C | C | T | G | C | C | C | - | - | - | C | C | T | T | T | G | C | G | C | G | C | T | C | T | G | C | T | -                  | 1.09% (628 reads)   |                    |
| A | T | T | T | C | T | G | T | T | G | T | C | C | C | C | T | G | C | C | T | G | G | T | T | T | A | G | A | G | T | A | G | C | G | C | C | T | C | T | - | 0.95% (552 reads)  |                     |                    |
| A | T | T | T | C | T | G | T | T | G | T | C | C | C | C | T | G | C | C | T | G | G | T | A | T | C | T | T | T | G | C | G | C | G | C | T | C | T | G | C | -                  | 0.92% (533 reads)   |                    |
| A | T | T | T | C | T | G | T | T | G | T | C | C | C | C | T | G | C | C | T | G | G | T | G | G | G | G | T | C | T | T | T | G | C | G | C | G | C | T | C | -                  | 0.92% (531 reads)   |                    |
| A | T | T | T | C | T | G | T | T | G | T | C | C | C | C | T | G | C | - | - | - | - | - | T | C | T | T | T | G | C | G | C | G | C | T | C | T | G | C | T | -                  | 0.91% (526 reads)   |                    |
| A | T | T | T | C | T | G | T | T | G | T | C | C | C | C | T | G | C | C | C | - | - | - | T | C | T | T | T | G | C | G | C | G | C | T | C | T | G | C | T | -                  | 0.87% (505 reads)   |                    |
| A | T | T | T | C | T | G | T | T | G | T | C | C | C | C | T | G | C | C | T | G | G | T | A | A | G | - | - | G | C | G | C | G | C | T | C | T | G | C | T | -                  | 0.85% (491 reads)   |                    |
| - | - | - | T | C | T | G | C | T | C | T | C | - | - | - | - | - | - | - | - | - | - | - | - | - | - | - | - | - | G | C | G | C | T | C | T | G | C | T | - | 0.78% (454 reads)  |                     |                    |
| A | T | T | T | C | T | G | T | T | G | T | C | C | C | C | T | G | C | C | T | G | A | - | - | C | T | T | T | G | C | G | C | G | C | T | C | T | G | C | T | -                  | 0.75% (434 reads)   |                    |
| A | T | T | T | C | T | G | T | T | G | T | C | C | C | C | T | G | C | C | T | G | G | G | G | A | C | A | A | C | A | G | A | A | A | T | T | C | C | T | G | -                  | 0.72% (419 reads)   |                    |
| A | T | T | T | C | T | G | T | T | G | T | C | C | C | C | T | G | C | C | T | G | G | T | T | C | T | - | - | - | - | - | - | - | - | - | - | - | - | - | - | -                  | 0.70% (407 reads)   |                    |
| A | T | T | T | C | T | G | T | T | G | T | C | C | C | C | T | G | C | C | T | G | G | T | C | T | C | C | C | C | T | G | T | C | T | T | T | G | C | G | C | -                  | 0.63% (366 reads)   |                    |
| A | T | T | T | C | T | G | T | T | G | T | C | C | C | C | T | G | C | C | T | G | G | A | G | G | T | C | C | C | C | T | G | C | C | T | G | C | C | T | C | -                  | 0.63% (362 reads)   |                    |
| A | T | T | T | C | T | G | T | T | G | T | C | C | C | C | T | G | C | C | T | G | G | T | T | - | - | T | T | G | C | G | C | G | C | T | C | T | G | C | T | -                  | 0.59% (342 reads)   |                    |
| A | T | T | T | C | T | G | T | T | G | T | C | C | C | C | T | G | C | C | T | G | G | T | G | C | C | T | T | T | G | C | G | C | G | C | T | C | T | G | C | -                  | 0.56% (323 reads)   |                    |
| A | T | T | T | C |   |   |   |   |   |   |   |   |   |   |   |   |   |   |   |   |   |   |   |   |   |   |   |   |   |   |   |   |   |   |   |   |   |   |   |                    |                     |                    |

**bold**

Substitutions

Insertions

-

Deletions

-----

Predicted cleavage position

|   |   |   |   |   |   |   |   |   |   |   |   |   |   |   |   |   |   |   |   |   |   |   |   |   |   |   |   |   |   |   |   |   |   |   |   |   |   |   |   |                    |                    |                    |                   |
|---|---|---|---|---|---|---|---|---|---|---|---|---|---|---|---|---|---|---|---|---|---|---|---|---|---|---|---|---|---|---|---|---|---|---|---|---|---|---|---|--------------------|--------------------|--------------------|-------------------|
| A | T | T | T | C | T | G | T | T | G | T | C | C | C | C | T | G | C | C | T | - | - | - | - | C | T | T | T | G | C | G | C | G | C | T | C | T | G | C | T | -                  | 9.95% (5878 reads) |                    |                   |
| A | T | T | T | C | T | G | T | T | G | T | C | C | C | C | T | G | C | C | T | - | - | - | - | - | - | T | T | G | C | G | C | G | C | T | C | T | G | C | T | -                  | 8.93% (5278 reads) |                    |                   |
| A | T | T | T | C | T | G | T | T | G | T | C | C | C | C | T | G | C | C | T | G | G | T | T | C | T | T | T | G | C | G | C | G | C | T | C | T | G | C | T | -                  | 8.50% (5025 reads) |                    |                   |
| A | T | T | T | C | T | G | T | T | G | T | C | C | C | C | T | G | C | C | T | G | G | T | - | C | T | T | T | G | C | G | C | G | C | T | C | T | G | C | T | -                  | 5.55% (3279 reads) |                    |                   |
| A | T | T | T | C | T | G | T | T | G | T | C | C | C | C | T | G | C | C | T | G | G | T | T | - | - | - | T | G | C | G | C | G | C | T | C | T | G | C | T | -                  | 4.61% (2724 reads) |                    |                   |
| A | T | T | T | C | T | G | T | T | G | T | C | C | C | C | T | G | C | C | T | G | G | T | T | T | C | T | T | T | G | C | G | C | G | C | T | C | T | G | C | T                  | -                  | 2.74% (1620 reads) |                   |
| A | T | T | T | C | T | G | T | T | G | T | C | C | C | C | T | G | C | C | T | G | G | T | - | - | - | - | - | - | G | C | G | C | G | C | T | C | T | G | C | T                  | -                  | 2.67% (1578 reads) |                   |
| A | T | T | T | C | T | G | T | T | G | T | C | C | C | C | T | G | C | C | T | - | - | - | - | - | - | - | - | G | C | G | C | G | C | T | C | T | G | C | T | -                  | 2.57% (1518 reads) |                    |                   |
| A | T | T | T | C | T | G | T | T | G | T | C | C | C | C | T | G | C | C | T | G | G | - | - | - | - | - | - | G | C | G | C | G | C | T | C | T | G | C | T | -                  | 2.13% (1256 reads) |                    |                   |
| A | T | T | T | C | T | G | T | T | G | T | C | C | C | C | T | G | C | C | T | G | G | T | C | T | T | T | G | C | C | T | C | T | G | T | C | T | T | T | G | -                  | 2.08% (1229 reads) |                    |                   |
| A | T | T | T | C | T | G | T | T | G | T | C | C | C | C | T | G | C | C | T | G | G | T | C | C | C | C | T | C | T | T | T | G | C | G | C | T | C | - | - | -                  | 2.00% (1181 reads) |                    |                   |
| A | T | T | T | C | T | G | T | T | G | T | C | C | C | C | T | G | C | C | T | - | - | - | - | - | - | - | - | - | G | C | G | C | T | C | T | G | C | T | - | 1.77% (1043 reads) |                    |                    |                   |
| A | T | T | T | C | T | G | T | T | G | T | C | C | C | C | T | G | C | C | T | G | C | C | T | C | T | T | T | G | C | G | C | G | C | T | C | T | G | C | T | -                  | 1.75% (1032 reads) |                    |                   |
| A | T | T | T | C | T | G | T | T | G | T | C | C | C | C | T | C | - | - | - | - | - | - | - | - | - | - | - | - | G | C | G | C | G | C | T | C | T | G | C | T                  | -                  | 1.68% (993 reads)  |                   |
| A | T | T | T | C | T | G | T | T | G | T | C | C | C | C | T | G | C | C | T | G | G | - | - | - | - | - | - | G | C | G | C | G | C | T | C | T | G | C | T | -                  | 1.52% (896 reads)  |                    |                   |
| A | T | T | T | C | T | G | T | T | G | T | C | C | C | C | T | G | C | - | - | - | - | - | - | - | - | - | - | - | G | C | G | C | T | C | T | G | C | T | - | 1.46% (863 reads)  |                    |                    |                   |
| A | T | T | T | C | T | G | T | T | G | T | C | C | C | C | T | G | C | C | T | G | - | - | - | C | T | T | T | G | C | G | C | G | C | T | C | T | G | C | T | -                  | 1.41% (835 reads)  |                    |                   |
| A | T | T | T | C | T | G | T | T | G | T | C | C | C | C | T | G | C | C | T | G | G | G | A | C | T | T | T | G | C | G | C | G | C | T | C | T | G | C | T | -                  | 1.38% (813 reads)  |                    |                   |
| A | T | T | T | C | T | G | T | T | G | T | C | C | C | C | T | G | C | C | T | G | C | C | C | C | C | C | T | C | T | T | T | G | C | G | C | G | C | - | - | -                  | 1.37% (809 reads)  |                    |                   |
| T | G | T | T | G | T | C | C | C | C | T | G | C | C | C | T | G | C | C | C | T | G | C | C | T | C | T | T | T | G | C | G | C | G | C | T | C | T | G | C | T                  | -                  | 1.36% (805 reads)  |                   |
| A | T | T | T | C | T | G | T | T | G | T | C | C | C | C | - | - | - | - | - | - | - | - | - | C | T | T | T | G | C | G | C | G | C | T | C | T | G | C | T | -                  | 1.32% (780 reads)  |                    |                   |
| A | T | T | T | C | T | G | T | T | G | T | C | C | C | C | T | G | C | C | - | - | - | - | - | - | - | - | - | - | - | - | - | - | - | - | - | - | - | - | - | 1.29% (760 reads)  |                    |                    |                   |
| A | T | T | T | C | T | G | T | T | G | T | C | C | C | C | T | G | C | C | T | G | G | T | - | - | - | - | - | - | - | - | - | - | - | - | - | - | - | - | - | -                  | 1.28% (759 reads)  |                    |                   |
| A | T | T | T | C | T | G | T | T | G | T | C | C | C | C | T | G | C | C | T | G | G | T | C | T | T | T | T | T | C | T | T | G | C | C | T | T | T | T | - | -                  | 1.21% (715 reads)  |                    |                   |
| A | T | T | T | C | T | G | T | T | G | T | C | C | C | C | T | - | - | - | - | - | - | - | - | - | T | T | G | C | G | C | G | C | T | C | T | G | C | T | - | -                  | 1.13% (665 reads)  |                    |                   |
| A | T | T | T | C | T | G | T | T | G | T | C | C | C | C | T | G | C | C | T | - | - | - | T | C | T | T | T | G | C | G | C | G | C | T | C | T | G | C | T | -                  | 1.05% (621 reads)  |                    |                   |
| A | T | T | T | C | T | G | T | T | G | T | C | C | C | C | T | G | C | C | A | - | - | - | - | - | - | - | - | - | T | G | C | G | C | T | C | T | G | C | T | -                  | 1.00% (593 reads)  |                    |                   |
| A | T | T | T | C | T | G | T | T | G | T | C | C | C | C | T | G | C | T | G | T | C | G | T | C | C | C | T | G | C | G | C | A | A | T | A | A | T | A | T | T                  | G                  | -                  | 0.97% (571 reads) |
| - | - | - | - | - | - | - | - | - | - | - | - | - | - | - | - | - | - | - | - | - | - | - | - | - | - | T | T | T | G | C | G | C | G | C | T | C | T | G | C | T                  | -                  | 0.92% (541 reads)  |                   |
| A | T | T | T | C | T | G | T | T | G | T | C | C | C | C | T | G | C | C | T | - | G | C | T | C | T | T | T | G | C | G | C | G | C | T | C | T | G | C | T | -                  | 0.81% (479 reads)  |                    |                   |
| A | T | T | T | C | T | G | T | T | G | T | C | C | C | C | T | G | C | G | - | G | C | C | T | C | T | T | T | G | C | G | C | G | C | T | C | T | G | C | T | -                  | 0.76% (451 reads)  |                    |                   |
| A | T | T | T | C | T | G | T | T | G | T | C | C | C | C | T | G | - | - | - | - | - | - | T | C | T | T | T | G | C | G | C | G | C | T | C | T | G | C | T | -                  | 0.74% (438 reads)  |                    |                   |
| - | - | - | T | C | T | G | - | - | - | - | C | G | C | C | T | G | C | C | T | - | - | C | T | C | T | T | T | G | C | G | C | G | C | T | C | T | G | C | T | -                  | 0.71% (421 reads)  |                    |                   |
| A | T | T | T | C | T | G | T | T | G | T | A | C | C | C | C | T | G | C | C | T | G | G | T | - | C | T | T | T | G | C | G | C | G | C | T | C | T | G | C | T                  | -                  | 0.63% (375 reads)  |                   |
| A | T | T | T | C | T | G | T | T | G | T | C | C | C | C | T | C | C | C | - | - | - | - | - | C | T | T | T | G | C | G | C | G | C | T | C | T | G | C | T | -                  | 0.55% (323 reads)  |                    |                   |
| - | - | - | - | - | - | - | - | - | - | - | - | - | - | - | - | - | - | - | - | - | - | - | - | C | T | T | T | G | C | G | C | G | C | T | C | T | G | C | T | -                  | 0.47% (277 reads)  |                    |                   |
| A | T | T | T | C | T | G | T | T | G | T | C | C | C | C | T | G | C | C | T | G | G | T | C | A | C | A | C | C | C | T | G | C | - | - | - | C | T | G | C | T                  | -                  | 0.45% (268 reads)  |                   |
| A | T | T | T | C | T | G | T | T | G | T | C | C | C | - | - | - | - | - | T | G | T | T | G | T |   |   |   |   |   |   |   |   |   |   |   |   |   |   |   |                    |                    |                    |                   |

**bold**

Substitutions

Insertions

-

Deletions

-----

Predicted cleavage position

|   |   |   |   |   |   |   |   |   |   |   |   |   |   |   |   |   |   |   |   |   |   |   |   |   |   |   |   |   |   |   |   |   |   |   |   |   |   |   |       |             |              |              |             |
|---|---|---|---|---|---|---|---|---|---|---|---|---|---|---|---|---|---|---|---|---|---|---|---|---|---|---|---|---|---|---|---|---|---|---|---|---|---|---|-------|-------------|--------------|--------------|-------------|
| A | T | T | T | C | T | G | T | T | G | T | C | C | C | C | T | G | C | C | T | - | - | - | - | C | T | T | T | G | C | G | C | G | C | T | C | T | G | C | T     | -           | 9.12%        | (5301 reads) |             |
| A | T | T | T | C | T | G | T | T | G | T | C | C | C | C | T | G | C | C | T | G | G | T | - | C | T | T | T | G | C | G | C | G | C | T | C | T | G | C | T     | -           | 8.35%        | (4854 reads) |             |
| A | T | T | T | C | T | G | T | T | G | T | C | C | C | C | T | G | C | C | T | - | - | - | - | - | - | T | T | G | C | G | C | G | C | T | C | T | G | C | T     | -           | 7.63%        | (4433 reads) |             |
| A | T | T | T | C | T | G | T | T | G | T | C | C | C | C | T | G | C | C | T | G | C | - | - | C | T | T | T | G | C | G | C | G | C | T | C | T | G | C | T     | -           | 4.65%        | (2703 reads) |             |
| A | T | T | T | C | T | G | T | T | G | T | C | C | C | C | T | G | C | C | T | G | G | T | T | - | - | - | T | G | C | G | C | G | C | T | C | T | G | C | T     | -           | 4.55%        | (2644 reads) |             |
| A | T | T | T | C | T | G | T | T | G | T | C | C | C | C | T | G | C | C | - | - | - | - | - | - | - | - | - | - | - | - | - | - | - | - | - | - | - | - | -     | 4.11%       | (2386 reads) |              |             |
| A | T | T | T | C | T | G | T | T | G | T | C | C | C | C | T | G | C | C | T | - | - | - | - | - | - | - | T | G | C | G | C | G | C | T | C | T | G | C | T     | -           | 3.21%        | (1867 reads) |             |
| - | - | - | - | - | - | - | - | - | - | - | - | - | - | - | - | - | - | - | - | - | - | - | C | T | T | T | G | C | G | C | G | C | T | C | T | G | C | T | -     | 3.04%       | (1767 reads) |              |             |
| A | T | T | T | C | T | G | T | T | G | T | C | C | C | C | T | G | C | C | T | G | G | T | G | T | C | T | T | T | G | C | G | C | G | C | T | C | T | G | C     | -           | 2.90%        | (1684 reads) |             |
| A | T | T | T | C | - | G | T | T | G | - | - | - | - | - | - | - | - | - | - | - | - | - | - | - | - | - | - | - | - | - | - | - | - | - | - | - | - | - | -     | 2.84%       | (1653 reads) |              |             |
| A | T | T | T | C | T | G | T | T | G | T | C | C | C | C | T | G | C | C | T | G | G | T | - | - | - | - | - | - | - | - | - | - | - | - | - | - | - | - | -     | -           | 2.57%        | (1492 reads) |             |
| A | T | T | T | C | T | G | T | T | G | T | C | C | C | C | T | G | C | - | - | - | - | - | - | - | - | - | - | - | G | C | G | C | T | C | T | G | C | T | -     | 2.44%       | (1418 reads) |              |             |
| A | T | T | T | C | T | G | T | T | G | T | C | C | C | C | T | G | C | C | T | - | - | - | - | - | - | - | - | - | G | C | G | C | T | C | T | G | C | T | -     | 1.98%       | (1149 reads) |              |             |
| A | T | T | T | C | T | G | T | T | G | T | C | C | C | C | T | G | C | C | T | G | G | T | T | C | T | T | T | G | C | G | C | G | C | T | C | T | G | C | T     | -           | 1.77%        | (1031 reads) |             |
| A | T | T | T | C | T | G | T | T | G | T | C | C | C | C | T | G | C | C | T | - | - | - | - | - | - | - | - | - | G | C | G | C | G | C | T | C | T | G | C     | T           | -            | 1.45%        | (845 reads) |
| A | T | T | T | C | T | G | T | T | G | T | C | C | C | C | T | G | C | C | C | - | - | - | T | C | T | T | T | G | C | G | C | G | C | T | C | T | G | C | T     | -           | 1.11%        | (647 reads)  |             |
| A | T | T | T | C | T | G | T | T | G | T | C | C | C | C | T | G | C | C | A | G | - | - | - | C | T | T | T | G | C | G | C | G | C | T | C | T | G | C | T     | -           | 1.07%        | (622 reads)  |             |
| A | T | T | T | C | T | G | T | T | G | T | C | C | C | C | T | G | C | C | T | G | C | C | C | C | T | C | T | T | T | G | C | G | C | G | C | T | C | T | G     | C           | -            | 1.06%        | (616 reads) |
| - | - | - | - | - | - | - | - | - | - | - | - | - | - | - | - | - | - | - | - | - | - | - | - | - | - | - | - | - | G | C | G | C | T | C | T | G | C | T | -     | 1.05%       | (609 reads)  |              |             |
| A | T | T | T | C | T | G | T | T | G | T | C | C | C | C | T | G | C | C | T | G | C | C | T | C | T | T | T | G | C | G | C | G | C | T | C | T | G | C | T     | -           | 1.03%        | (600 reads)  |             |
| A | T | T | T | C | T | G | T | T | G | T | C | C | C | C | T | G | C | C | T | G | C | C | C | C | T | C | T | T | T | G | C | G | C | G | C | T | C | T | G     | -           | 0.93%        | (543 reads)  |             |
| A | T | T | T | C | T | G | T | T | G | T | C | C | C | C | T | G | C | C | T | G | G | G | T | C | T | T | T | G | C | G | C | G | C | T | C | T | G | C | T     | -           | 0.90%        | (525 reads)  |             |
| A | T | T | T | C | T | G | T | T | G | T | C | C | C | C | - | - | - | - | - | - | - | - | - | - | - | - | - | - | - | - | - | - | - | - | - | - | - | - | -     | 0.90%       | (524 reads)  |              |             |
| A | T | T | T | C | T | G | T | T | G | T | C | C | C | C | T | G | C | C | T | G | G | T | G | C | A | G | C | G | C | T | T | T | G | C | G | C | G | C | T     | -           | 0.87%        | (504 reads)  |             |
| A | T | T | T | C | T | G | T | T | G | T | C | C | C | C | T | G | C | C | T | G | G | T | C | C | C | T | A | C | T | T | T | G | C | G | C | G | C | T | C     | -           | 0.86%        | (500 reads)  |             |
| A | T | T | T | C | T | G | T | T | G | T | C | C | C | C | - | - | - | C | T | - | - | - | - | - | - | - | - | - | - | G | C | T | C | T | G | C | T | - | 0.81% | (472 reads) |              |              |             |
| A | T | T | T | C | T | G | T | T | G | T | C | C | C | C | T | - | - | - | - | - | - | - | - | - | - | - | T | G | C | G | C | G | C | T | C | T | G | C | T     | -           | 0.73%        | (425 reads)  |             |
| A | T | T | T | C | T | G | T | G | G | T | C | C | C | C | T | G | C | C | T | G | C | C | T | C | T | T | T | G | C | G | C | G | C | T | C | T | G | C | T     | -           | 0.71%        | (415 reads)  |             |
| A | T | T | T | C | T | G | T | T | G | T | C | C | C | C | T | G | - | - | - | - | - | - | T | C | T | T | T | G | C | G | C | G | C | T | C | T | G | C | T     | -           | 0.69%        | (402 reads)  |             |
| A | T | T | T | C | T | G | T | T | G | T | C | C | C | C | T | G | C | C | T | G | G | T | T | A | G | G | G | T | T | A | G | G | G | T | T | A | T | G | C     | -           | 0.69%        | (402 reads)  |             |
| A | T | T | T | C | T | G | T | T | G | T | C | C | C | C | T | G | C | C | T | - | G | C | T | C | T | T | T | G | C | G | C | G | C | T | C | T | G | C | T     | -           | 0.69%        | (401 reads)  |             |
| A | T | T | T | C | T | G | T | T | G | T | C | C | C | C | - | G | C | C | T | - | - | - | - | - | - | T | T | G | C | G | C | G | C | T | C | T | G | C | T     | -           | 0.68%        | (396 reads)  |             |
| A | T | T | T | C | T | G | T | T | G | T | C | C | C | C | T | G | C | - | - | - | - | - | T | C | T | T | T | G | C | G | C | G | C | T | C | T | G | C | T     | -           | 0.66%        | (384 reads)  |             |
| A | T | T | T | C | T | G | T | T | G | T | C | C | C | C | T | G | C | C | T | G | - | - | T | C | T | T | T | G | C | G | C | G | C | T | C | T | G | C | T     | -           | 0.65%        | (380 reads)  |             |
| A | T | T | T | C | T | G | T | T | G | T | C | C |   |   |   |   |   |   |   |   |   |   |   |   |   |   |   |   |   |   |   |   |   |   |   |   |   |   |       |             |              |              |             |

**bold**

Substitutions

Insertions

-

Deletions

-----

Predicted cleavage position

|       |   |   |   |   |   |   |   |   |   |   |   |   |   |   |   |   |   |   |   |   |   |   |       |                 |     |   |   |   |   |   |   |   |   |   |   |   |                   |   |                   |                      |  |  |  |
|-------|---|---|---|---|---|---|---|---|---|---|---|---|---|---|---|---|---|---|---|---|---|---|-------|-----------------|-----|---|---|---|---|---|---|---|---|---|---|---|-------------------|---|-------------------|----------------------|--|--|--|
| A     | T | T | T | C | T | G | T | T | G | T | C | C | C | C | T | G | C | C | T | G | G | T | T     | C               | T   | T | T | G | C | G | C | G | C | T | C | T | G                 | C | T                 | Reference            |  |  |  |
| OIRx3 |   |   |   |   |   |   |   |   |   |   |   |   |   |   |   |   |   |   |   |   |   |   |       |                 |     |   |   |   |   |   |   |   |   |   |   |   |                   |   |                   |                      |  |  |  |
| A     | T | T | T | C | T | G | T | T | G | T | C | C | C | C | T | G | C | C | T | G | G | T | T     | C               | T   | T | T | G | C | G | C | G | C | T | C | T | G                 | C | T                 | 65.24% (43333 reads) |  |  |  |
| A     | T | T | T | C | T | G | T | T | G | T | C | C | C | C | T | G | C | C | T | G | G | T | -     | C               | T   | T | T | G | C | G | C | G | C | T | C | T | G                 | C | T                 | 3.09% (2055 reads)   |  |  |  |
| A     | T | T | T | C | T | G | T | T | G | T | C | C | C | C | T | G | C | C | T | - | - | - | -     | -               | -   | T | T | G | C | G | C | G | C | T | C | T | G                 | C | T                 | 3.07% (2040 reads)   |  |  |  |
| A     | T | T | T | C | T | G | T | T | G | T | C | C | C | C | T | G | C | C | T | - | - | - | -     | C               | T   | T | T | G | C | G | C | G | C | T | C | T | G                 | C | T                 | 2.95% (1962 reads)   |  |  |  |
| A     | T | T | T | C | T | G | T | T | G | T | C | C | C | C | T | G | C | C | T | - | - | - | -     | -               | -   | - | - | G | C | G | C | G | C | T | C | T | G                 | C | T                 | 0.99% (655 reads)    |  |  |  |
| A     | T | T | T | C | T | G | T | T | G | T | C | C | C | C | T | G | C | C | T | G | - | - | T     | C               | T   | T | T | G | C | G | C | G | C | T | C | T | G                 | C | T                 | 0.80% (532 reads)    |  |  |  |
| A     | T | T | T | C | T | G | T | T | G | T | C | C | C | C | T | G | C | C | T | G | - | - | -     | C               | T   | T | T | G | C | G | C | G | C | T | C | T | G                 | C | T                 | 0.80% (530 reads)    |  |  |  |
| A     | T | T | T | C | T | G | T | T | G | T | C | C | C | C | T | G | C | C | T | G | G | T | T     | -               | -   | - | T | G | C | G | C | G | C | T | C | T | G                 | C | T                 | 0.72% (480 reads)    |  |  |  |
| A     | T | T | T | C | T | G | T | T | G | T | C | C | C | C | T | G | C | - | - | - | - | - | -     | -               | -   | - | - | - | G | C | G | C | T | C | T | G | C                 | T | 0.71% (469 reads) |                      |  |  |  |
| A     | T | T | T | C | T | G | T | T | G | T | C | C | C | C | T | G | C | C | - | - | - | - | -     | -               | -   | - | - | - | - | - | - | - | - | - | - | - | -                 | - | 0.60% (399 reads) |                      |  |  |  |
| A     | T | T | T | C | T | G | T | T | G | T | C | C | C | C | T | G | C | C | T | G | G | T | T     | T               | C   | T | T | T | G | C | G | C | G | C | T | C | T                 | G | C                 | 0.59% (393 reads)    |  |  |  |
| A     | T | T | T | C | T | G | C | T | G | T | C | C | C | C | T | G | C | C | T | - | - | - | -     | C               | T   | T | T | G | C | G | C | G | C | T | C | T | G                 | C | T                 | 0.56% (369 reads)    |  |  |  |
| A     | T | T | T | C | T | G | T | T | G | T | C | C | C | C | T | G | C | C | T | G | G | T | T     | T               | T   | T | T | T | G | C | G | C | G | C | T | C | T                 | G | C                 | 0.54% (359 reads)    |  |  |  |
| A     | T | T | T | C | T | G | T | T | G | T | C | C | C | C | T | G | C | C | T | - | G | C | T     | C               | T   | T | T | G | C | G | C | G | C | T | C | T | G                 | C | T                 | 0.52% (343 reads)    |  |  |  |
| A     | T | T | T | C | T | G | T | T | G | T | C | C | C | C | T | G | C | C | T | G | G | T | -     | -               | -   | - | - | G | C | G | C | G | C | T | C | T | G                 | C | T                 | 0.50% (330 reads)    |  |  |  |
| A     | T | T | T | C | T | G | T | T | G | T | C | C | C | C | T | G | C | C | T | G | G | T | T     | -               | -   | - | - | G | C | G | C | G | C | T | C | T | G                 | C | T                 | 0.46% (304 reads)    |  |  |  |
| A     | T | T | T | C | T | G | T | T | G | T | C | C | C | C | T | - | - | - | - | - | - | - | -     | -               | -   | T | T | G | C | G | C | G | C | T | C | T | G                 | C | T                 | 0.42% (278 reads)    |  |  |  |
| A     | T | T | T | C | T | G | T | T | G | T | C | C | C | C | T | G | C | C | T | G | G | G | G     | G A C A A C A G |     |   |   |   | C | G | C | T | C | C | G | C | 0.34% (223 reads) |   |                   |                      |  |  |  |
| A     | T | T | T | C | T | G | T | T | G | T | C | C | C | C | T | G | C | C | T | G | C | C | T     | C               | T   | T | T | G | C | G | C | G | C | T | C | T | G                 | C | T                 | 0.31% (207 reads)    |  |  |  |
| A     | T | T | T | C | T | G | T | T | G | T | C | C | C | C | T | G | C | C | T | G | G | T | G     | C               | G C |   | T | T | T | G | C | G | C | G | C | T | C                 | T | G                 | 0.30% (197 reads)    |  |  |  |
| A     | T | T | T | C | T | G | T | T | G | T | C | C | C | C | T | G | C | - | - | - | - | - | T     | C               | T   | T | T | G | C | G | C | G | C | T | C | T | G                 | C | T                 | 0.29% (194 reads)    |  |  |  |
| A     | T | T | T | C | T | G | T | T | G | T | C | C | C | C | T | G | C | C | T | G | G | T | G G   |                 | T   | C | T | T | T | G | C | G | C | G | C | T | C                 | T | G                 | 0.29% (193 reads)    |  |  |  |
| A     | T | T | T | C | T | G | T | T | G | T | C | C | C | C | T | G | C | C | T | - | - | - | -     | -               | -   | - | - | - | G | C | G | C | T | C | T | G | C                 | T | 0.28% (186 reads) |                      |  |  |  |
| A     | T | T | T | C | T | G | T | T | G | T | C | C | C | C | T | G | C | C | T | G | G | T | C C C |                 |     | T | C | T | T | T | G | C | G | C | G | C | T                 | C | T                 | 0.27% (180 reads)    |  |  |  |
| A     | T | T | T | C | T | G | T | T | G | T | C | C | C | C | T | G | C | C | T | G | G | T | T     | -               | -   | T | T | G | C | G | C | G | C | T | C | T | G                 | C | T                 | 0.23% (150 reads)    |  |  |  |
| A     | T | T | T | C | T | G | T | T | G | T | C | C | C | C | T | G | C | C | T | G | G | T | T     | -               | T   | T | T | G | C | G | C | G | C | T | C | T | G                 | C | T                 | 0.22% (149 reads)    |  |  |  |
| A     | T | T | T | C | T | G | T | T | G | T | C | C | C | C | T | G | C | C | C | - | - | - | C     | C               | T   | T | T | G | C | G | C | G | C | T | C | T | G                 | C | T                 | 0.22% (145 reads)    |  |  |  |
| A     | T | T | T | C | T | G | T | T | G | T | C | C | C | C | T | G | C | C | T | G | G | T | C     | T               | C   | T | T | T | G | C | G | C | G | C | T | C | T                 | G | C                 | 0.21% (142 reads)    |  |  |  |

**bold**

Substitutions

Insertions

-

Deletions

-----

Predicted cleavage position

|       |   |   |   |   |   |   |   |   |   |   |   |   |   |   |   |   |   |   |   |   |   |   |   |   |   |   |   |   |   |   |   |   |   |   |   |   |   |   |                   |                      |                    |  |  |
|-------|---|---|---|---|---|---|---|---|---|---|---|---|---|---|---|---|---|---|---|---|---|---|---|---|---|---|---|---|---|---|---|---|---|---|---|---|---|---|-------------------|----------------------|--------------------|--|--|
| A     | T | T | T | C | T | G | T | T | G | T | C | C | C | C | T | G | C | C | T | G | G | T | T | C | T | T | T | G | C | G | C | G | C | T | C | T | G | C | T                 | Reference            |                    |  |  |
| OIRx3 |   |   |   |   |   |   |   |   |   |   |   |   |   |   |   |   |   |   |   |   |   |   |   |   |   |   |   |   |   |   |   |   |   |   |   |   |   |   |                   |                      |                    |  |  |
| A     | T | T | T | C | T | G | T | T | G | T | C | C | C | C | T | G | C | C | T | G | G | T | T | C | T | T | T | G | C | G | C | G | C | T | C | T | G | C | T                 | 71.88% (51091 reads) |                    |  |  |
| A     | T | T | T | C | T | G | T | T | G | T | C | C | C | C | T | G | C | C | T | - | - | - | - | C | T | T | T | G | C | G | C | G | C | T | C | T | G | C | T                 | 2.82% (2007 reads)   |                    |  |  |
| A     | T | T | T | C | T | G | T | T | G | T | C | C | C | C | T | G | C | C | T | G | G | T | - | C | T | T | T | G | C | G | C | G | C | T | C | T | G | C | T                 | 2.46% (1745 reads)   |                    |  |  |
| A     | T | T | T | C | T | G | T | T | G | T | C | C | C | C | T | G | C | - | - | - | - | - | - | - | - | - | - | - | - | G | C | G | C | T | C | T | G | C | T                 | 2.08% (1481 reads)   |                    |  |  |
| A     | T | T | T | C | T | G | T | T | G | T | C | C | C | C | T | G | C | C | T | - | - | - | - | - | - | - | T | T | G | C | G | C | G | C | T | C | T | G | C                 | T                    | 1.96% (1395 reads) |  |  |
| A     | T | T | T | C | T | G | T | T | G | T | C | C | C | C | T | G | C | C | T | - | - | - | - | - | - | - | - | G | C | G | C | G | C | T | C | T | G | C | T                 | 0.92% (653 reads)    |                    |  |  |
| A     | T | T | T | C | T | G | T | T | G | T | C | C | C | C | T | G | C | C | T | G | G | T | T | - | - | - | T | G | C | G | C | G | C | T | C | T | G | C | T                 | 0.90% (641 reads)    |                    |  |  |
| A     | T | T | T | C | T | G | T | T | G | T | C | C | C | C | T | G | C | C | T | - | - | - | - | - | - | - | - | - | G | C | G | C | T | C | T | G | C | T | 0.48% (344 reads) |                      |                    |  |  |
| A     | T | T | T | C | T | G | T | T | G | T | C | C | C | C | T | G | C | C | T | G | - | - | T | C | T | T | T | G | C | G | C | G | C | T | C | T | G | C | T                 | 0.42% (296 reads)    |                    |  |  |
| A     | T | T | T | C | T | G | T | T | G | T | C | C | C | C | T | G | C | C | T | G | G | T | T | T | C | T | T | T | G | C | G | C | G | C | T | C | T | G | C                 | 0.37% (260 reads)    |                    |  |  |
| A     | T | T | T | C | T | G | T | T | G | T | C | C | C | C | T | G | C | C | T | G | G | T | - | - | - | - | - | - | - | - | - | - | - | - | - | - | - | - | -                 | 0.28% (197 reads)    |                    |  |  |
| A     | T | T | T | C | T | G | T | T | G | T | C | C | C | C | T | G | C | C | T | G | C | C | T | C | T | T | T | G | C | G | C | G | C | T | C | T | G | C | T                 | 0.25% (177 reads)    |                    |  |  |
| A     | T | T | T | C | T | G | T | T | G | T | C | C | C | C | T | G | C | C | T | - | - | - | - | - | - | - | T | G | C | G | C | G | C | T | C | T | G | C | T                 | 0.25% (175 reads)    |                    |  |  |
| A     | T | T | T | C | T | G | T | T | G | T | C | C | C | C | T | G | C | C | T | G | C | C | T | C | C | T | T | T | G | C | G | C | G | C | T | C | T | G | C                 | 0.21% (147 reads)    |                    |  |  |

**bold**

Substitutions

Insertions

-

Deletions

-----

Predicted cleavage position

|       |   |   |   |   |   |   |   |   |   |   |   |   |   |   |   |   |   |   |   |   |   |   |   |   |   |   |   |   |   |   |   |   |   |   |   |   |   |   |                     |                        |                     |  |  |
|-------|---|---|---|---|---|---|---|---|---|---|---|---|---|---|---|---|---|---|---|---|---|---|---|---|---|---|---|---|---|---|---|---|---|---|---|---|---|---|---------------------|------------------------|---------------------|--|--|
| A     | T | T | T | C | T | G | T | T | G | T | C | C | C | C | T | G | C | C | T | G | G | T | T | C | T | T | T | G | C | G | C | G | C | T | C | T | G | C | T                   | - Reference            |                     |  |  |
| OIRx3 |   |   |   |   |   |   |   |   |   |   |   |   |   |   |   |   |   |   |   |   |   |   |   |   |   |   |   |   |   |   |   |   |   |   |   |   |   |   |                     |                        |                     |  |  |
| A     | T | T | T | C | T | G | T | T | G | T | C | C | C | C | T | G | C | C | T | G | G | T | T | C | T | T | T | G | C | G | C | G | C | T | C | T | G | C | T                   | - 69.81% (40315 reads) |                     |  |  |
| A     | T | T | T | C | T | G | T | T | G | T | C | C | C | C | T | G | C | C | T | - | - | - | - | C | T | T | T | G | C | G | C | G | C | T | C | T | G | C | T                   | - 3.06% (1765 reads)   |                     |  |  |
| A     | T | T | T | C | T | G | T | T | G | T | C | C | C | C | T | G | C | C | T | - | - | - | - | - | - | T | T | G | C | G | C | G | C | T | C | T | G | C | T                   | - 2.68% (1545 reads)   |                     |  |  |
| A     | T | T | T | C | T | G | T | T | G | T | C | C | C | C | T | G | C | C | T | G | G | T | - | C | T | T | T | G | C | G | C | G | C | T | C | T | G | C | T                   | - 2.66% (1534 reads)   |                     |  |  |
| A     | T | T | T | C | T | G | T | T | G | T | C | C | C | C | T | G | C | - | - | - | - | - | - | - | - | - | - | - | - | G | C | G | C | T | C | T | G | C | T                   | - 1.44% (832 reads)    |                     |  |  |
| -     | - | - | - | - | - | - | - | - | - | - | - | - | - | - | - | - | - | - | - | - | - | - | - | - | - | - | - | - | - | - | - | - | - | - | - | T | G | C | T                   | - 1.29% (747 reads)    |                     |  |  |
| A     | T | T | T | C | T | G | T | T | G | T | C | C | C | C | T | G | C | C | T | - | - | - | - | - | - | - | - | G | C | G | C | G | C | T | C | T | G | C | T                   | - 0.71% (408 reads)    |                     |  |  |
| A     | T | T | T | C | T | G | T | T | G | T | C | C | C | C | T | G | C | C | T | G | G | T | T | - | - | - | T | G | C | G | C | G | C | T | C | T | G | C | T                   | - 0.57% (331 reads)    |                     |  |  |
| A     | T | T | T | C | T | G | T | T | G | T | C | C | C | C | T | G | C | C | T | G | C | C | T | C | C | T | T | G | C | G | C | G | C | T | C | T | G | C | T                   | - 0.52% (303 reads)    |                     |  |  |
| A     | T | T | T | C | T | G | T | T | G | T | C | C | C | C | T | G | C | C | T | - | - | - | - | - | - | - | - | - | G | C | G | C | G | C | T | C | T | G | C                   | T                      | - 0.52% (302 reads) |  |  |
| A     | T | T | T | C | T | G | T | T | G | T | C | C | C | C | T | G | C | C | T | G | G | T | T | - | - | - | - | G | C | G | C | G | C | T | C | T | G | C | T                   | - 0.47% (273 reads)    |                     |  |  |
| A     | T | T | T | C | T | G | T | T | G | T | C | C | C | C | T | G | C | - | - | - | - | - | - | - | - | - | - | - | - | - | G | C | T | C | T | G | C | T | - 0.41% (235 reads) |                        |                     |  |  |
| A     | T | T | T | C | T | G | T | T | G | T | C | C | C | C | T | G | C | C | T | G | - | - | T | C | T | T | T | G | C | G | C | G | C | T | C | T | G | C | T                   | - 0.39% (226 reads)    |                     |  |  |
| A     | T | T | T | C | T | G | T | T | G | T | C | C | C | C | T | G | C | C | T | G | G | T | - | - | - | - | - | G | C | G | C | G | C | T | C | T | G | C | T                   | - 0.37% (215 reads)    |                     |  |  |
| A     | T | T | T | C | T | G | T | T | G | T | C | C | C | C | T | - | - | - | - | - | - | - | - | - | - | T | T | G | C | G | C | G | C | T | C | T | G | C | T                   | - 0.34% (199 reads)    |                     |  |  |
| A     | T | T | T | C | T | G | T | T | G | T | C | C | C | C | T | G | C | C | T | - | G | C | T | C | T | T | T | G | C | G | C | G | C | T | C | T | G | C | T                   | - 0.34% (195 reads)    |                     |  |  |
| A     | T | T | T | C | T | G | T | T | G | T | C | C | C | C | T | G | C | C | T | G | G | T | T | T | C | T | T | T | G | C | G | C | G | C | T | C | T | G | C                   | - 0.33% (188 reads)    |                     |  |  |
| A     | T | T | T | C | T | G | T | T | G | T | C | C | C | C | T | - | - | - | - | - | - | - | - | C | T | T | T | G | C | G | C | G | C | T | C | T | G | C | T                   | - 0.30% (174 reads)    |                     |  |  |
| A     | T | T | T | C | T | G | T | T | G | T | C | C | C | C | T | G | C | C | T | - | - | - | - | - | - | - | - | - | - | - | G | C | T | C | T | G | C | T | - 0.29% (169 reads) |                        |                     |  |  |
| A     | T | T | T | C | T | G | T | T | G | T | C | C | C | C | T | G | C | C | T | - | - | - | - | - | - | - | - | - | - | - | - | G | C | T | C | T | G | C | T                   | - 0.29% (165 reads)    |                     |  |  |
| A     | T | T | T | C | T | G | T | T | G | T | C | C | C | C | T | G | C | C | T | G | G | T | T | T | G | G | T | T | C | T | T | T | G | C | G | C | G | C | T                   | - 0.28% (161 reads)    |                     |  |  |
| A     | T | T | T | C | T | G | T | T | G | T | C | C | C | C | T | G | C | C | T | G | G | T | T | G | T | C | C | C | C | T | G | C | T | C | T | T | T | G | C                   | - 0.25% (143 reads)    |                     |  |  |
| A     | T | T | T | C | T | G | T | T | G | T | C | C | C | C | T | G | C | C | T | G | G | T | C | T | C | T | T | T | G | C | G | C | G | C | T | C | T | G | C                   | - 0.22% (129 reads)    |                     |  |  |
| A     | T | T | T | C | T | G | T | T | G | T | C | C | C | C | T | G | C | - | - | - | - | - | T | C | T | T | T | G | C | G | C | G | C | T | C | T | G | C | T                   | - 0.22% (126 reads)    |                     |  |  |

**bold**

Substitutions

Insertions

-

Deletions

-----

Predicted cleavage position

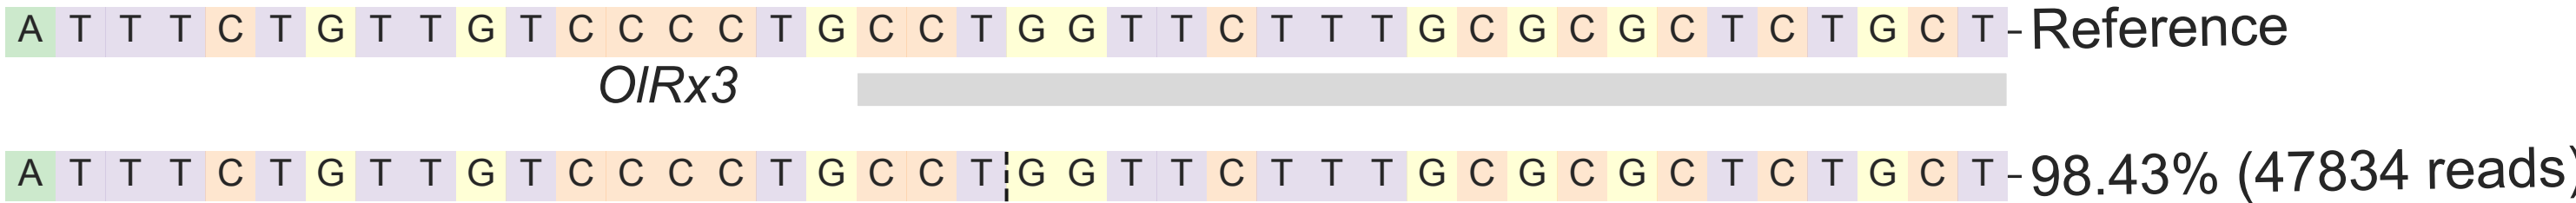

**bold** Substitutions

Insertions

- Deletions

----- Predicted cleavage position

uninjected pool1 *OIRx3*

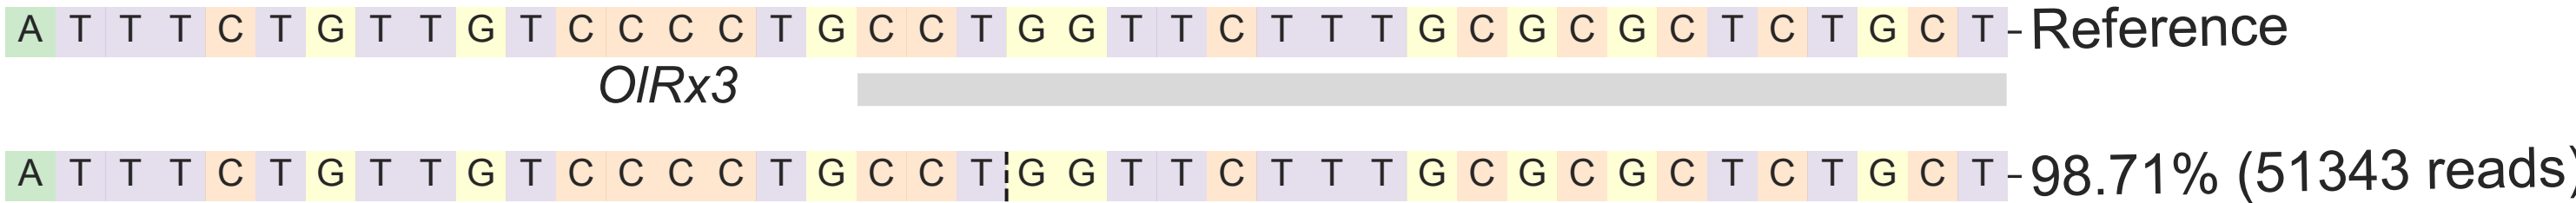

**bold** Substitutions

Insertions

- Deletions

----- Predicted cleavage position

uninjected pool2 OIRx3

A T T T C T G T T G T C C C C T G C C T G G T T C T T T G C G C G C T C T G C T - Reference  
*OIRx3*

A T T T C T G T T G T C C C C T G C C T **G** G T T C T T T G C G C G C T C T G C T - 98.35% (58453 reads)

**bold** Substitutions  
 Insertions  
- Deletions  
----- Predicted cleavage position

uninjected pool3 *OIRx3*
